# Supplementary material
Source: publisher figshare collection journal article supplement (https://gsapubs.figshare.com/ndownloader/files/23316707)
Supplement: Supplementary file 1 [file 23316707]

## Sheet: Sample summary
Chapman, A.D., and Laskowski, A.K., 2019, Detrital zircon U-Pb data reveal a Mississippian sediment dispersal network originating in the Appalachian orogen, traversing North America along its southern shelf, and reaching as far as the southwest USA: Lithosphere, https://doi.org/10.1130/L1068.1.
GSA Data Repository Item 2019260
Plate number	Sample on plate	Lithology (original sample name, if available)	Depositional age	Reference
1B	1	Fincastle Member, Martinsburg Fm.	Upper Ordovician	Park et al. (2009)
1B	2	Oswego Fm.	Upper Ordovician	Park et al. (2009)
1B	3	St. Peter Sandstone (13MO2)	Upper Ordovician	This study
1B	4	Oil Creek Sandstone (13OK1)	Upper Ordovician	This study
1B	5	Simpson Sandstone (Gibbons-Hess)	Upper Ordovician	This study
1B	40	Roubidoux Sandstone (13MO1)	Ordovician	This study
1B	41	Gunther Sandstone (14MO8)	Ordovician	This study
1B	59	Winnipeg Formation (18BH2A)	Middle Ordovician	This study
1B	6	St. Peter Sandstone (KP-02)	Upper Ordovician	Konstantinou et al. (2013)
1B	7	St. Peter Sandstone (KP-70)	Upper Ordovician	Konstantinou et al. (2013)
1B	8	St. Peter Sandstone (PNL2)	Upper Ordovician	Konstantinou et al. (2013)
1B	9	St. Peter Sandstone (WY-90)	Upper Ordovician	Konstantinou et al. (2013)
1B	10	St. Peter Sandstone (WY-87 and WY-89 combined)	Upper Ordovician	Konstantinou et al. (2013)
1B	11	Simpson Group (BM, TM, BT, TCT, and USSB combined)	Upper Ordovician	Pickell (2012)
1B	12	Calico Rock Ss (BC and CR combined)	Upper Ordovician	Pickell (2012)
1B	13	St. Peter Ss (S5 and AS2 combined)	Upper Ordovician	Pickell (2012)
1B	14	Blakely and Blaylock sandstones combined	Upper Ordovician	Gleason et al. (2002)
1B	15	Middle Ord American Tickle Fm.	Middle Ordovician	Cawood and Nemchin (2001)
1B	16	Middle Ord Normanskill Fm. (BB-1)	Middle Ordovician	McLennan et al. (2001)
1B	17	Colvin Mountain Ss. (AL-1-CM)	Lower Ordovician	Thomas et al. (2017)
1B	18	Bays Fm. (O1, O2, O3 combined)	Upper Ordovician	Eriksson et al. (2004)
1B	19	Monkman Fm.	Lower-Middle Ordovician	Gehrels and Pecha (2014)
1B	20	Mt. Wilson Fm.	Middle-Upper Ordovician	Gehrels and Pecha (2014)
1B	21	Eureka Quartzite	Middle Ordovician	Gehrels and Pecha (2014)
1B	22	Vinini Fm.	Lower-Middle Ordovician	Gehrels and Pecha (2014)
1B	23	Valmy Fm.	Ordovician	Gehrels and Pecha (2014)
1B	24	Quazrtzite of Sierra Lopez	Middle-Upper Ordovician	Gehrels and Pecha (2014)
1B	25	Quartzite of Sierra El Aliso	Middle Ordovician	Gehrels and Pecha (2014)
1B	26	Snow Cyn. Fm.	Ordovician	Linde et al. (2016)
1B	27	McAfee Quartzite	Ordovician	Linde et al. (2016)
1B	28	Vinini Fm. (upper and lower combined)	Ordovician	Linde et al. (2016)
1B	29	May Lake pendant strata	Ordovician (?)	Memeti et al. (2010)
1B	30	Eureka Quartzite-Talc City Hills	Ordovician	Attia et al. (2018)
1B	31	Kinnikinic Quartzite and Phi Kappa Fm. Combined	Ordovician	Beranek et al. (2016)
1B	32	Harding Ss.	Ordovician	Siddoway and Gehrels (2014)
1B	33	Crystal Mountain, Blakely, and Womble sandstones combined	Ordovician	McGuire (2017)
1B	34	Crystal Polk Creek sandstone	Ordovician	McGuire (2017)
1B	35	Cushing Fm.	Ordovician	West et al. (2008)
1B	36	San Marcos Quartzite	Ordovician	Gehrels et al. (2002)
1B	37	Sierra Calamajue and Sierra Asamblea, combined	Ordovician	Alsleben et al. (2012)
1B	38	Bliss Fm., east of Florida Mountains, combined	Upper Cambrian-Lower Ordovician	Amato and Mack (2012)
1B	39	Bliss Fm., west of Florida Mountains, combined	Upper Cambrian-Lower Ordovician	Amato and Mack (2012)
1B	42	Quimby Fm.	Ordovician	Bradley and O'Sullivan (2017)
1B	43	Magog Group (Ware Volcanics and Saint Victor Fm, combined), Quebec	Middle-Upper Ordovician	DeSouza et al. (2014)
1B	44	Bunker Hill (Bunker volcanics and metasediments combined), Quebec	Middle-Upper Ordovician	DeSouza et al. (2014)
1B	45	Calais Formation (VL-2001-12)	Lower Ordovician	Fyffe et al. (2009)
1B	46	MacKinnons Brook, Ferrona Formation, and Redmans Formation combined	Ordovician	Henderson et al. (2016)
1B	47	Bears Brook Fm (BB-1)	Middle Ordovician	Murphy et al. (2004a)
1B	48	Halifax Group, 2 samples combined	Ordovician	Pothier et al. (2015)
1B	49	Tomogonops, Val Michaud, Elmtree, and Duncans Brook Fm.	Upper Ordovician	Wilson et al. (2015)
1B	50	Knights Brook Fm.	Lower Ordovician	Wilson et al. (2015)
1B	51	Rocky Pond Slice (Boylston phyllite, schist and Sewall Hill Fm. combined)	Ordovician (?)	He (2017)
1B	52	Southern Vaughn Hill Fm.	Ordovician (?)	He (2017)
1B	53	Vaughn Hill Fm.	Ordovician	Charnock (2015)
1B	54	Nashoba terrane (Marlboro Fm., Nashoba gneiss and schist, and Tadmuck Brook schist combined)	Ordovician	Loan (2011)
1B	55	Bighorn Dolomite	Ordovician	Malone et al. (2017)
1B	56	St. Peter Sandstone (Volney, Elkader, Guttenberg combined)	Upper Ordovician	Ibrahim (2016)
1B	57	St. Peter Sandstone (UHS, HSL, B1 combined)	Upper Ordovician	Ibrahim (2016)
1B	58	St. Peter Sandstone (J1, J2 combined)	Upper Ordovician	Ibrahim (2016)
2B	1	Tuscarora Fm.	Silurian	Park et al. (2009)
2B	2	Rose Hill Fm.	Silurian	Park et al. (2009)
2B	3	Keeper Fm.	Silurian	Park et al. (2009)
2B	4	Oriskany Fm.	Devonian	Park et al. (2009)
2B	5	Foreknobs Fm.	Devonian	Park et al. (2009)
2B	6	Chemung Fm.	Devonian	Park et al. (2009)
2B	7	Hampshire Fm.	Devonian	Park et al. (2009)
2B	8	Bushberg Ss. (14MO4 - 15S, 727981E, 4248738N)	Devonian	This study
2B	52	Sappington Fm. (180721FL1 - NAD83, -110.97726, 45.90480)	Devonian	This study
2B	9	Shawangunk Fm. (NP-1; S)	Lower Silurian	Gray and Zeitler (1997); McLennan et al. (2001)
2B	10	Catskill "Redbed" (93SM003)	Upper Devonian	McLennan et al. (2001)
2B	11	Frog Mountain Ss. (AL-2-FM)	Devonian	Thomas et al. (2017)
2B	12	Eagle Rock and Chemung-Cloyd (S1, D1 combined)	Silurian-Devonian	Eriksson et al. (2004)
2B	13	Wokkpash Fm.	Lower-Middle Devonian	Gehrels and Pecha (2014)
2B	14	Sassenach Fm.	Upper Devonian	Gehrels and Pecha (2014)
2B	15	Oxyoke Cyn. Ss.	Middle Devonian	Gehrels and Pecha (2014)
2B	16	Quartzite of Cerro Pollo	Upper Devonian	Gehrels and Pecha (2014)
2B	17	Los Pozos Fm.	Upper Devonian	Gehrels and Pecha (2014)
2B	18	Temple Butte Fm.	Middle-Upper Devonian	Gehrels et al. (2011)
2B	19	Elder Ss. and Slaven Chert combined	Silurian-Devonian	Linde et al. (2016)
2B	20	Mt. Morrison Fm.	Devonian	Attia et al. (2018)
2B	21	Lost Burro Fm.	Devonian	Attia et al. (2018)
2B	22	Shoo Fly, Picayune Valley Composite (Excludes Sierra City Melange)	"Pre-Upper Devonian"	Harding et al. (2000); Spurlin et al. (2000)
2B	23	Milligen Fm., Cait Quartzite	Devonian	Beranek et al. (2016)
2B	24	upper Milligen and Jefferson Fms., combined	Devonian	Beranek et al. (2016)
2B	25	Williams Canyon Fm.	Devonian	Siddoway and Gehrels (2014)
2B	26	Bakken Fm.	Upper Devonian-Lower Mississippian	Mohamed (2015)
2B	27	Exshaw Fm.	Upper Devonian-Lower Mississippian	Mohamed (2015)
2B	28	Blaylock Ss.	Silurian	McGuire (2017)
2B	29	Muncho-McConnell, Slave Point, massive channel deposits combined	Silurian-Devonian	Ross et al. (1993)
2B	30	Carrabassett Fm.	Lower Devonian	Dorais et al. (2009)
2B	31	Chase Fm.	Middle-Upper Devonian	Lemieux et al. (2007)
2B	32	Antelope Mountain Quartzite	"Pre-Upper Devonian"	Wallin et al. (2000)
2B	33	Mount Forster Fm., Akolkolex Fm, Broadview Fm, and Mount Sproat assemblage	"Devonian and older"	Kraft (2012)
2B	34	Chase quartzite	Upper Devonian	Kraft (2012)
2B	35	St. Marys Basin, SM-1, SR-1, and VP-1 combined	Upper Devonian-Lower Carboniferous	Murphy and Hamilton (2000)
2B	36	Monashee cover sequence (Group 2 only)	Devonian (?)	Kuiper et al. (2014)
2B	37	Silurian-Devonian composite	Silurian-Devonian	Bradley and O'Sullivan (2017)
2B	38	Compton Fm. (samples 09MILAN01 and 09MILAN02, combined), Quebec	Devonian	DeSouza et al. (2014)
2B	39	Magog Grp. (sample 09SV02), Quebec	Silurian	DeSouza et al. (2014)
2B	40	Fredericton Trough (Burtts Corner, Digdeguash, Hayes Brook, and Flume Ridge Fms. Combined)	Silurian	Dokken (2017)
2B	41	Mascarene Group (Waweig, Eastport, and Back Bay fms. Combined)	Silurian	Dokken (2017)
2B	42	Horton group	Upper Devonian-Lower Carboniferous	McWilliams et al. (2010)
2B	43	Beechill Cove, French River, Stonehouse, White Rock, and Torbrook Fms.	Silurian-Devonian	Murphy et al. (2004a, 2004b)
2B	44	Leatham Fm. LHU-LF1	Upper Devonian	Cole et al. (2015)
2B	45	Parting Fm. GCD_1	Upper Devonian	Cole et al. (2015)
2B	46	Kittery - Fredericton correlative?	Silurian (?)	Wintsch et al. (2007)
2B	47	Berwick and Hebron (H-S sample excluded due to high grade metamorphism)	Silurian-Devonian	Wintsch et al. (2007)
2B	48	Harvard and Vaughn Hill conglomerates, combined	Devonian	Charnock (2015)
2B	49	Kittery, Eliot, Berwick, Oakdale, Worcester, and Paxton Fms., combined; Cambrian Tower Hill excluded	Silurian	Sorota (2013)
2B	50	Newbury volcanic complex	Devonian (?)	Loan (2011)
2B	51	eastern Inner Piedmont	Silurian-Devonian	Bream et al. (2004)
3B	1	Price Ss.	Mississippian	Park et al. (2009)
3B	2	Grainger Fm.	Mississippian	Park et al. (2009)
3B	3	Mauch Chunk Fm.	Mississippian	Park et al. (2009)
3B	4	Hinton Fm.	Mississippian	Park et al. (2009)
3B	5	Princeton Fm.	Mississippian	Park et al. (2009)
3B	6	Bluestone Fm.	Mississippian	Park et al. (2009)
3B	7	Wedington Ss. (All samples combined)	Mississippian	Xie et al. (2016a)
3B	8	Aux Vases Ss. (14MO3 - 16S, 236940E, 4200921N)	Mississippian	This study
3B	9	Ste. Genevieve Fm. (Amoco#1 Puyear well; 14S, 264382E, 4164452N)	Mississippian	This study
3B	28	Kibbey Fm. (180713SWC3 NAD83, -109.32626, 46.71101)	Mississippian	This study
3B	10	Parkwood/Pride Mountain formations. (All samples combined)	Mississippian	Xie et al. (2016b)
3B	11	Mauch Chunk-Pottsville wedge (KY-21-SG)	Upper Mississippian	Thomas et al. (2017)
3B	12	Amsden Fm. (BCRA-01-10)	Lowermost Pennsylvanian	May et al. (2013)
3B	13	Tonka Fm., samples from each reference combined	Mississippian	Gehrels and Dickinson (2000); Gehrels and Pecha (2014)
3B	14	Surprise Canyon Fm.	Upper Mississippian	Gehrels et al. (2011)
3B	15	Mexican Spring Fm.	Mississippian	Attia et al. (2018)
3B	16	Schoonover (Q and V combined) Fm.	Mississippian	Riley et al. (2000)
3B	17	Copper Basin Grp. And Salmon River assemblage, all samples combined	Mississippian	Beranek et al. (2016)
3B	18	Hot Spring and Stanley combined	Mississippian	McGuire (2017)
3B	19	Bragdon Fm.	Mississippian	Gehrels and Miller (2000)
3B	20	Thompson and Davis assemblages	Mississippian	Kraft (2012)
3B	21	McHardy assemblage, 07TWJK153	Mississippian-Pennsylvanian	Kraft (2012)
3B	22	Inskip Fm.	Mississippian	Gehrels and Dickinson (2000)
3B	23	Pass Creek unit	Mississippian	Darby et al. (2000)
3B	24	Gilman Sandstone GIL-M1	Lower Mississippian	Cole et al. (2015)
3B	25	Joana Limestone LMH132.92	Lower Mississippian	Cole et al. (2015)
3B	26	Santiago Fm.	Lower Mississippian	Gillis et al. (2005)
3B	27	Marshall Sandstone (MIB-062510-01 and MIB-062510-02 combined)	Lower-Middle Mississippian	Boothroyd (2012)
4B	1	Moberly Ss. (15MO1 - 15S, 533851E, 4360992N)	Upper Pennsylvanian	This study
4B	2	Warrensburg Ss. (15MO2 - 15S, 434292E,4291426N)	Upper Pennsylvanian	This study
4B	3	Kearny Fm. (MESA-PET Seacat 5-19 well; 14S, 443295E, 4131896N)	Lower Pennsylvanian	This study
4B	37	Amsden Fm. (10DM14 - UTM 12N 485883E, 4966973N)	Pennsylvanian	This study
4B	38	Quadrant Fm. (10DM15 - NAD83 12N 485717E, 4966991N)	Pennsylvanian	This study
4B	48	Minnelusa Sandstone	Pennsylvanian	This study
4B	4	Forest City Basin combined	Pennsylvanian	Kissock (2016); Kissock et al. (2017)
4B	5	Illinois Basin combined (Data missing from Appendix C?)	Pennsylvanian	Kissock (2016); Kissock et al. (2017)
4B	6	Sewanee Conglomerate and Cross Mountain Fm. combined	Pennsylvanian	Thomas et al. (2004)
4B	7	Pottsville Fm. (P - GS97); Tumbling Run Member (1 - B05)	Pennsylvanian	Gray and Zeitler (1997); Becker et al. (2005)
4B	8	KY-18-CB Corbin	Lower Pennsylvanian	Thomas et al. (2017)
4B	9	OH-1-SS Sharon south	Lower Pennsylvanian	Thomas et al. (2017)
4B	10	OH-1-SN Sharon north	Lower Pennsylvanian	Thomas et al. (2017)
4B	11	VA-1-GN Grundy	Middle Pennsylvanian	Thomas et al. (2017)
4B	12	KY-19-PR7 Princess	Middle Pennsylvanian	Thomas et al. (2017)
4B	13	Monongahela+Conemaugh combined	Upper Pennsylvanian	Dodson (2008)
4B	14	Raleigh (P1, P2 combined)	Pennsylvanian	Eriksson et al. (2004)
4B	15	Vanoss Conglomerate (OK-1-VN and OK-2-V2 combined)	Pennsylvanian	Thomas et al. (2016)
4B	16	Tensleep Fm. (07-CM-001, 07-BC-001, and 07-BHU-001 combined)	Pennsylvanian	May et al. (2013)
4B	17	Pottsville Fm. (2)	Pennsylvanian	Becker et al. (2005)
4B	18	Pocahontas Fm. (3)	Pennsylvanian	Becker et al. (2005)
4B	19	Lee Fm. (4)	Pennsylvanian	Becker et al. (2005)
4B	20	Raccoon Mountain Fm. (6)	Pennsylvanian	Becker et al. (2005)
4B	21	Pottsville Fm. (7)	Pennsylvanian	Becker et al. (2005)
4B	22	Wood River Fm. (A)	Middle Pennsylvanian	Link et al. (2014)
4B	23	Tensleep Fm. (E)	Pennsylvanian	Link et al. (2014)
4B	24	Weber Ss.. (F)	Pennsylvanian	Link et al. (2014)
4B	25	Weber Ss.. (G)	Pennsylvanian	Link et al. (2014)
4B	26	Spray Lakes Grp.	Pennsylvanian	Gehrels and Pecha (2014)
4B	27	Battle Fm..	Pennsylvanian	Gehrels and Pecha (2014)
4B	28	Supai Grp. (Excludes Permian units).	Pennsylvanian	Gehrels et al. (2011)
4B	29	Jory Fm.	Pennsylvanian	Riley et al. (2000)
4B	30	Haymond Fm., 2 samples combined	Pennsylvanian	Gleason et al. (2007)
4B	31	Fountain Fm.	Pennsylvanian	Siddoway and Gehrels (2014)
4B	32	Paradox basin	Pennsylvanian	Soreghan et al. (2002)
4B	33	Pedregosa basin	Pennsylvanian	Soreghan et al. (2002)
4B	34	Big Saline Fm., S3	Pennsylvanian	Alsalem et al. (2018)
4B	35	Grindstone Creek, Brazos River, Mineral Wells, and Colony Creek fms., combined, S4-S8	Pennsylvanian
4B	36	Dry Creek (Sedona Arch)	Pennsylvanian	Soreghan et al. (2007)
4B	39	Atoka Fm. (Oklahoma samples 16, 28, 38, 48, 23, 49, 50, and 29 combined)	Pennsylvanian	Sarrah (2006)
4B	40	Atoka Fm. (Arkansas samples 46_1 and 46_2 combined)	Pennsylvanian
4B	41	Molas Fm., 2 samples combined	Pennsylvanian	Evans et al. (2015)
4B	42	Macal Fm.	Pennsylvanian-Permian	Martens et al. (2010)
4B	43	Santa Rosa Fm. (CB55 and SR1 combined)	Pennsylvanian	Weber et al. (2006)
4B	44	Amsden Fm. (BCRA-01-10) - reported in figure 7. as "Late Mississippian"	Lower Pennsylvanian	May et al. (2013)
4B	45	Ixtaltepec Fm.	Lower-Middle Pennsylvanian	Gillis et al. (2005)
4B	46	Marmaton Grp. And Chariton conglomerate combined	Pennsylvanian	McFadden et al. (2012)
4B	47	Parma, Saginaw, and Eaton fms. Combined	Upper Mississippian-Middle Pennsylvanian	Boothroyd (2012)

## Sheet: Ordovician
	For generating pie diagrams
	Inferred source	lower limit	upper limit		age ref
	1. Appalachian plutons	0	480		Park, H., Barbeau, D.L., Rickenbaker, A., Bachmann-Krug, D., and Gehrels, G., 2009, Application of Foreland Basin Detrital-Zircon Geochronology to the Reconstruction of the Southern and Central Appalachian Orogen, Journal of Geology, v. 118, p. 23-44.
	2. Suwanee/Meguma	540	700		Park, H., Barbeau, D.L., Rickenbaker, A., Bachmann-Krug, D., and Gehrels, G., 2009, Application of Foreland Basin Detrital-Zircon Geochronology to the Reconstruction of the Southern and Central Appalachian Orogen, Journal of Geology, v. 118, p. 23-44.
	3. Grenville crust	950	1300		Whitmeyer, S.J., and Karlstrom, K.E., 2007, Tectonic model for the Proterozoic growth of North America. Geosphere, v. 3, p. 220-259.
	4. OK-CO Aulacogen	530	540		Hanson, R. E., Puckett, R. E, Jr., Keller, G. R., Brueseke, M. E., Bulen, C. L., Mertzman, S. A., Finegan, S. A., & McCleery, D. A.,2013, Intraplate magmatism related to opening of the southern Iapetus Ocean: Cambrian Wichita igneous province in the Southern Oklahoma rift zone. Lithos, 174, 57-70.
	5. Granite/Rhyolite	1300	1500		Whitmeyer, S.J., and Karlstrom, K.E., 2007, Tectonic model for the Proterozoic growth of North America. Geosphere, v. 3, p. 220-259.
	6. Yavapai/Mazatzal	1600	1800		Whitmeyer, S.J., and Karlstrom, K.E., 2007, Tectonic model for the Proterozoic growth of North America. Geosphere, v. 3, p. 220-259.
	7. 1.8-2.0 Ga	1800	2000		Whitmeyer, S.J., and Karlstrom, K.E., 2007, Tectonic model for the Proterozoic growth of North America. Geosphere, v. 3, p. 220-259.
	8. Archean craton	2500	4000		Whitmeyer, S.J., and Karlstrom, K.E., 2007, Tectonic model for the Proterozoic growth of North America. Geosphere, v. 3, p. 220-259.
	5. Midcontinent rift	1096	1107	Paces and Miller (1993)
	Park et al. (2009)						Chapman and Laskowski (2018 - this study)																		Konstantinou et al. (2013)															Pickell (2012)									Gleason et al. (2002)
	Plate 1B sample #1	U Ord Fincastle Member, Martinsburg Fm.		Plate 1B sample #2	U Ord Oswego Fm.		Plate 1B sample #3	U Ord St. Peter Ss. (13MO2 - Pacific, MO)		Plate 1B sample #4	U Ord Oil Creek Ss. (13OK1 -Mill Creek, OK; 14S, 695765E, 3816335N)		Plate 1B sample #5	U Ord Simpson Ss. (Gibbons-Hess 2 well; 14S, 527636E, 4166839N)		Plate 1B sample #40	Ord Roubidoux Ss. (13MO1 - Rolla, MO)		Plate 1B sample #41	Ord Gunther Ss. (14MO8 - Ha Ha Tonka State Park)		Plate 1B sample #59	Middle Ord Winnipeg Fm. (18BH2A - Hwy 14, northern Black Hills)		Plate 1B sample #6	U Ord St. Peter Ss. (KP-02)		Plate 1B sample #7	U Ord St. Peter Ss. (KP-70)		Plate 1B sample #8	U Ord St. Peter Ss. (PNL2)		Plate 1B sample #9	U Ord St. Peter Ss. (WY-90)		Plate 1B sample #10	U Ord St. Peter Ss. (WY-87 and WY-89 combined)		Plate 1B sample #11	U Ord Simpson Group (Samples BM, TM, BT, TCT, and USSB combined))		Plate 1B sample #12	U Ord Calico Rock Ss (Samples BC and CR combined))		Plate 1B sample #13	U Ord St. Peter Ss (Samples S5 and AS2 combined))		Plate 1B sample #14
Source	Frequency	Relative Frequency		Frequency	Relative Frequency		Frequency	Relative Frequency		Frequency	Relative Frequency		Frequency	Relative Frequency		Frequency	Relative Frequency		Frequency	Relative Frequency		Frequency	Relative Frequency		Frequency	Relative Frequency		Frequency	Relative Frequency		Frequency	Relative Frequency		Frequency	Relative Frequency		Frequency	Relative Frequency		Frequency	Relative Frequency		Frequency	Relative Frequency		Frequency	Relative Frequency		Frequency
1	0	0		4	0.0444444		0	0		1	0.011236		0	0		0	0		0	0		0	0		0	0		0	0		0	0		0	0		0	0		0	0		0	0		0	0		1
2	0	0		2	0.0222222		0	0		0	0		0	0		0	0		0	0		1	0.0126582		0	0		0	0		0	0		0	0		0	0		0	0		0	0		0	0		0
3	61	0.642105		43	0.477778		22	0.215686		2	0.0224719		4	0.039604		16	0.170213		39	0.39		2	0.0253165		58	0.58		9	0.0947368		37	0.359223		31	0.319588		104	0.622754		56	0.118393		105	0.555556		51	0.309091		31
4	0	0		0	0		0	0		0	0		0	0		0	0		0	0		0	0		0	0		0	0		0	0		0	0		0	0		0	0		0	0		0	0		0
5	28	0.294737		29	0.322222		3	0.0294118		5	0.0561798		2	0.019802		1	0.0106383		8	0.08		0	0		11	0.11		1	0.0105263		24	0.23301		8	0.0824742		37	0.221557		33	0.0697674		31	0.164021		12	0.0727273		5
6	4	0.0421053		6	0.0666667		0	0		2	0.0224719		2	0.019802		1	0.0106383		0	0		6	0.0759494		2	0.02		1	0.0105263		5	0.0485437		0	0		5	0.0299401		21	0.0443975		6	0.031746		2	0.0121212		1
7	1	0.0105263		1	0.0111111		6	0.0588235		11	0.123596		3	0.029703		0	0		2	0.02		47	0.594937		1	0.01		1	0.0105263		2	0.0194175		3	0.0309278		0	0		38	0.0803383		3	0.015873		9	0.0545455		0
8	1	0.0105263		5	0.0555556		71	0.696078		68	0.764045		90	0.891089		76	0.808511		51	0.51		23	0.291139		28	0.28		83	0.873684		35	0.339806		55	0.56701		21	0.125749		325	0.687104		44	0.232804		91	0.551515		5
sum	95			90			102			89			101			94			100			79			100			95			103			97			167			473			189			165			43
%grains not considered	3.06122			8.16327			0.970874			0			0			1.05263			0			15.0538			0			0			0.961538			0			3.46821			1.86722			3.07692			1.1976			0
	U-Pb age	1s error		U-Pb age	1s error		U-Pb age	1s error		U-Pb age	1s error		U-Pb age	1s error		U-Pb age	1s error		U-Pb age	1s error		U-Pb age	1s error		U-Pb age	1s error		U-Pb age	1s error		U-Pb age	1s error		U-Pb age	1s error		U-Pb age	1s error		U-Pb age	1s error		U-Pb age	1s error		U-Pb age	1s error		U-Pb age
	1011.1	85.6324		461.063	5.65101		1034.37	57.1605		470.409	7.47301		1076.54	92.3376		1040.39	40.3813		961.532	52.9942		1868.69	14.3709		1031.29	11.2343		2699.64	6.27984		3289.28	37.1363		1066.28	36.2907		1086.21	34.8482		1065	23		962	14		1041	22		468
	1015.41	23.7084		462.655	4.46443		1061.4	23.9503		1077.49	50.8421		1109.43	101.098		1070.47	35.4216		987.862	45.7041		1848.01	9.55486		1313.55	8.35804		2682.05	5.41721		1324.79	66.5238		2611.85	21.1505		1568.83	13.8318		1074	15		970	19		1048	19		979
	1017.93	20.2879		463.75	8.72551		1062.47	22.5099		1078.55	22.5381		1112.42	65.7635		1079.35	27.6073		1016.4	32.847		1984.61	13.3835		1295.97	9.12697		2721.62	6.2286		1050.63	23.1705		2718.21	13.464		1017.97	17.702		1079	15		972	14		1049	19		1005
	1027.29	25.5391		478.059	4.79193		1062.87	23.7264		1301.39	17.4605		1163.1	73.9873		1080.5	12.0138		1017.45	41.1971		1920.07	17.5415		1354.06	7.91411		2754.99	5.32833		1198.01	31.8452		2708.52	2.00233		1090.7	25.6068		1079	15		999	22		1085	15		1004
	1037.42	71.5026		667.774	6.34352		1064.07	35.8268		1354.48	29.3359		1305.88	55.4491		1099.51	20.4773		1031.33	39.2569		2715.13	17.2642		2676.93	7.19898		2680.82	5.81373		2955.6	28.2395		2736.02	8.16045		955.805	61.6198		1087	19		1002	38		1092	13		1019
	1040.87	90.0404		692.766	17.6034		1065.39	27.5663		1432.67	50.2237		1336.97	71.7669		1100.34	27.1624		1031.65	45.2177		1237.98	21.9565		1049.12	10.8587		2744.85	5.37736		1472.92	32.9032		2782.33	8.81639		1057.32	42.6948		1094	17		1014	14		1097	16		1026
	1041.84	33.7207		1005.19	33.9281		1069.54	20.6022		1441.22	31.9005		1681.97	154.796		1118.27	18.5475		1038.77	35.2935		1851.11	17.6209		1075.94	6.79703		2691.28	5.32183		1199.24	98.5477		2699.63	10.5679		1035.88	55.1157		1798	15		1021	20		1098	18		1024
	1041.9	40.3811		1016.05	27.591		1076.65	23.8652		1489.85	12.8142		1690.71	114.384		1122.7	52.5532		1043.45	43.3708		1948.27	16.344		1225.72	6.05521		1819.15	6.03574		1341.68	38.9503		1346.63	15.8382		1632.18	17.3491		1826	10		1027	20		1102	16		1032
	1055.4	51.5729		1021.79	37.9359		1078.1	12.5865		1777.34	30.3765		1836.24	146.081		1134.94	13.0478		1043.92	35.7473		2051.71	46.1599		991.334	14.0645		2678.91	5.09127		2786.73	29.9824		2739.27	10.0966		1033.09	26.928		1828	13		1032	18		1106	13		1052
	1058.24	26.1728		1024.22	20.2385		1080.29	10.5868		1783.07	6.74602		1841.3	9.85193		1141.99	29.4217		1047.67	37.9495		2610.51	13.2781		1071.91	6.32712		2741.82	6.11498		2621.95	24.4888		1073.16	21.4678		1398.54	20.7828		1828	11		1032	33		1116	11		1062
	1061.92	57.9619		1024.5	51.2537		1080.93	16.2848		1822.01	15.0739		1866.78	58.5086		1170.37	35.4293		1049.06	48.8993		2835.46	12.3614		1073.66	13.602		1132.45	11.6927		1100.55	27.0015		1211.5	60.6065		1033.92	32.9118		1832	9		1036	9		1122	14		1042
	1062.17	35.0092		1035.94	20.2081		1084.32	18.4969		1845.58	13.3165		2590.31	114.272		1204.09	56.7367		1050.95	52.0238		1758.46	9.54986		1481.7	5.12375		2687.77	4.83624		1354.29	23.1519		1866.68	28.06		1082.23	13.5643		1833	14		1036	12		1190	14		1091
	1062.31	20.4384		1045.4	27.2339		1086.36	38.0448		1847.6	5.78315		2683.07	42.2379		1228.8	37.0756		1057.23	42.6836		1833.28	21.1764		2683.58	4.66663		2833.42	5.28287		1441.17	52.9348		1315.14	40.1809		1324	44.3895		1837	10		1037	11		1261	18		1101
	1069.44	45.2375		1049.23	21.379		1096.06	53.0183		1855.61	7.97445		2685.47	6.54967		1230.68	24.3492		1057.53	34.4756		2717.04	14.7956		1093.4	6.31767		2599.05	5.32852		1683.72	31.2315		1073.6	21.3427		1431.89	43.1391		1841	12		1044	21		1291	15		1143
	1071.61	62.189		1058.33	30.8064		1102.36	48.3686		1861.05	10.7064		2686.65	8.60492		1243.8	93.2076		1059.78	26.9885		1882.05	16.7533		1012.82	10.151		2708.59	5.42801		2855	36.6381		1351.34	19.1501		1003.2	58.6496		1842	11		1051	15		1417	15		1157
	1073.08	27.4176		1082.88	36.7741		1109.84	52.0141		1866.9	9.72567		2687.51	17.7069		1299.83	69.0122		1061.01	37.4594		2666.38	22.9055		1026.91	13.0184		1073.14	10.9566		1331.54	59.828		2710.05	10.1679		2751.52	9.78496		1844	12		1051	18		1796	16		1171
	1075.6	33.2912		1083.03	32.5326		1110.14	47.583		1868.17	10.4863		2689.62	21.945		1456.42	18.045		1062.31	39.2553		1868.65	13.9287		2723.31	3.98792		2729.47	5.03231		3123.15	15.912		1099.89	20.6519		1400.74	17.7691		1844	11		1054	9		1812	15		1181
	1076.72	22.8859		1083.21	20.0613		1134.18	21.5432		1870.29	5.23037		2690.19	10.7754		1510.39	16.4575		1068.66	45.9068		1936.27	52.5019		1029.94	13.4301		2704.45	5.21815		3037.85	16.0277		2717.21	11.0988		1046.07	9.59581		1852	12		1054	12		1822	9		1185
	1086.31	20.1083		1090.3	20.866		1165.98	43.5274		1872.07	8.27006		2691.14	12.7959		1683.19	12.5142		1070.18	54.8785		1234.36	30.6266		1029.61	9.66232		2705.58	5.1803		1164.14	52.3049		2729.43	9.63829		1587.93	295.824		1854	8		1054	8		1832	12		1312
	1087.9	72.0078		1097.96	48.2122		1178.83	20.2365		1901.32	13.9286		2693.97	68.3712		2566.65	4.72342		1079.74	28.4363		2846.9	12.1582		1278.21	11.3514		2701.42	4.68521		3020.3	20.3843		1099.38	23.3088		1030.79	24.8866		1855	12		1055	14		2661	8		1316
	1092.23	41.4797		1100.65	30.2078		1245.78	10.2315		1905.31	8.27626		2694.84	53.7392		2593.74	7.88794		1080.69	35.0493		1833.17	10.4203		2694.85	8.84348		2693.33	4.83834		1631.44	51.0842		2680.32	4.48715		1080.62	12.5675		1858	8		1058	6		2679	14		1370
	1092.49	58.7588		1103.14	24.279		1261.79	19.9573		2575.31	7.06651		2696.17	10.0164		2596.76	13.2393		1081.91	45.304		1843.51	15.0758		1076.66	11.6929		2726.91	5.07219		1684.79	54.9943		1246.93	39.2504		1379.56	32.9542		1864	12		1058	20		2689	8		1370
	1096.78	29.0589		1111.16	37.2114		1349.84	8.64998		2582	13.1155		2696.64	27.632		2617.53	6.03536		1084.29	45.39		2697.86	12.723		1065.34	11.7273		2637.66	4.6018		1660.38	50.2033		1127.29	44.6479		1153.99	30.7896		1866	11		1065	8		2694	8		1003
	1103.93	22.2335		1112.77	44.9451		1477.2	19.0079		2582.03	12.0084		2697.38	4.61864		2619.98	6.75397		1084.99	28.6419		1852.6	9.42644		2822.54	9.93155		2652.76	6.87524		2818.39	20.5899		2682.24	8.91842		1018.04	13.9413		1872	11		1067	12		2700	9		1035
	1104.45	61.9949		1134.55	31.296		1489.92	18.1133		2608.94	4.2972		2697.84	58.8849		2628.35	7.76492		1089.82	32.2406		2100.17	9.44154		1159.2	12.2677		2904.54	6.92061		1108.64	32.2212		2697.33	10.4734		1367.55	35.1311		1886	14		1069	18		2708	9		1047
	1109.23	26.7926		1140.79	35.4648		1829.88	15.2572		2640.2	8.71966		2697.9	66.515		2641.38	4.79005		1092.35	50.5616		1857.72	10.9721		1082.51	19.4964		1027.42	11.1665		1801.83	31.4496		2681.49	2.10644		1055.4	21.2013		1961	10		1079	15		2712	8		1051
	1119.8	45.4928		1143.98	27.8308		1836.86	12.4364		2667.43	2.80732		2697.95	55.2485		2642.66	13.8938		1100.17	41.0539		2309.69	14.7674		1091.02	6.70463		2684.89	7.63444		1214.35	55.3003		2641.07	2.94024		1417.05	20.9642		2031	9		1080	8		2718	8		1053
	1146.35	54.8524		1144.17	27.8449		1837.53	7.07927		2672.66	1.91378		2699.13	16.5435		2643.37	3.15096		1100.58	30.1308		1732.6	39.311		1840.56	4.93323		2686.23	7.04692		2929.91	26.3666		1099.18	33.9912		1074.59	24.4211		2522	6		1083	14		2718	9		1056
	1150.9	42.5405		1144.86	19.8811		1841.39	11.5357		2687.37	23.364		2699.5	38.9138		2644.96	2.32075		1101.33	40.4958		1882.91	11.6983		1127.83	7.21319		2915.6	7.48954		1312.58	50.9004		2711.24	13.4328		1622.67	17.055		2618	6		1090	24		2721	9		1057
	1155.63	30.7838		1150.79	23.2846		1858.77	8.57625		2688.87	11.1253		2699.79	8.9337		2649.42	4.65218		1119.83	36.5458		1868.45	16.0438		1164.86	8.85498		2853.95	7.37864		1486.81	27.3125		1843.83	5.58071		1049.66	10.704		2646	6		1090	17		2721	11		1062
	1161.01	49.182		1156.04	19.8454		1872.2	5.9275		2689.64	10.6039		2700.62	9.43155		2654.68	8.7636		1136.63	47.0101		1862.51	9.97503		2742.74	4.70684		2983.16	7.55744		1158.12	68.5171		1079.77	22.5817		1072.28	31.6632		2651	9		1092	13		2725	14		1062
	1161.75	41.8403		1157.9	34.3239		2415.92	22.8652		2693.04	7.14069		2700.98	51.8837		2655.12	5.5058		1150.57	33.252		1823.04	11.3622		1073.58	8.12868		2838.37	7.04245		2836.63	16.3068		2775.76	6.57472		1077.04	20.3585		2656	10		1095	18		2730	12		1088
	1165.56	25.9585		1166.42	59.0528		2614.91	11.288		2696.73	3.10506		2703.37	8.61449		2657.54	7.48401		1169.96	46.0486		2297.53	28.8982		3192.09	4.17158		2695.62	7.48064		1315.24	28.5867		2691.62	10.0082		1394.28	14.2838		2657	8		1126	21		2746	14		1092
	1167.72	32.1245		1173.95	19.7949		2655.2	2.73851		2696.89	9.31113		2703.39	4.5627		2662.23	13.3071		1188.43	43.9166		1836.72	15.4713		2725.35	4.94304		2682.27	10.5401		1154.57	52.8154		1111.51	58.4444		1191.46	73.674		2667	7		1126	19		2748	10		1170
	1169.64	29.5097		1179.93	21.9552		2670.93	5.77196		2697.52	4.23589		2706.53	15.5362		2662.89	10.513		1197.61	32.8861		2586.21	8.2804		1118.12	6.79991		2718.16	7.69001		1543.81	18.8345		2678.15	5.55681		2756.86	94.5676		2676	8		1141	18		2770	16		1186
	1172.53	37.6079		1184.66	50.9847		2674.7	3.36061		2699.37	11.4643		2707.53	17.0789		2664.61	14.4081		1226.31	35.5452		1827.87	13.7498		1204.4	6.00417		2678.21	7.15181		1142.93	46.8242		1207.69	193.77		1132.03	13.6397		2678	10		1143	33		2789	9		1271
	1174.54	21.1757		1188.61	23.5202		2676.9	1.9473		2699.77	8.48939		2707.56	30.3808		2667.48	3.27186		1229.81	45.4027		1829.53	11.6535		1148.99	5.53331		2763.58	10.023		2794.51	26.3773		2725.81	20.8815		1051.76	13.446		2679	6		1143	7		2649	13		1329
	1175.56	21.2014		1198.12	45.954		2677.37	2.41814		2700.1	7.85839		2707.75	6.90719		2668.4	10.5909		1230.05	31.164		1840.62	11.8097		1061.25	5.98091		2699.74	9.80306		1473.11	52.9632		2698.39	4.25605		1055.95	39.3497		2680	9		1143	10		2731	15		1744
	1176.73	34.7113		1208.92	51.7013		2677.63	3.85703		2700.25	3.98864		2708.29	15.1769		2668.64	4.3125		1234.14	24.7572		1829.05	20.5435		1356.33	9.21314		1076.1	11.9983		1158.42	58.8275		2725.79	6.24233		1393.77	26.9655		2680	9		1147	18		2909	7		2679
	1178.55	30.0618		1212.58	37.5986		2685.82	2.00495		2701.34	6.23989		2708.31	34.4149		2669.17	12.513		1302.17	26.9177		1878.76	17.9392		1091.83	6.18834		2741.09	10.1651		1110.12	34.3991		2681.12	4.84153		2705.35	5.86421		2681	9		1166	37		2819	6		2696
	1178.74	31.101		1217.01	40.1249		2691.85	8.29126		2701.73	16.4981		2708.58	34.6654		2672.43	5.36701		1309.97	41.885		2715.44	16.0421		1024.74	5.37774		3034.91	9.45874		1121.23	28.5295		2664.59	3.88319		1078.76	6.5097		2683	11		1174	33		2898	14		2696
	1189.93	19.7631		1224	70.9848		2692.04	3.60144		2702.28	5.43408		2709.24	73.0053		2674.07	2.55536		1316.3	36.4267		1722.11	12.0556		2816.71	3.93997		2736.24	9.99016		2774.59	21.153		1364.79	30.0068		1049.83	14.192		2684	10		1205	18		2697	13		2694
	1193.34	60.0106		1228.32	31.2189		2692.82	2.71879		2703.87	4.43966		2710.05	21.8763		2674.34	12.7198		1323.67	44.9391		2603.14	13.3244		2710.71	3.3395		1351.36	12.8817		1067.05	52.6823		1086.37	41.5518		1196.1	17.3443		2686	8		1226	13		2679	10		2722
	1197.01	47.35		1234.31	73.0083		2693.75	4.51564		2704.88	16.4146		2710.23	11.2476		2674.54	8.36726		1349.64	32.8149		1877.92	21.0366		1157.47	6.1865		2727.53	10.5049		2745.56	18.2655		1077.74	13.9143		1049.46	11.49		2686	8		1234	8		2821	10
	1197.83	57.8478		1245.36	53.6753		2696.82	7.80748		2705.04	3.67912		2710.4	33.7306		2675.44	4.39186		1355.45	24.9181		2546.07	18.8577		2743.7	3.6073		2695.23	10.3113		1102.2	28.6421		2692.49	20.4646		1102.75	15.7088		2689	9		1290	12		2802	11
	1202.07	28.7064		1257.19	31.3089		2698.16	6.2486		2705.11	6.79501		2710.47	15.5635		2676.77	2.74811		1424.83	39.3502		1801.57	17.067		1267.38	7.70644		2702.7	12.1335		2781.64	29.1851		2576.93	7.25831		1043.13	63.7972		2690	6		1294	12		2698	10
	1204.93	34.0466		1291.41	43.0383		2699.64	8.31436		2706.32	5.61473		2711.86	16.8317		2677.26	12.6081		1460.31	48.225		2316.21	15.2388		1101.22	7.40865		2736.2	9.50064		1333.93	28.7087		2699.02	3.30083		2709.62	3.21081		2691	12		1317	9		2740	13
	1210.76	43.9125		1294.7	35.8071		2700.3	5.34852		2707.23	5.76421		2712.09	21.8436		2678.22	13.9122		1851.72	50.2581		2724.46	25.4144		2784.48	5.40295		2695.73	9.52269		2712.69	21.6268		1076.4	29.0692		1393.52	21.9708		2693	10		1321	16		1852	11
	1215.04	25.913		1296.1	53.2993		2700.41	4.61023		2707.88	3.83953		2712.33	82.5553		2679.35	3.83407		1861.23	27.8048		2121.35	8.95309		1689.03	10.0778		2815.43	8.54067		1296.05	38.0314		2735.82	15.636		2742.68	5.53693		2695	8		1347	19		2696	10
	1216.74	25.3809		1303.53	26.2235		2701.14	4.79068		2709.01	5.1446		2712.72	17.9407		2679.74	5.51716		2565.07	33.5034		2716.5	8.14292		2720.54	5.20639		2650.58	8.26615		1312.93	33.319		2708.54	4.38223		1055.62	23.0208		2698	8		1367	14		1092	20
	1221.65	25.5559		1323.52	19.3872		2701.32	17.0749		2710.45	2.94774		2712.85	16.7327		2683.42	4.97429		2604.95	24.4248		1832.74	9.9714		1202.08	6.74347		2691.02	7.49461		1375.08	27.5705		1092.86	14.8462		1235.93	67.7699		2698	8		1369	11		1051	23
	1221.83	42.6661		1328.08	36.592		2701.74	9.82939		2711.34	2.82782		2714.62	18.0893		2683.73	13.5838		2615	19.1597		1811.05	14.5206		1396.55	7.82597		2675.83	7.35227		2700.69	18.616		1076.11	38.2934		1071.94	14.2817		2699	9		1385	16		2736	9
	1222.04	21.6315		1335.14	27.087		2703.66	3.3489		2711.43	3.7267		2716.09	22.866		2683.8	7.26224		2620.32	30.1558		1928.28	10.785		2678.66	4.96945		2807.63	7.12737		1724.14	23.0333		1098.04	38.6106		1660.75	8.29158		2700	10		1389	13		2752	8
	1237.59	19.644		1335.54	19.3485		2704.46	3.31669		2711.66	3.72999		2716.8	40.6521		2686.3	6.86551		2625.29	22.8166		1875.03	23.893		2664.58	4.61838		2711.44	7.30391		1351.24	31.2946		1251.36	41.9878		2697.6	8.60827		2700	12		1393	13		1119	14
	1238.27	33.7882		1337.98	53.2201		2705.56	2.82024		2717.41	3.48659		2717.58	27.5413		2686.78	3.77199		2636.17	29.3515		1841.47	12.1691		1347.3	6.02188		2715.69	7.76677		1351.87	25.3241		1887.3	7.70845		1045.07	16.0587		2701	8		1419	6		2707	9
	1248.11	36.2452		1347.58	19.3072		2706.57	2.2584		2718.3	5.34029		2717.61	34.2847		2687.19	13.6174		2636.86	23.6952		2657.25	18.3878		1148.3	8.67609		1075.79	10.1239		1214.74	72.2772		1082.01	21.0235		1124.86	67.6762		2701	8		1421	16		1082	19
	1250.57	24.469		1352.38	30.1136		2707.93	3.14438		2720.15	9.38312		2718.24	2.51026		2691.7	4.75377		2638.7	35.178		2333.22	15.7063		1162.51	10.0923		2702.59	8.63183		2702.72	29.2193		2726.54	5.83289		1044.8	74.2469		2701	6		1457	12		2672	8
	1252.37	48.9552		1362.37	31.5966		2708.03	4.34683		2720.65	11.6032		2718.31	15.2951		2692.13	3.86208		2645.1	24.2404		1883.09	39.9243		1174.08	6.70137		2697.66	7.31178		1431.32	23.0015		1471.54	74.4652		1331.6	28.2874		2704	9		1496	6		2717	6
	1265.46	38.8843		1378.72	20.2683		2709.01	3.7068		2721.01	5.74475		2718.52	19.1571		2694.3	6.06577		2645.15	30.5055		1864.32	9.82462		2820.33	4.48485		2684.54	7.32921		1228.55	47.6338		2745.45	7.81183		1362.59	178.444		2704	9		1518	31		2711	6
	1272.69	44.3346		1392.07	41.4481		2709.31	2.34939		2721.75	2.73584		2718.62	32.2199		2694.53	3.84344		2648.33	23.2741		1901.66	12.0218		1106.23	5.60561		2744.81	6.79391		1257.46	19.5746		2705	3.01394		1205.11	49.5004		2704	8		1600	16		2703	6
	1276.84	23.8468		1392.48	24.8045		2710.48	6.5439		2721.92	3.50421		2719.21	19.3963		2694.99	13.4055		2649.46	19.5651		2715.1	15.0297		1049.34	7.10582		2695.76	6.7243		1414.71	31.5488		1080.15	32.0735		1446.28	18.5038		2706	11		1629	31		1074	21
	1316.32	54.3172		1397.23	29.544		2710.78	2.12157		2722.73	9.98439		2721.32	6.02114		2695.07	4.57726		2651.77	27.1634		2726.38	11.3002		1391.96	6.38354		2727.39	6.76992		1475.82	31.8752		2703.05	4.51692		1452.81	11.8363		2707	9		1854	11		2708	6
	1337.03	35.3878		1398.11	24.7562		2710.87	2.84466		2724.75	3.20322		2721.61	83.0636		2696.25	6.50892		2653.25	25.2538		2094.19	15.8641		2704.7	4.59664		2711.13	6.90589		1215.67	40.1189		2717.23	6.24667		1321.65	26.2629		2708	9		1861	34		2681	6
	1341.49	28.6151		1406.67	24.3181		2711.15	4.2422		2725.63	15.5969		2723.81	27.6639		2696.52	5.01714		2653.29	19.2684		542.658	15.3937		1292.67	8.03326		2680.27	7.14401		2699.4	21.7968		2781.1	4.03381		1341.59	6.79761		2708	8		2544	9		2777	7
	1361.8	36.4289		1408.23	50.5718		2711.67	8.17124		2726.89	11.0509		2724.25	43.1078		2697.07	3.50688		2661.29	28.3914		2593.08	14.492		1335.4	5.59306		2702.44	7.44008		2691.15	28.2771		2671.43	3.14302		1076.52	24.3694		2709	10		2633	6		2690	8
	1372.31	19.2582		1417.03	78.8926		2711.88	9.17293		2727.86	5.34302		2724.83	13.0624		2698.45	7.81504		2661.65	28.6606		2014.05	62.5294		2716.76	4.35086		2802.62	6.73889		2758	18.7534		2718.57	10.8565		1395	27.1743		2709	9		2633	6		2817	8
	1403.05	27.2082		1459.62	40.1146		2712.23	2.84204		2729.14	9.13819		2726.95	58.3271		2699.18	10.2555		2666.17	37.6519		2712.25	16.1951		1080.3	7.76742		2744.39	6.6777		1276.9	48.8066		1054.92	26.9061		1079.85	24.6443		2709	7		2635	7		1305	14
	1416.53	19.1267		1459.67	23.3851		2712.35	4.35221		2729.92	3.03796		2727.13	25.1006		2699.56	3.58744		2667.58	13.5821		2735.48	10.4299		1017.09	7.77409		1140.6	11.3473		1152.03	31.7484		2688.18	6.80372		1017.64	13.1544		2710	8		2654	6		1510	18
	1420.23	56.4746		1466.29	26.0228		2712.58	7.42704		2730.1	2.74347		2727.57	9.99661		2699.67	9.24225		2668.55	22.0303		1863.9	11.4507		1154.82	6.9035		2708.37	8.07077		1133.57	64.4825		2737.21	10.9703		1392.21	14.4943		2711	8		2673	6		2702	12
	1421.94	34.9746		1475	26.3727		2712.79	3.95069		2731.15	12.446		2727.7	46.7027		2699.75	3.94473		2670.99	37.7618		1870.78	12.4854		1678.98	7.1397		2749.14	7.05618		2747.02	34.8568		1194.91	32.5417		1147.68	162.798		2712	9		2681	9		1140	25
	1424.92	56.2007		1475.59	25.6109		2714.2	11.3113		2732.58	7.91639		2728.05	29.0629		2700.14	12.5394		2671.21	25.6201		1853.25	13.8		1080.02	7.62294		1077.19	10.4678		1377.46	40.098		2744.41	6.5379		1177.91	120.507		2712	8		2683	31		1861	14
	1427.67	27.1342		1478.11	33.5695		2717.78	6.67338		2732.66	8.67284		2729.34	101.632		2700.33	7.10035		2674.01	29.0356		2666.5	11.3951		1068.11	6.32019		1187.3	10.7452		2772.22	22.9871		2681.75	3.10361		1079.63	21.094		2714	9		2683	9		2656	11
	1430.2	44.1376		1483.05	28.807		2718.27	4.16939		2733.03	6.06858		2730.03	32.7257		2700.65	4.3933		2685.47	27.0911		1849.49	20.7634		1182.23	5.76961		2713.82	7.74335		1158.05	24.6578		2685.52	3.95546		1067.89	27.4905		2714	8		2683	16		1060	18
	1441.34	36.4058		1487.23	36.3811		2718.36	3.2191		2734.79	11.2717		2730.32	46.7233		2703.72	2.42611		2685.81	26.5297		1841.64	12.1218		1143.73	5.63503		2696.71	7.47348		2762.34	24.3004		1352.76	9.22437		1064.47	22.6781		2716	9		2688	10		2727	12
	1460.11	36.8889		1495.52	41.245		2718.69	5.40561		2735.52	6.11185		2731.02	57.5784		2704.94	6.34776		2686.15	21.5845		1707.89	9.46443		2706.95	4.30126		2747.58	7.41575		2774	19.1975		2768.72	28.257		1070.23	14.4745		2717	10		2690	11		2702	11
	1465.82	68.8333		1496.25	18.9202		2719.3	5.50231		2736.02	4.32171		2732.48	63.1243		2705.18	6.24005		2688.98	19.0735		1967.89	12.3074		1003.99	13.0009		2713.53	6.67886		1144.46	64.878		1059.83	40.9945		1168.64	22.3537		2718	8		2695	9		2682	10
	1473.95	40.8201		1497.14	36.3224		2719.84	2.16756		2736.57	3.68041		2732.8	26.7846		2705.72	5.35132		2689.44	30.0248		1873.13	16.4357		2701	4.48833		2681.23	6.97019		1191.14	28.6502		2715.26	7.99315		1084.75	71.5205		2720	10		2698	11		2697	9
	1474.83	67.2134		1499.03	36.6937		2720.86	21.1213		2738.37	12.7171		2733.16	24.239		2707.57	3.65528		2690.14	21.704		2486.55	25.1606		2630.97	4.82361		2719.83	6.64984		2828.33	24.8037		2700.97	7.05093		1384.91	22.7786		2721	9		2702	10		2843	10
	1476.4	18.9793		1507.85	29.8455		2721.58	18.2764		2739.77	17.1322		2738.06	30.0736		2709.77	5.33378		2691.64	22.8306		1831.47	11.8984		1242.84	6.46229		2762.42	6.39306		1060.7	20.3063		2660.86	2.61743		1478.44	20.4982		2721	7		2717	5		2680	10
	1484.47	34.4954		1508.16	33.8158		2721.76	2.21854		2742.01	4.10978		2741.09	23.7038		2709.91	5.38185		2691.68	24.114		1804.76	21.6308		1234.83	7.34817		1097.62	11.4839		1464.11	53.6214		1067.98	19.1861		1062.13	28.773		2722	9		2722	14		2732	12
	1486.33	29.5528		1512.14	18.8822		2722	10.3671		2744.54	10.1716		2741.9	11.4096		2712.91	33.9945		2692.09	31.4339		1783.94	12.802		1086.59	6.80495		2733.43	7.6805		1199.32	28.5824		2708.51	11.4411		2696.47	12.3516		2724	9		2727	14		1078	17
	1486.37	36.3721		1512.5	21.5196		2722.96	4.21818		2745.31	10.7254		2741.91	14.6371		2713.64	4.96427		2692.28	30.8886		1923.53	12.0273		1072.07	9.11285		2723.75	7.20065		1140	35.459		1092.55	48.5371		1083.69	27.3513		2724	8		2727	10		1916	14
	1488.22	23.3209		1521.57	28.2845		2723.99	9.38343		2755.56	5.85809		2742.66	47.2086		2718.55	11.6095		2693.06	25.9925		1935.72	9.50242		2650.3	3.0543		2705.38	4.58528		1429.03	84.8241		2828.13	4.98147		2585.9	25.7965		2725	11		2730	10		2696	10
	1490.68	52.8536		1540.69	18.8067		2724.83	4.42139		2829.34	7.5943		2743.3	22.6398		2720.94	4.22013		2693.99	22.6198		1757.99	11.6103		1437.85	4.24732		2787.02	4.28763		1444.88	48.0424		1047.49	50.3592		1588.5	82.4398		2726	12		2731	9		1278	12
	1491.1	83.5941		1554.32	34.5436		2726.68	6.32422		2857.56	3.27932		2743.93	15.9188		2723	37.7885		2694.05	26.0501		2309.11	12.5955		985.791	13.2556		2752.31	4.43882		2717.52	17.477		2729.25	5.00359		1320.33	21.444		2726	8		2749	11		2694	11
	1491.97	69.7421		1631.91	28.9983		2728.09	4.85026		2880.57	11.2089		2743.98	23.5597		2730.25	7.85799		2696.41	26.4187		2076.8	15.6848		2709.6	2.85326		2726.72	3.37218		2939.91	20.8514		1066.46	43.6712		1167.38	67.9225		2726	9		2752	13		2709	9
	1491.98	20.8219		1640.68	18.5623		2729.61	2.28001		2924.79	7.40194		2746.16	31.3277		2737.26	8.48927		2697.7	26.915		2002.41	18.248		1046.46	6.63469		2693.46	4.70724		1294.73	31.3352		1486.95	22.204		1206.42	26.8494		2726	9		2769	16		1194	13
	1493.01	45.8131		1644.57	40.4709		2731.33	4.35671		2924.99	2.79542		2748.25	53.1757		2751.21	15.8542		2698.62	25.9924		1803.92	17.8038		1056.99	7.13235		2707.58	4.94212		2920.22	20.3936		2674.16	5.26097		1275.79	46.5643		2727	8		2778	11		2707	8
	1497.66	27.0491		1659.42	22.4417		2735.6	5.60828		2930.14	3.39338		2756.82	33.6766		2757.81	23.1413		2702	27.5062		2607.55	11.0636		2672.26	5.27395		2719.16	9.07626		2862.89	26.0656		1088.69	29.0213		1158.42	20.4607		2732	10		2831	11		2796	10
	1510.69	55.1431		1680.02	33.9968		2738.86	5.31975					2761.65	21.4772		2780.34	6.51541		2709.66	24.3441		1840.62	13.3151		995.381	12.6398		2636.85	3.3203		1149.21	32.0719		2703.7	2.05675		2773.51	13.7348		2734	7		2831	16		2703	8
	1522.95	25.0842		1764.88	20.2829		2739.67	12.3635					2767.58	30.3713		2793.85	6.77998		2710.74	27.6961		2718.22	12.2083		1356.72	5.85192		2719.1	8.38931		2919.48	18.1311		2687.06	5.11072		1263.22	17.3418		2737	9		945	64		2726	10
	1549.99	50.0329		1914.85	30.506		2740.12	3.34532					2780.9	58.9785		2817.37	2.13304		2710.9	25.9583		2721.31	10.5806		1017.6	10.3078		2690.2	4.00428		1392.03	36.4837		2619.57	5.04552		1373.05	47.2088		2739	11		957	49		2747	10
	1654.66	137.924		2001.74	26.2874		2740.25	7.93965					2781.57	62.6978		2820.01	4.87997		2718.46	36.7091		2061.39	14.2956		2681.24	4.60335		2727.87	3.83142		1406.38	28.7343		1096.49	42.5804		2438.86	10.9437		2739	7		997	11		1098	12
	1666.89	57.3621		2552.31	52.7639		2745.39	6.95406					2782.27	31.0518		2974.99	4.35652		2721.84	44.9065					2668.1	4.33162		1765.66	5.07444		1159.21	35.15		2691.98	4.29483		1069.49	14.7806		2744	10		1001	49		2729	8
	1701.1	39.7958		2721.27	25.8743		2746.34	4.58764					2801.37	55.1398		3163.05	5.37424		2728.36	29.6667					998.104	11.5547		2684.59	3.63859		2628.82	26.448		2683.74	5.54816		1323.09	24.9052		2748	7		1012	48		2735	8
	1772.63	28.4823		2743.81	16.4527		2748.83	8.79311					2801.57	12.4274					2748.65	26.7401					1050.36	6.43276					2819.95	26.1387		1250.44	63.3321		1016.02	66.4403		2750	10		1018	15		1124	14
	1884.53	84.7563		2977.51	16.104		2750.18	3.82613					2815.83	39.3137					2767.31	25.2527					1364.63	6.45809					2829.97	20.3931		1454	11.0164		1091.36	97.6772		2752	10		1019	12		2706	7
	2756.35	24.8146		3302.7	24.1551		2775.7	80.6764					2847.4	30.1916					2778.99	63.1554					2586.06	4.37424					1063.49	61.3027					1025.55	55.104		2765	11		1020	18		1877	11
							2790.48	2.91346					2892.13	14.9644					2867.76	28.449					1106.23	7.56726					1074.9	47.8294					1069.66	31.4213		2777	9		1022	13		2707	7
							2802.94	10.196					2935.49	14.6622					3058.48	33.4052					2733.77	5.72442					2790.48	55.2356					1103.44	20.5065		2789	9		1025	62		2685	6
							2904.46	13.7425					3008.93	54.3996																	1179.65	73.9743					1020.84	73.514		2790	9		1028	15		1040	10
							2972.48	1.58502																							1146.11	37.5934					1090.97	43.1763		2797	13		1031	48		1110	16
							3110.84	9.24136																							1139.01	56.1021					2722.07	13.6721		2804	6		1031	12		2686	6
																															1805.55	36.2004					1180.67	65.1438		2821	9		1035	18		2721	7
																																					1051.23	20.3246		2849	9		1039	11		1199	18
																																					1117.64	94.9396		2871	7		1041	13		2674	10
																																					1516.69	12.199		3041	7		1047	18		2636	10
																																					1403.59	24.746		1033	22		1048	14		2699	14
																																					1100.66	55.4438		1076	30		1049	10		2669	11
																																					1399.46	27.9826		1134	39		1055	61		1112	17
																																					1192.63	27.7276		1248	29		1056	20		2682	10
																																					1175.81	46.9721		1286	20		1057	48		2709	15
																																					1108.79	66.8515		1308	20		1059	16		1131	22
																																					1444.48	28.8352		1318	17		1062	62		2718	14
																																					1722.25	13.5607		1326	17		1065	18		1225	18
																																					1345.7	13.0068		1331	22		1069	47		2750	16
																																					1088.93	13.0227		1336	22		1072	50		1108	23
																																					1100.14	41.9557		1364	16		1075	14		2665	14
																																					2630.17	4.86416		1382	30		1091	17		2703	14
																																					1053.83	167.895		1397	30		1093	15		1144	35
																																					1019.57	73.0688		1406	21		1102	16		2714	10
																																					1028.67	18.1124		1407	33		1105	15		1123	15
																																					1122.75	52.55		1408	37		1108	14		1078	13
																																					2647.87	2.71226		1408	35		1122	19		1100	18
																																					1206.94	18.0153		1416	35		1125	47		1181	26
																																					2692.61	20.1916		1497	32		1129	62		1460	16
																																					1237.18	61.8776		1529	22		1147	12		1103	18
																																					1081.26	24.4127		1603	17		1149	48		1109	22
																																					1343.2	46.7774		1616	14		1151	10		2736	13
																																					1176.7	45.7492		1634	19		1156	16		1096	20
																																					1745.49	10.6153		1639	31		1156	21		2694	15
																																					2619.02	10.1223		1650	16		1163	11		1052	21
																																					1025.78	13.4402		1660	20		1166	11		1310	19
																																					1214.34	14.5361		1661	32		1167	14		2750	15
																																					1050.53	27.9809		1676	26		1169	13		1332	19
																																					1546.85	39.4704		1690	21		1170	18		2661	14
																																					1424.79	76.9222		1699	19		1172	10		2619	15
																																					1053.96	39.9938		1751	15		1207	18		2737	15
																																					1042.87	37.3205		1772	35		1212	15		1648	17
																																					1101.41	106.481		1789	19		1218	47		2690	6
																																					1060.1	27.2591		1814	17		1233	61		1327	16
																																					2692.94	7.23276		1817	30		1238	19		1121	11
																																					1084.9	41.3314		1875	14		1246	20		2688	7
																																					1372.83	15.6435		1886	30		1248	18		1459	11
																																					1069.44	62.4406		2651	27		1266	50		1296	23
																																					1095.83	42.777		2656	14		1267	16		1227	16
																																					1464.95	40.0701		2660	15		1271	11		1099	9
																																					974.746	59.4718		2665	12		1278	62		2487	7
																																					1030.04	70.9155		2670	22		1285	15		1019	14
																																					1310.05	149.028		2673	28		1289	12		1134	14
																																					1055.22	25.9658		2681	10		1312	59		2806	10
																																					1029.73	67.8069		2682	27		1325	46		1176	13
																																					2672.79	9.93161		2682	15		1325	14		1866	10
																																					2707.08	23.007		2686	23		1342	11		2688	10
																																					2702.01	9.31943		2688	13		1347	16		1011	12
																																					2701.71	5.7372		2690	27		1366	13		1973	10
																																					1429.18	17.0202		2693	28		1373	13		1479	11
																																					1380.36	19.2929		2694	11		1376	15		2954	12
																																					1444.46	18.4501		2698	31		1405	58		1377	16
																																					1062.65	31.0377		2698	15		1406	11		2720	8
																																					1438.76	20.0735		2700	27		1431	58		1473	9
																																					1055	29.2157		2700	15		1436	13		1372	11
																																					1131.51	94.5412		2701	31		1437	9		2684	7
																																					1336.49	89.4867		2702	11		1442	12		1171	13
																																					1031.21	47.841		2702	12		1447	13		2990	6
																																					1082.3	23.6493		2704	10		1465	8		1354	11
																																					1296.72	32.8081		2704	15		1466	16		2767	9
																																					2709.36	6.4325		2705	28		1469	10
																																					1161.47	57.9625		2705	12		1487	8
																																					1146.58	50.8124		2705	12		1531	13
																																					1248.2	40.8066		2706	14		1547	46
																																					2523.24	13.3201		2707	27		1554	14
																																					1225.88	59.4379		2707	16		1573	45
																																								2709	11		1637	12
																																								2713	32		1642	44
																																								2715	17		1692	44
																																								2715	14		1747	11
																																								2726	15		1837	9
																																								2729	31		2500	40
																																								2729	13		2593	7
																																								2730	17		2594	8
																																								2731	31		2616	8
																																								2731	18		2631	13
																																								2733	11		2638	13
																																								2735	16		2640	40
																																								2736	15		2646	38
																																								2737	16		2653	13
																																								2743	17		2660	39
																																								2757	12		2666	51
																																								2762	27		2686	15
																																								2786	11		2689	14
																																								2794	23		2690	38
																																								2808	14		2696	8
																																								2814	31		2711	10
																																								2835	17		2712	14
																																								2870	26
																																								1074	16
																																								1125	13
																																								1147	18
																																								1324	14
																																								1333	13
																																								1350	12
																																								1388	31
																																								1397	32
																																								1407	16
																																								1411	30
																																								1440	12
																																								1445	10
																																								1449	13
																																								1509	40
																																								1523	30
																																								1590	30
																																								1631	29
																																								1642	10
																																								1646	10
																																								1770	29
																																								1791	14
																																								1799	11
																																								1820	10
																																								1858	9
																																								1872	7
																																								2655	25
																																								2662	24
																																								2664	23
																																								2665	9
																																								2673	11
																																								2675	7
																																								2676	25
																																								2677	9
																																								2677	12
																																								2681	11
																																								2682	12
																																								2684	24
																																								2685	9
																																								2687	12
																																								2691	8
																																								2692	7
																																								2693	24
																																								2694	9
																																								2697	7
																																								2698	9
																																								2700	7
																																								2703	10
																																								2704	12
																																								2704	9
																																								2706	25
																																								2709	25
																																								2709	11
																																								2710	11
																																								2710	8
																																								2711	9
																																								2711	24
																																								2712	8
																																								2713	10
																																								2715	11
																																								2715	7
																																								2716	26
																																								2719	12
																																								2720	12
																																								2721	14
																																								2721	12
																																								2722	11
																																								2725	12
																																								2726	11
																																								2727	9
																																								2727	12
																																								2728	25
																																								2732	26
																																								2737	8
																																								2737	12
																																								2741	11
																																								2742	12
																																								2743	13
																																								2745	9
																																								2759	23
																																								2767	7
																																								2776	8
																																								2849	7
																																								2873	11
																																								2912	13
																																								2918	7
																																								1047	12
																																								1055	13
																																								1057	15
																																								1058	14
																																								1066	20
																																								1068	13
																																								1070	15
																																								1071	11
																																								1079	11
																																								1079	20
																																								1084	14
																																								1085	13
																																								1094	15
																																								1104	25
																																								1113	27
																																								1127	21
																																								1127	24
																																								1130	25
																																								1133	30
																																								1164	16
																																								1182	15
																																								1189	17
																																								1194	11
																																								1303	14
																																								1324	15
																																								1425	19
																																								1440	16
																																								1451	12
																																								1455	12
																																								1812	25
																																								1816	26
																																								1821	15
																																								1958	17
																																								2531	11
																																								2626	20
																																								2651	23
																																								2653	13
																																								2654	13
																																								2656	19
																																								2657	20
																																								2657	21
																																								2658	21
																																								2659	16
																																								2661	11
																																								2662	19
																																								2668	13
																																								2672	19
																																								2674	11
																																								2679	23
																																								2680	8
																																								2682	13
																																								2682	23
																																								2683	20
																																								2683	23
																																								2687	16
																																								2688	13
																																								2688	13
																																								2688	11
																																								2690	23
																																								2690	23
																																								2691	10
																																								2692	13
																																								2692	13
																																								2692	10
																																								2694	11
																																								2694	16
																																								2697	14
																																								2698	13
																																								2702	8
																																								2703	9
																																								2703	16
																																								2704	14
																																								2704	10
																																								2705	13
																																								2706	14
																																								2706	19
																																								2706	20
																																								2708	10
																																								2709	11
																																								2710	20
																																								2712	12
																																								2714	11
																																								2715	13
																																								2719	11
																																								2721	11
																																								2722	9
																																								2727	13
																																								2728	10
																																								2801	13
																																								2805	16
																																								2809	13
																																								2809	12
																																								2832	7
																																								2972	12
																																								3031	12
																																								3033	22
																																								3602	7
																																								995	17
																																								1030	22
																																								1049	14
																																								1059	12
																																								1060	20
																																								1072	15
																																								1078	25
																																								1089	21
																																								1093	16
																																								1094	20
																																								1101	32
																																								1108	15
																																								1134	23
																																								1145	18
																																								1153	20
																																								1173	15
																																								1215	13
																																								1255	14
																																								1293	13
																																								1321	12
																																								1352	16
																																								1353	15
																																								1502	15
																																								1510	13
																																								1718	28
																																								1811	14
																																								1881	9
																																								1883	13
																																								1888	13
																																								1890	10
																																								1896	7
																																								1900	9
																																								1943	27
																																								2053	25
																																								2375	16
																																								2645	6
																																								2650	11
																																								2663	13
																																								2663	11
																																								2665	12
																																								2671	6
																																								2671	7
																																								2672	24
																																								2672	8
																																								2672	8
																																								2674	11
																																								2674	6
																																								2675	8
																																								2676	25
																																								2677	8
																																								2679	10
																																								2682	12
																																								2683	12
																																								2683	13
																																								2690	9
																																								2691	11
																																								2691	8
																																								2694	6
																																								2694	13
																																								2697	5
																																								2697	8
																																								2698	11
																																								2699	12
																																								2699	12
																																								2699	25
																																								2699	12
																																								2700	8
																																								2702	6
																																								2702	12
																																								2703	13
																																								2704	10
																																								2705	10
																																								2706	8
																																								2706	9
																																								2708	25
																																								2708	11
																																								2709	8
																																								2710	11
																																								2710	5
																																								2710	25
																																								2711	6
																																								2712	11
																																								2714	5
																																								2718	7
																																								2718	8
																																								2720	6
																																								2721	8
																																								2723	5
																																								2726	11
																																								2727	6
																																								2732	13
																																								2732	12
																																								2733	7
																																								2736	8
																																								2750	12
																																								2752	11
																																								2763	6
																																								2797	9
																																								2800	7
																																								2806	9
																																								2849	12
																																								2893	12
																																								2918	13
																																								3174	5
[truncated: 85 more columns]

## Sheet: Silurian-Devonian
	For generating pie diagrams
	Inferred source	lower limit	upper limit		age ref
	1. Appalachian plutons	0	480		Park, H., Barbeau, D.L., Rickenbaker, A., Bachmann-Krug, D., and Gehrels, G., 2009, Application of Foreland Basin Detrital-Zircon Geochronology to the Reconstruction of the Southern and Central Appalachian Orogen, Journal of Geology, v. 118, p. 23-44.
	2. Suwanee/Meguma	540	700		Park, H., Barbeau, D.L., Rickenbaker, A., Bachmann-Krug, D., and Gehrels, G., 2009, Application of Foreland Basin Detrital-Zircon Geochronology to the Reconstruction of the Southern and Central Appalachian Orogen, Journal of Geology, v. 118, p. 23-44.
	3. Grenville crust	950	1300		Whitmeyer, S.J., and Karlstrom, K.E., 2007, Tectonic model for the Proterozoic growth of North America. Geosphere, v. 3, p. 220-259.
	4. OK-CO Aulacogen	530	540		Hanson, R. E., Puckett, R. E, Jr., Keller, G. R., Brueseke, M. E., Bulen, C. L., Mertzman, S. A., Finegan, S. A., & McCleery, D. A.,2013, Intraplate magmatism related to opening of the southern Iapetus Ocean: Cambrian Wichita igneous province in the Southern Oklahoma rift zone. Lithos, 174, 57-70.
	5. Granite/Rhyolite	1300	1500		Whitmeyer, S.J., and Karlstrom, K.E., 2007, Tectonic model for the Proterozoic growth of North America. Geosphere, v. 3, p. 220-259.
	6. Yavapai/Mazatzal	1600	1800		Whitmeyer, S.J., and Karlstrom, K.E., 2007, Tectonic model for the Proterozoic growth of North America. Geosphere, v. 3, p. 220-259.
	7. 1.8-2.0 Ga	1800	2000		Whitmeyer, S.J., and Karlstrom, K.E., 2007, Tectonic model for the Proterozoic growth of North America. Geosphere, v. 3, p. 220-259.
	8. Archean craton	2500	4000		Whitmeyer, S.J., and Karlstrom, K.E., 2007, Tectonic model for the Proterozoic growth of North America. Geosphere, v. 3, p. 220-259.
	5. Midcontinent rift	1096	1107	Paces and Miller (1993)
	Park et al. (2009)																					Chapman and Laskowski (2018 - this study)						Gray and Zeitler (1997); McLennan et al. (2001)			McLennan et al. (2001)			Thomas et al. (2017)			Eriksson et al. (2004)			Gehrels and Pecha (2014)
	Plate 2B sample #1	Silurian Tuscarora Fm.		Plate 2B sample #2	Silurian Rose Hill Fm.		Plate 2B sample #3	Silurian Keeper Fm.		Plate 2B sample #4	Devonian Oriskany Fm.		Plate 2B sample #5	Devonian Foreknobs Fm.		Plate 2B sample #6	Devonian Chemung Fm.		Plate 2B sample #7	Devonian Hampshire Fm.		Plate 2B sample #8	Devonian Bushberg Ss. (14MO4 - 15S, 727981E, 4248738N)		Plate 2B sample #52	Devonian Upper Sappington Fm. (180721FL1 - NAD83, -110.97726, 45.90480)		Plate 2B sample #9	Lower Silurian Shawangunk Fm. (NP-1; S)		Plate 2B sample #10	Upper Devonian Catskill "Redbed" (93SM003)		Plate 2B sample #11	Devonian Frog Mountain Ss. (AL-2-FM)		Plate 2B sample #12	SIlurian Eagle Rock + Devonian Chemung-Cloyd (S1, D1 combined)		Plate 2B sample #13	Lower-Middle Devonian Wokkpash Fm.		Plate 2B sample #14	Upper Devonian Sassenach Fm.		Plate 2B sample #15	Middle Devonian Oxyoke Cyn. Ss.		Plate 2B sample #16
Source	Frequency	Relative Frequency		Frequency	Relative Frequency		Frequency	Relative Frequency		Frequency	Relative Frequency		Frequency	Relative Frequency		Frequency	Relative Frequency		Frequency	Relative Frequency		Frequency	Relative Frequency		Frequency	Relative Frequency		Frequency	Relative Frequency		Frequency	Relative Frequency		Frequency	Relative Frequency		Frequency	Relative Frequency		Frequency	Relative Frequency		Frequency	Relative Frequency		Frequency	Relative Frequency		Frequency
1	0	0		0	0		0	0		0	0		12	0.133333		10	0.123457		14	0.166667		0	0		17	0.180851		0	0		17	0.377778		0	0		1	0.008		2	0.0060241		9	0.09375		2	0.00549451		0
2	1	0.0116279		0	0		0	0		0	0		2	0.0222222		6	0.0740741		2	0.0238095		0	0		1	0.0106383		0	0		0	0		2	0.00716846		1	0.008		0	0		4	0.0416667		0	0		0
3	53	0.616279		73	0.776596		62	0.673913		73	0.811111		42	0.466667		46	0.567901		52	0.619048		44	0.473118		39	0.414894		38	0.863636		28	0.622222		202	0.724014		90	0.72		2	0.0060241		31	0.322917		30	0.0824176		16
4	0	0		0	0		0	0		0	0		0	0		1	0.0123457		0	0		0	0		0	0		0	0		0	0		0	0		0	0		0	0		0	0		0	0		0
5	26	0.302326		18	0.191489		24	0.26087		14	0.155556		20	0.222222		13	0.160494		10	0.119048		21	0.225806		12	0.12766		5	0.113636		0	0		64	0.229391		29	0.232		0	0		11	0.114583		90	0.247253		110
6	1	0.0116279		1	0.0106383		2	0.0217391		2	0.0222222		8	0.0888889		1	0.0123457		6	0.0714286		3	0.0322581		14	0.148936		0	0		0	0		4	0.0143369		4	0.032		20	0.060241		24	0.25		220	0.604396		206
7	1	0.0116279		1	0.0106383		2	0.0217391		0	0		3	0.0333333		3	0.037037		0	0		3	0.0322581		2	0.0212766		1	0.0227273		0	0		1	0.00358423		0	0		210	0.63253		11	0.114583		14	0.0384615		32
8	4	0.0465116		1	0.0106383		2	0.0217391		1	0.0111111		3	0.0333333		1	0.0123457		0	0		22	0.236559		9	0.0957447		0	0		0	0		6	0.0215054		0	0		98	0.295181		6	0.0625		8	0.021978		14
sum	86			94			92			90			90			81			84			93			94			44			45			279			125			332			96			364			378
%grains not considered	7.52688			5.05051			5.15464			6.25			9.09091			17.3469			11.5789			2.10526			6			8.33333			0			1.76056			6.71642			18.2266			4			7.14286			4.54545
	U-Pb age	1s error		U-Pb age	1s error		U-Pb age	1s error		U-Pb age	1s error		U-Pb age	1s error		U-Pb age	1s error		U-Pb age	1s error		U-Pb age	1s error		U-Pb age	1s error		U-Pb age	1s error		U-Pb age	1s error		U-Pb age	1s error		U-Pb age	1s error		U-Pb age	1s error		U-Pb age	1s error		U-Pb age	1s error		U-Pb age
	553.181	5.56616		932.752	56.0927		967.144	68.4043		932.739	70.3315		385.31	10.1734		390.215	9.61744		407.775	6.00621		1003.58	23.2942		388.666	3.05448		1089	42		1038	45		518.19	14.6009		1142.4	6.7		2196.77	17.3964		1670.44	17.5301		1656.79	26.0061		1845.21
	938.485	87.2676		950.375	46.1763		1001.84	34.9292		952.345	34.175		391.037	5.72914		400.927	6.33604		419.031	4.05703		1024.86	29.9191		394.266	3.49502		1081	39		1078	14		582.784	13.7971		1417.8	8		2689.28	16.5415		1084.47	84.6727		1762.21	24.9785		515.132
	966.361	47.6103		978.749	45.1913		1004.28	22.9429		971.796	58.775		399.706	4.57329		434.715	9.24839		437.142	4.2265		1025.49	10.9883		396.955	4.03086		1104	46		431	8		697.42	7.41854		1020.2	3.6		2494.62	16.8723		1665.56	54.5778		1885.43	34.3297		1684.12
	974.889	49.9677		997.958	20.3169		1011.15	20.6802		979.191	29.3853		416.896	4.03701		442.087	10.5536		439.767	7.69436		1027.21	23.408		402.398	3.97906		957	50		1177	52		928.649	45.8427		966.3	8.8		1903.78	44.3197		1836.83	24.5678		1119.63	21.6865		1456.38
	1005.74	66.6887		998.301	73.0714		1025.15	20.238		979.924	29.1644		425.735	4.11981		446.663	4.44486		440.8	4.26067		1029.71	102.913		407.025	5.12464		979	23		1107	25		932.191	10.2535		1062.4	12.4		1893.14	32.4942		1639.08	60.8684		1793.23	28.6474		1671.97
	1022.58	20.2589		999.386	68.165		1030.81	21.4303		980.747	34.84		436.376	11.5188		449.243	6.16205		444.5	12.6709		1042.82	21.0273		407.553	3.69741		1160	51		1073	24		967.242	62.5251		1331.6	8.8		2059.5	17.6755		1935.46	80.7694		1192.48	19.923		1411.09
	1024.7	72.3048		1002.4	26.6679		1032.35	31.6165		982.243	72.6329		440.314	9.49117		450.687	5.87647		445.281	6.23863		1044.2	25.319		410.81	3.98175		1044	20		1170	15		969.066	33.6827		1136.3	9		2537.57	16.8389		2231.28	23.7435		1459.21	14.6255		1214.1
	1026.4	25.1197		1004.49	86.0932		1034.81	22.4327		988.802	25.2663		447.347	10.8477		454.761	4.61046		445.942	4.30868		1048.8	11.1447		422.693	4.51913		1245	72		1037	26		985.15	44.7891		1089.6	4.5		1994.14	17.9705		2780.21	33.9985		1706.67	40.4854		1620.98
	1027.06	65.3548		1013.92	52.8289		1039.42	38.4398		999.618	50.6482		452.046	4.36561		456.267	4.5371		447.433	9.16389		1051.74	22.6171		431.518	4.22804		1015	135		467	39		985.866	59.9521		941.8	10.8		1946.6	17.9321		1714.33	15.1009		1673.03	29.3239		1678.43
	1035.69	38.7939		1017	28.9704		1041.7	66.4129		1004.06	20.3391		455.6	8.62152		468.168	6.50264		458.912	7.75177		1052.97	73.2535		436.421	3.24687		1116	78		460	7		986.08	28.729		970	6.8		2038.22	17.6994		1787.03	16.4719		1587.94	29.4165		1391.17
	1050.83	20.1888		1024.54	20.2748		1059.58	35.632		1007.07	34.5142		462.598	7.23152		494.505	9.7107		460.421	4.44364		1057.78	29.6355		437.373	3.62323		1316	82		1018	98		987.665	30.1169		1176.3	5.8		1899.88	56.2487		1038.4	37.0775		1785.18	43.0379		1430.59
	1054.33	26.9563		1028.91	61.5672		1060.35	57.1733		1017.03	20.2671		468.074	5.41781		503.474	4.84315		466.263	9.13095		1067.21	82.1477		451.291	6.21091		1167	74		451	12		987.984	25.3792		1462.1	14.2		1933.42	17.9118		1498.46	39.9296		1518.18	41.9328		1449.25
	1062.08	27.5649		1036.03	30.4671		1061.47	34.6159		1017.44	23.511		491.031	5.15347		505.171	4.85885		469.284	9.18797		1067.25	31.681		453.718	4.33829		1034	100		466	12		988.114	25.2174		1068.4	13.3		1952.23	17.9168		2905.81	5.87848		1062.25	21.154		1680
	1064.08	74.7805		1036.82	52.1111		1069.67	31.5561		1018.98	33.2251		582.394	12.3623		531.201	5.09904		469.621	4.52923		1069.71	26.5741		458.366	4.27996		978	48		1002	20		991.236	29.3842		1181	16.7		2049.41	37.8028		1575.85	33.9747		1410.32	15.4539		1440.98
	1070.78	32.1667		1041.85	71.117		1072.84	33.9559		1023.45	20.2377		582.841	5.5727		547.886	6.04037		482.065	4.64482		1070.12	9.03421		466.352	4.79148		1054	121		1056	129		992.262	33.3261		1042.6	9.1		1919.88	18.0002		1414.38	66.8641		1399.38	32.5802		1697.82
	1075.31	20.0833		1043.47	22.8394		1074.34	48.6232		1024.78	20.4577		707.701	6.70238		550.964	5.28076		485.066	4.67266		1075.82	36.915		466.377	4.79623		914	51		441	10		995.943	27.0629		1164.5	3.2		2433.49	16.9629		1234	27		1707.08	31.345		2686.42
	1083.55	26.6838		1043.51	34.9192		1083.72	23.3409		1025.67	60.9997		953.71	91.343		576.93	11.5892		498.247	4.79479		1076.4	42.321		475.68	3.55797		1228	104		1050	26		997.041	69.7277		1370.1	15.5		3333.11	15.6581		1626.26	11.9328		1665.73	25.9823		1755.03
	1086.4	25.3553		1049.05	59.6882		1098.93	28.0153		1033.08	26.6953		985.957	46.6413		601.607	12.6365		553.426	6.04583		1076.7	13.8009		552.964	5.05745		1125	85		1003	58		997.271	25.1904		1086.3	3.3		1865.67	69.6687		1274.93	25.4863		1754.04	18.7351		1724.4
	1090.13	38.2895		1049.96	20.1916		1119.27	31.8384		1037.73	47.8738		995.423	38.6591		609.271	9.53439		645.784	6.51361		1076.94	12.733		975.863	25.9921		1016	92		459	9		1000.35	36.7526		1312.5	15.6		1954.84	21.6951		1094.09	18.0483		1726.48	29.8381		1401.71
	1093.33	39.9366		1050.21	26.667		1119.79	20.3614		1044.36	20.1837		996.194	39.0494		633.29	7.66035		793.249	7.46385		1080.72	19.0792		986.07	14.9248		1066	108		1028	36		1002.14	77.5505		1176.9	4.7		2379.69	19.9513		1214.48	23.4996		1475.41	19.1219		1428.87
	1107.64	49.7942		1057.3	55.715		1120.5	24.9336		1045.22	33.9032		999.755	53.4339		700.99	7.70497		903.145	89.5776		1083.56	51.2256		989.337	12.8609		884	119		447	12		1003.69	25.57		1446	9.7		2046.5	17.7234		1725	13.4337		1696.3	16.8537		1680.76
	1108.05	40.401		1059.04	21.9449		1127.74	55.7944		1046.47	32.6763		1010.42	68.3536		739.085	37.0098		914.954	23.6636		1083.89	56.3015		995.302	18.9219		1175	38		1140	52		1004.38	31.2519		1100	15		2566.59	17.2375		1961.72	7.21392		1688.02	20.643		1199.19
	1123.89	41.8738		1068.3	29.5749		1128.28	52.0416		1050.69	28.0299		1028.81	52.1856		774.148	7.29471		918.822	37.6469		1089.86	52.5973		997.456	17.6782		1221	125		1140	250		1006.59	66.7586		1168.2	4.4		2622.01	16.6483		1456.15	9.80713		1346.27	17.6174		1309.58
	1126.43	48.4409		1072.53	49.6318		1128.38	20.7202		1050.98	47.3759		1030.27	32.1569		829.683	63.8696		924.958	56.6986		1091.79	37.4466		1012.21	16.3748		1260	75		437	20		1007.13	43.816		1027.7	11.8		1821.07	21.1916		441.492	9.17477		1419.97	25.3619		1766.06
	1128.02	57.2744		1077.87	72.8885		1133.54	51.8088		1055.22	52.3969		1032.19	51.9808		906.566	20.6512		935.684	26.3317		1098.09	129.055		1013.25	13.2466		973	256		450	12		1009.83	22.9194		1604.5	19.5		1808.53	18.3164		446.045	4.75789		1749.1	18.3828		1744.03
	1130.15	34.1651		1079.48	52.9864		1138.58	29.6425		1060.46	31.5969		1034.7	46.1675		938.625	28.1514		951.475	28.4481		1104.39	58.5101		1021.83	11.4528		1084	70		1161	107		1010.16	27.6425		1151.8	12.6		2324.11	17.1637		1040.07	33.7775		1405.39	20.9616		1384.52
	1145.73	21.6974		1081.36	41.5828		1141.43	48.9935		1063.72	94.1945		1045.23	32.9341		991.466	37.8479		965.093	37.3778		1106.05	84.5739		1028.6	13.1157		1238	132		1061	40		1010.51	44.6942		1218.4	15.2		2724.48	16.4772		420.064	8.46235		2553.19	23.1905		1200.08
	1149.76	52.4332		1088.77	63.1384		1146.59	26.6388		1063.95	23.9554		1049.76	32.6852		994.027	20.339		1003.73	89.0077		1113.8	40.4238		1040.07	10.4273		1802	61		1123	19		1012.16	24.4839		1400.9	5.6		1950.34	17.9173		1719.15	9.54105		1415.1	14.4843		1663.87
	1152.56	23.246		1089.87	40.1449		1148.69	20.4872		1064.38	84.1697		1058.33	28.6076		1000.06	38.428		1003.88	79.3348		1139.47	36.6676		1043.8	17.172		945	179		419	10		1012.94	19.8205		1445	9.8		2618.14	16.6546		2026.78	12.445		1631.08	20.4636		1465.56
	1154.54	49.8183		1092.36	21.4446		1149.53	27.2441		1071.58	86.482		1064.49	66.3951		1006.75	39.7799		1007.54	56.436		1150.49	37.94		1043.98	14.6557		1196	34		450	8		1014.07	37.3416		1023.1	10.9		1899.54	17.9932		1088.39	15.9833		1697.53	34.6244		1728.69
	1166.04	19.8118		1098.44	65.7324		1150.88	19.8752		1072.42	25.5356		1070.28	96.4124		1017.66	32.8242		1011.94	31.6328		1162.6	14.6611		1049.96	19.8176		1161	32		1099	191		1014.74	37.7991		1433	5.7		2282.08	17.2264		1683.02	16.1612		1644.49	18.2888		1674.26
	1174.12	36.4204		1103.79	29.7925		1152.59	38.3145		1074.39	30.9637		1071.08	47.7518		1022.74	53.8789		1012.63	34.8951		1164.88	38.9985		1051.96	12.5735		1182	51		1064	23		1015.1	23.7159		1246.2	7.3		2353.78	30.632		1267.69	9.65611		1558.46	52.3307		1925.56
	1174.98	20.2308		1119.39	44.1378		1154	25.6168		1080.28	34.9362		1072.94	33.9539		1026.77	49.8065		1013.33	42.3845		1182.53	11.3732		1052.28	9.74297		1091	34		442	9		1015.45	24.1306		1132	6.7		1830.25	43.4722		1736.32	8.24777		1691.48	24.1019		1656.77
	1175.53	30.9048		1120.55	45.0907		1154.66	56.8553		1081.36	43.9524		1111.26	21.6249		1027.97	20.2295		1016.52	35.3018		1188.09	23.9381		1059.06	13.4517		1051	52		1039	49		1015.5	30.3674		1081.6	5.7		1961.02	45.9078		1753.18	7.02314		1683.36	26.5193		1929.48
	1175.89	25.7198		1122.76	19.9395		1156.96	60.3304		1088.43	44.4941		1139.17	28.4724		1029.8	20.4347		1018.88	36.46		1188.84	20.6007		1059.08	10.6203		1047	30		1090	50		1015.93	72.4121		1135.5	9.8		1950.95	34.4351		1634.2	17.801		1649.2	18.7714		1325.85
	1179.92	29.4743		1125.43	31.5164		1163.44	19.8369		1091.94	33.4529		1142.25	111.927		1031.02	43.5097		1024.48	66.2036		1191.55	26.583		1062.29	11.203		1014	31		1028	83		1016.76	33.5102		1060.2	14.3		1870.45	33.0745		1136.07	22.1112		1502.52	32.5687		1654.25
	1189.45	74.6812		1127.66	57.7327		1165.44	31.5074		1092.79	46.07		1143.67	45.7373		1036.32	67.666		1028.53	45.7076		1195.5	163.824		1064.98	18.2515		1305	38		1258	70		1017.6	18.2679		1161	8.8		1912.22	32.9037		1688.2	9.4466		1834.1	47.5696		1626.27
	1194.84	29.7947		1132.31	37.2864		1165.63	28.3747		1094.7	70.0323		1145	32.4063		1037.38	28.6812		1029.65	22.8499		1218.69	23.9958		1073.05	11.3882		1036	30		433	9		1019.44	27.0948		1314.7	5.9		1958.19	18.6137		1999.79	31.6766		1711.12	34.115		1741.07
	1195.91	20.9642		1133.75	31.6587		1166.52	22.0014		1095.1	48.4558		1150.32	20.6622		1044.78	27.4032		1034.68	40.2097		1232.21	105.199		1073.06	15.715		965	30		429	13		1020.77	22.9572		1298.5	15.6		2547.86	19.6167		1196.85	31.124		1720.96	34.4372		1698.53
	1197.9	22.4864		1140.31	89.9615		1166.84	20.9978		1099.38	68.6598		1154.29	33.9427		1048.81	62.7713		1036.81	63.0889		1237.43	83.1672		1075.99	12.1067		1025	38		451	9		1021.35	17.6175		1107.7	8.8		2071.44	34.5263		1890.12	7.79156		1687.57	15.59		1818.8
	1198.6	19.7184		1151.29	19.8555		1172.5	35.0459		1110.91	62.3318		1168.09	63.9938		1058.05	47.94		1037.99	55.1446		1238.99	11.6134		1082.95	11.1719		1120	34		1101	81		1021.78	58.2368		1242.4	17.8		2534.09	16.7998		1649.23	31.7169		1610.68	42.0447		1685.3
	1199.09	19.7169		1155.34	55.6602		1175.1	36.0254		1113.07	26.5877		1168.43	55.0742		1058.46	55.9718		1048.12	76.849		1253.36	36.5681		1085.6	21.2059		1456	40		1134	55		1022.09	63.1275		1338.8	9.5		2606.13	19.5416		1634.5	17.0076		1697.83	48.2133		1426.37
	1201.91	27.8077		1155.68	25.269		1185.55	57.7715		1123.74	62.6758		1176.26	45.124		1069.12	28.7466		1050.75	54.4855		1267.71	25.1872		1123.9	12.3981		865	47		1226	138		1022.32	26.7047		1265.3	23		1100.9	34.2775		1406.15	67.8837		1764	42.9025		1796.62
	1202.74	19.7088		1161.92	38.2641		1190.66	27.0885		1125.39	56.0507		1178.19	56.9984		1074.15	20.0866		1051.68	52.6248		1279.14	68.787		1129.15	12.6018		971	28		1231	162		1022.34	35.7175		1357.9	9.5		1809.79	23.1214		540.095	13.9212		2341.7	35.1475		1723.71
	1206.15	19.7105		1162.41	36.6791		1193.53	35.9436		1128.01	39.0618		1178.66	96.6034		1090.39	59.9736		1053.32	39.3175		1301.06	40.2588		1138.94	19.1577		1047	32		433	12		1022.91	58.9873		1031.4	4.4		1951.02	17.871		1448.85	110.388		1757.56	27.0749		1684.42
	1208.22	43.5466		1163.69	50.5505		1194.14	19.7549		1130.85	21.326		1179.32	82.2944		1105.72	90.0011		1054.94	33.2577		1301.47	95.6229		1146.04	14.5654		1031	34					1023.01	24.1389		1006.6	8.7		1941.23	30.4613		1237.6	19.9995		1738.2	24.5297		1735.05
	1209.36	118.642		1165.14	32.3018		1200.55	25.4442		1135.42	21.0978		1193.54	39.2804		1116.07	64.3322		1056.26	44.5273		1316.96	16.9706		1147.09	16.5162		1491	40					1023.57	22.7712		1156.7	11.8		1967.22	20.1678		1062.12	34.6018		1552.93	29.947		1751.62
	1212.29	41.1381		1165.19	19.8169		1206.48	20.6902		1136.19	36.8326		1197	68.7225		1117.87	94.1969		1057.24	52.5639		1317.49	34.4425		1157.89	16.85		1445	42					1026.23	65.9129		1322.9	12.2		2802.47	16.5388		1034.69	64.7036		1065.18	29.1605		1427.35
	1230.9	35.3967		1166	19.8148		1206.78	61.6705		1139.32	19.8909		1198.12	84.449		1122.07	33.3147		1068.79	31.1549		1337.97	28.7063		1159.11	11.649								1026.79	18.4469		1103.2	14.9		2621.69	16.6478		1042.8	47.4761		1694.41	15.4962		1844.33
	1239.01	22.9621		1167.58	19.8062		1209.2	73.1901		1139.72	66.4624		1217.16	29.503		1125.17	30.4965		1076.34	99.2256		1338.1	24.732		1165.2	14.5641								1026.92	70.1111		1085.4	10.1		2600.78	16.6693		1109.71	69.6279		1703.95	30.2466		1423.61
	1243.8	46.2838		1170.8	31.7056		1213.07	50.7798		1144.91	28.0321		1221.05	58.2088		1128.4	39.7094		1077.52	95.399		1355.66	31.5922		1168.64	16.3862								1027.01	20.707		1154.6	5.2		2677.14	16.5972		432.014	13.4331		1636.99	17.9264		1761.82
	1248.95	36.6182		1171.91	47.1326		1215.05	29.4263		1146.09	63.9993		1245.1	22.3371		1133.09	35.5278		1083.11	32.0925		1355.93	37.733		1178.7	11.6884								1027.02	25.7547		1309.4	6.5		1881.04	18.0219		1773.82	17.3436		1837.11	23.6583		1786.15
	1260.02	33.4258		1173.18	46.1249		1231.37	19.6254		1146.85	41.4613		1246.27	32.5123		1141.72	62.1399		1086.13	60.7679		1362.66	17.5261		1198.47	18.3177								1027.57	46.1826		1074.1	8.8		3314.67	15.6834		441.316	6.37214		1485.87	25.4796		1066.24
	1269.23	43.9362		1173.78	21.7904		1239.71	115.943		1152.27	39.1217		1249.63	58.1913		1155.1	30.5621		1093.17	37.6589		1371.1	33.4235		1228.63	10.4661								1027.92	36.1584		1259.6	10.6		2683.83	16.5699		2844.44	4.26913		1506.15	22.6991		1698.08
	1279.78	123.771		1174.35	33.8441		1245.67	67.2163		1158.48	30.5483		1267.4	74.0248		1159.3	23.7228		1096.07	50.4205		1377.19	39.8026		1255.76	9.35407								1028.02	34.9141		1015.3	6.5		1861.39	18.1338		1434.41	10.6689		1698.17	28.9626		1603.54
	1304.58	21.7549		1181.29	38.7516		1251.15	19.5945		1158.88	22.8122		1281.78	72.9304		1164.79	19.8182		1097.15	53.2513		1402.02	21.8223		1291.85	17.2949								1028.16	29.5583		461.5	2		1920.91	18.005		1412.48	54.6252		1652.6	30.6134		1665.18
	1314.28	23.8605		1181.36	30.2866		1253.17	23.4612		1160.95	35.8967		1288.7	47.3071		1174.42	31.2663		1132.4	32.4559		1411.29	33.8305		1295.15	19.0104								1028.37	23.1931		1479	10.5		2374.46	22.3447		1841.29	11.0784		1470.64	17.3574		1729.66
	1324.18	34.8755		1183.12	46.4706		1268.39	19.5276		1165.34	27.0552		1298.02	74.9004		1179.03	45.3409		1133.6	44.8568		1423.88	38.4809		1311.98	10.4869								1028.5	29.8389		961.7	8.6		1906.64	17.9737		1061.56	23.9235		1745.95	17.8951		1737.76
	1337.82	39.503		1183.82	19.766		1274.84	33.084		1165.58	41.864		1337.43	19.7176		1181.05	31.8529		1155.37	60.5474		1434.1	19.6073		1318.84	14.0563								1029.9	22.4623		1183.2	6		1922.94	18.0838		1730.57	19.5982		1717.63	15.0784		1665.52
	1340.73	21.8489		1187.49	24.2941		1276.58	28.8616		1168.49	23.3904		1341.77	35.7494		1181.87	33.813		1159.7	40.8556		1435.85	72.139		1324.82	15.0928								1030.07	26.4009		1277	8.7		2985.09	16.0968		440.941	6.1052		1640.65	22.8866		1613.56
	1350.23	25.4913		1192.98	52.3515		1288.86	19.4786		1174.82	29.8796		1347.36	69.9256		1186.57	51.1916		1172.56	66.8332		1452.28	8.70826		1348.73	14.4545								1030.32	15.7783		1252.1	4.9		1808.15	18.2508		1434.17	79.6923		1629.84	14.4012		1665.54
	1370.38	75.154		1194.52	39.6625		1296.41	81.3524		1176.63	19.7848		1347.41	30.5038		1200.6	33.6036		1178.29	62.7181		1454.03	23.5813		1387.25	44.7476								1030.59	15.8596		1401.3	7.5		2037.79	19.0867		1032.95	17.0965		1624.64	26.1369		1075.17
	1381.4	25.7642		1198.38	27.4152		1302.34	41.782		1177.95	59.1998		1354.77	64.2924		1217.34	38.5553		1183.16	19.7713		1459.73	14.3112		1422.11	12.2892								1032.62	52.8256		1144.4	17.2		1971.04	17.882		442.192	17.3461		1606.55	23.4631		1821.82
	1384.62	23.8218		1201.82	25.4382		1306.56	19.4522		1186.2	25.2891		1375.6	21.7442		1217.54	27.1428		1183.62	40.3153		1486.82	10.9665		1436.08	13.1726								1032.79	40.1393		1077	14.8		1839.63	18.2289		1226.4	11.3296		1431.59	15.2769		1457.65
	1406.79	25.1636		1204.23	38.4439		1309.67	31.5928		1194.2	19.7366		1375.9	52.709		1218.76	38.4119		1189.99	47.3907		1495.92	20.4577		1448.95	12.6318								1033.83	25.8904		944.4	3		2613.59	16.651		1849.15	17.3823		1490.18	40.181		1715.09
	1414.62	24.492		1212.98	59.6769		1317.58	35.3212		1201.12	51.8605		1377.38	27.691		1225.84	19.6424		1197.99	33.3307		1512.62	9.96798		1468.92	10.8484								1033.84	65.9424		1336.6	6.7		2120.07	17.5274		1701.64	33.115		1434.75	32.6723		1483.94
	1422.56	19.123		1213.02	19.687		1330.59	19.4142		1204.98	19.7107		1390.69	45.4976		1228.11	122.65		1204.41	29.3602		1569.86	11.8172		1472.8	71.5706								1034.2	31.4886		1453.8	6.8		2376.96	17.131		1177.19	181.846		1515.28	38.4858		1714.69
	1424.43	34.4257		1220.48	76.739		1367.74	100.79		1206.56	56.7794		1401.77	33.344		1237.71	30.2793		1205.41	27.5987		1636.59	7.95034		1486.66	17.8451								1034.71	27.6621		1576.5	19.6		1937.02	17.9008		1712.66	12.3354		1431.76	33.7671		1725.54
	1437.46	41.4137		1226.23	21.6368		1424.66	24.3111		1212.15	29.1456		1422.25	42.4321		1244.8	20.6355		1206.29	50.4905		1692.7	12.1296		1496.78	14.0522								1036.32	18.9715		997.8	12.3		1778.07	18.2772		1882.54	5.88591		1230.38	16.4654		2071.23
	1440.14	30.1165		1234.49	29.2339		1440.16	35.4692		1227.63	84.8805		1428.57	75.0608		1249.54	26.8276		1212.11	57.0821		1728.39	5.70859		1514.9	13.0807								1037.03	37.3426		1019.2	9.4		1648.53	18.6255		1120.07	38.1511		1707	30.8938		1765.81
	1447.15	20.9594		1237.06	19.6166		1441.8	22.3081		1234.96	24.5218		1442.75	38.3047		1271.48	38.0505		1214.43	19.6799		1806.95	43.1671		1532.4	12.8169								1037.72	68.9869		2178	10.1		1851.61	18.5325		1155.44	13.1338		1707.53	37.2027		1756.14
	1461.06	21.4804		1255.55	27.6123		1442.53	19.0531		1248.39	26.629		1467.88	31.5696		1281.46	23.8463		1215.15	29.1167		1831.57	5.26139		1545.7	13.1399								1039.06	31.1297		1499.6	7.5		1875.81	22.3906		1434.9	9.26346		527.312	11.0378		1609.67
	1471.6	31.3182		1285.93	21.616		1443.82	39.2504		1293.76	45.5213		1479.35	63.3453		1300.43	46.6534		1225.61	44.8037		1920.07	3.92045		1566.58	11.4372								1039.25	40.9797		1340.7	12.6		1920.53	17.9679		1647.96	12.7993		1760.19	29.7288		1784.53
	1475.04	32.8236		1286.89	63.495		1449.83	21.7152		1295.94	42.9807		1479.63	33.1841		1324.36	37.2109		1252.39	32.0932		2573.81	6.74246		1597.17	10.57								1039.65	50.4946		1361.6	29.2		2683.55	22.844		546.666	7.13963		1455.29	19.0197		1336.48
	1475.55	29.9736		1300.83	28.7654		1455.08	19.224		1315.58	19.3964		1479.85	46.2674		1333.4	19.3575		1274.26	82.9328		2616.3	13.4666		1599.23	11.9452								1039.74	35.0836		1018.9	6.3		1904.1	17.9834		1226.58	9.11972		1398.18	28.6585		1667.06
	1482.72	23.6897		1324.36	45.7298		1459.2	22.2611		1335.67	36.9547		1489.96	24.4274		1338.42	22.2483		1276.94	32.5627		2630.09	6.17633		1624.85	9.78333								1039.9	48.5787		1039.6	6.3		2300.59	17.1907		2827.17	5.84301		1420.46	37.226		1394.74
	1482.88	18.9563		1333.82	26.5196		1460.52	23.9608		1337.94	51.2643		1493.61	55.6483		1369.03	35.8118		1283.23	55.7537		2638.81	10.7363		1630.05	11.0688								1040.03	36.4527		1618.3	17.2		1919.89	17.9496		1763.87	44.1639		1734.95	29.8136		1446.47
	1486.21	23.7128		1334.5	87.6584		1462.99	22.045		1410.19	61.2631		1496.82	55.3015		1369.52	19.2647		1309.28	53.4482		2642.97	5.46386		1649.06	12.5425								1040.46	45.518		1103.2	7.4		1947.65	28.5439		1734.05	13.2445		1750.15	38.4709		1772.13
	1492.63	28.2053		1340.68	79.4542		1464.23	21.0943		1416.1	43.2571		1500.9	57.1056		1373.44	19.2417		1331.19	31.7487		2655.58	2.87635		1651.03	12.8152								1041.23	56.835		1006	7		2689.7	16.5988		2672.4	14.0287		1708.75	33.4732		1394.41
	1497.3	46.2736		1347.02	29.1822		1465.81	19.0071		1422.9	35.5489		1502.34	57.476		1457.11	22.0734		1339.34	24.9348		2683.84	6.33962		1667.61	12.7058								1042.03	36.2736		1428.2	21.5		2305.57	22.2029		1819.31	8.32149		1800.39	19.6355		1877.96
	1499.15	48.8514		1351.74	19.2963		1466.22	23.1915		1428.76	27.6849		1506.96	44.7788		1458.65	39.2259		1341.6	37.2999		2685.73	13.849		1695.97	11.7236								1042.96	60.8497		1291.8	10.8		1852.31	18.2853		1976	9.69204		1724.06	24.0531		1828.09
	1502.57	18.9011		1354.59	48.6451		1467.27	22.6009		1440.18	19.0653		1543.44	18.8003		1475.46	18.9714		1349.83	19.3059		2691.41	9.45964		1703.51	13.4178								1043.08	19.1878		1408	8.5		1836.64	31.0744		1875.23	9.98384		1785.9	36.3453		1438.44
	1521.08	21.8745		1357.25	54.1915		1471.58	34.1682		1440.48	23.263		1574.24	36.7032		1475.78	26.0131		1361.72	80.1825		2693.15	5.35743		1704.08	9.38339								1045.25	17.4385		1191.3	34		1923.29	17.9594		1191.41	22.0551		1393.09	16.4124		1683.61
	1536.9	43.7818		1376.28	23.0793		1476.73	34.4084		1446.66	19.0441		1612.49	24.7928		1475.9	30.3551		1428.26	43.7624		2695.34	7.72692		1718.75	11.9206								1046.71	37.0793		1246.6	22.3		444.942	5.54615		999.576	12.5253		1572.25	22.3233		1718.58
	1554.16	50.9032		1429.5	34.2535		1487.79	54.1768		1454.32	39.0076		1620.71	39.4657		1478.68	18.9604		1440.15	26.3299		2701.89	1.88574		1726.97	9.90583								1046.77	31.2702		1040.2	21.2		1995.12	17.7955		548.084	10.6602		1458.73	38.5115		1619.45
	1563.35	30.565		1450.71	22.4661		1499.15	53.9035		1471.89	18.982		1643.91	39.3389		1508.52	110.548		1477.72	128.341		2704.57	5.79717		1749.63	13.916								1046.83	11.8856		1391.7	5.3		1840.36	18.12		656.523	7.7869		1722.81	35.0743		1683.77
	1667.11	18.5		1455.57	25.3046		1506.32	30.2364		1474.01	40.6136		1648.88	30.6011		1520.33	26.5904		1485.97	33.9098		2712.67	7.59386		1779.05	9.60483								1047.02	28.4761		986	8.1		1922.13	17.944		987.342	18.4864		1514.84	29.8356		1723.2
	1825.32	24.4876		1473.66	49.5417		1508.53	18.8867		1476.32	23.3454		1652.16	64.9782		1521.94	18.8538		1501.06	48.2217		2712.84	2.44773		1780.75	11.6302								1047.22	32.7308		1050.2	6.6		1854.99	18.0816		1119.69	19.0412		1708.5	39.7727		1710.98
	2436.93	29.8178		1477.33	43.6254		1511.09	18.8908		1500.16	31.7737		1697.85	31.1468		1528.29	18.8394		1548.9	25.173		2713.44	7.70663		1798.39	11.6453								1049.86	16.5026		1046.9	8.4		2716.66	16.5233		1332.3	15.1735		1748	20.9755		1782.59
	2570.91	49.1554		1478.8	52.7654		1519.04	33.9685		1505.85	18.9069		1744.08	39.9514		1538.57	45.3433		1623.68	50.6182		2713.68	9.5965		1844.51	9.55451								1049.93	27.2881		1151.5	4.7		3159.96	15.8807		1161.72	39.78		1406.47	27.547		1458.22
	2693.76	28.9129		1484.7	29.7487		1545.07	53.9906		1516.82	43.7655		1774.9	18.269		1554.9	27.0377		1630.55	54.8503		2719.03	16.2667		1852.85	9.4804								1051.6	40.6025		1655.9	9.2		2633.9	16.618		440.014	8.60439		1288.35	11.6778		1457.77
	2714.83	39.2514		1490.94	23.2881		1685.53	26.0288		1531.84	18.8529		1828.79	30.8271		1597.2	25.3053		1640.21	28.4045		2730.78	5.53626		2631.61	9.97131								1053.47	38.0361		1240.9	21.8		2211.1	17.379		425.479	11.7125		1544.47	26.5065		1734.34
	2757.05	16.4268		1501.61	39.5163		1703.2	39.4167		1556.52	31.3561		1897.03	28.9525		1683.29	23.0799		1647.68	34.3142		2739.89	7.4617		2634.28	17.9131								1053.69	38.8424		896.2	13		1972.55	17.8374		1215.76	16.5023		1731.71	17.3123		1410.4
				1503.49	18.9097		1824.68	18.1397		1624.39	21.0227		1954.24	36.797		1860.02	25.6487		1648.7	61.0223		2742.22	7.75638		2674.56	11.6582								1053.75	17.9008		1090.4	5.8		1847.55	18.1533		2067.38	8.37876		1417.02	24.2971		1748.51
				1513.34	52.6734		1953.32	32.5116		1649.44	24.6708		2101.41	36.1782		1905.24	31.6241		1675.57	81.5337		2759.17	38.6191		2689.13	8.28767								1053.85	31.8845		1391.2	7.9		1863.71	18.056		1168.27	66.7278		1688.06	25.3959		1747.95
				1527.44	41.6429		2683.25	57.7335		2734.59	16.4632		2112.66	29.6463		1930.37	27.222								2701.17	11.602								1056.32	29.7222		1168.9	5.2		1913.65	17.9762		1435.07	31.368		1723.71	36.754		1662.39
				1636.26	31.9462		2724.39	16.4723					2627.87	48.8848		2023.41	17.7193								2709.22	9.99521								1057.89	26.684		1024	5.2		2045.82	17.7945		1028.23	27.2635		1649.85	32.8978		1734.18
				1887.78	48.0716								2696.26	18.9922		2749.81	16.4411								2811.78	9.71682								1058.65	29.4364		1210	9		2089.49	17.5928		2673.55	10.734		1678.89	34.735		1755.3
				2660.84	27.3456								2773.45	18.3656											2814.77	10.9149								1061.77	31.89		1026.2	7.4		1968.36	17.8768		1725.1	15.3686		1684.06	38.9785		1841.14
																									3502.58	9.48421								1062.98	30.9394		960.3	10		1912.12	17.9866		1716.63	18.4653		1754.6	45.1615		2589.04
																																		1064.85	90.2235		1409.4	7.1		1969.5	5.74997					1773.36	4.26378		1457.44
																																		1065.21	33.7789		1142.8	8.4		1854.25	11.2653					1433.59	26.0728		1680.71
																																		1065.26	55.2305		1158.3	9.4		1936.22	5.50563					1471.52	11.2987		1659.72
																																		1067.23	14.913		1748.8	27.7		2555.72	6.57216					1784.42	13.9224		1704.88
																																		1068.92	61.0032		1359.3	9.1		1782.28	15.2377					1688.93	22.6931		1421.59
																																		1069.06	46.4135		893.4	13		1933.5	10.8401					1753.48	6.3382		1432.79
																																		1069.1	42.0402		1109.7	6.5		1927.39	13.7392					1451.96	26.6551		1662.81
																																		1069.77	32.7491		992.4	9.7		1925.39	8.67226					1657.21	18.1091		1645.71
																																		1073.33	33.0095		998.5	4.9		2825.22	5.10124					1243.63	10.4364		1666.34
																																		1076.25	22.4709		1033.4	10.3		2565.51	9.75339					2734.37	2.80861		1769.47
																																		1077.35	17.5647		952.7	23.4		1836.58	12.9995					1774.39	12.2147		1447.89
																																		1078.5	26.7295		1115	16.2		1662.01	24.8771					1701	34.6774		1916.4
																																		1078.92	28.6976		1175.7	4.4		1859.76	18.895					1707.84	11.5614		1688.22
																																		1079.19	17.3532		1418.1	23.5		1815.9	18.3293					1707.57	6.28035		1463.26
																																		1079.33	23.0953		1059.7	10.5		2580.76	8.73313					502.068	4.20651		1448.42
																																		1079.57	24.7556		1108.5	5.1		1946.35	57.0896					1304.14	14.3803		1705.01
																																		1080.27	28.8487		1157.6	9.3		1828.95	43.2349					1461.86	9.23776		1439.71
																																		1082.28	62.0728		1197	7.3		1930.36	13.2729					1453.98	11.8525		1671
																																		1084.03	25.7357		1094.2	7		2104.04	35.1771					1697.54	16.1785		1741.6
																																		1086.13	30.9724		525.7	1.1		1809.06	33.1751					500.833	7.012		1743.52
																																		1086.92	22.3893		1145.1	8.3		2579.31	27.3765					1687.64	41.3677		1677.91
																																		1087.25	44.4275		594.9	5.1		1704.18	12.7935					1702.19	18.4818		1463.98
																																		1090.45	47.6628		933.7	6.9		2066.62	50.8391					1789.32	32.6209		1669.69
																																		1090.57	37.5436		1504.4	4.8		1837.67	35.32					1691	12.6018		1221.5
																																		1091.46	24.6644		1466	7.4		3361.01	3.37723					1430.69	31.425		1674.38
																																		1094.3	26.5436		1023.9	8.5		2323.58	13.2365					1699.78	27.7045		1383.92
																																		1097.23	34.7984		1019.9	6.2		1952.85	20.0474					1691.75	22.0723		493.193
																																		1097.32	34.6308		1050	3.5		1848.5	48.1357					1757.69	9.29492		1696.91
																																		1100.27	26.1544		952.1	11.3		1830.71	14.9862					1716.29	42.8245		1450.3
																																		1100.71	33.3311		1035.8	6.2		2776.51	4.17766					1672.09	12.4922		1727.27
																																		1102.12	18.5505		1016.8	8.6		1951.75	7.95202					1737.17	19.5246		1133.24
																																		1108.35	30.9666		1259.7	7.2		1918.46	10.4617					1872.79	40.6306		1455.26
																																		1108.9	38.771		1032.9	5.5		2849.32	13.1645					1440.96	10.4273		1693.61
																																		1112.33	98.3968		993.2	2.8		1789.07	8.03668					1699.48	23.0295		1404.38
																																		1112.4	25.2649					2208.89	12.8568					1186.68	90.6365		1461.33
																																		1112.88	25.7755					2531.72	16.669					1722.82	29.1962		1659.35
																																		1115.16	43.1495					1661.33	17.0363					1275.17	125.43		1440.32
																																		1119.42	37.7626					2702.36	7.10373					1470.02	29.7724		1435.93
																																		1120.88	39.2387					2318.34	18.5498					1102.48	38.5971		2144.21
																																		1121.16	40.8766					2362.79	9.40061					1416.43	43.0998		1413.91
																																		1123.28	37.8448					1926.24	11.2829					1694.31	21.5236		2763.8
																																		1126.52	14.1141					1931.7	23.7432					1409.84	44.6341		1810.01
																																		1128.96	36.9825					1916.87	12.001					1447.94	12.8704		1658.77
																																		1129.8	24.8037					2760.91	35.2254					1723.11	6.5722		1831.68
																																		1131.43	30.5425					1983.77	4.58691					1453.81	40.1903		1452.08
																																		1135.27	25.0146					2698.69	6.82402					1687.45	9.77193		1648.81
																																		1136.34	34.957					1920.1	15.7574					1436.33	17.7371		1415.48
																																		1140.07	24.7423					1843.81	8.00104					1440.9	12.0147		1733.12
																																		1141.32	55.5442					2748.15	9.26577					1717.47	16.1142		2630.28
																																		1141.63	20.0859					2033.22	5.49194					1442.55	10.6079		1789.32
																																		1143.9	25.8883					1971.38	6.52228					1648.82	13.9215		1759.24
																																		1144.14	47.0713					1643.09	18.0289					1727.03	5.27303		1893.17
																																		1145.37	29.6214					1957.89	7.17268					1447.44	15.4832		1458.9
																																		1149.49	50.96					2806.85	16.2752					1722.42	26.7382		1689.99
																																		1152.01	27.6396					2703.48	5.52367					1095.85	34.5504		1717.29
																																		1152.46	15.8178					1859.55	11.844					1423.74	57.4608		1656.98
																																		1155.62	40.6579					1735.95	72.294					2567.79	6.17291		1741.13
																																		1161.6	33.5757					2564.34	3.73231					1796.17	20.2547		2745.42
																																		1161.99	28.512					1925.41	18.855					1461.03	8.42744		2123.89
																																		1162.16	47.7863					1847.53	59.5675					1691.57	24.0886		1473.69
																																		1165.71	9.8241					1832.19	41.3643					1740.07	8.9359		1459.13
																																		1166.39	40.0184					1868.82	6.51532					1694.92	18.3422		1717.57
																																		1166.79	18.7753					2672.81	15.8744					1700.39	90.2298		1795.49
																																		1169.8	21.3139					1904.25	9.34888					1175.18	19.8129		1738.73
																																		1171.11	17.7594					1913.14	10.9315					1710.87	5.68226		1967.12
																																		1175.32	35.5524					2278.87	64.3532					1441.12	8.9229		1686.51
																																		1177.22	69.3918					2925.98	25.6616					1451.82	28.2833		1710.38
																																		1183.46	23.2635					1984.18	30.0502					1728.12	36.087		1860.36
																																		1185.74	22.1718					1910.47	11.5225					1751.79	11.3295		1450.59
																																		1186.54	33.4517					1829.79	8.38485					1695.08	9.49048		1678.13
																																		1187.21	29.455					1870.65	12.3658					1759.14	5.54674		2679.78
																																		1191.66	29.3934					2150.87	6.85949					1328.68	11.111		1135.06
																																		1191.84	25.4222					1851.02	31.3201					1085.88	72.1051		2057.8
																																		1192.6	27.1888					1981.16	77.3211					1728.05	11.843		2132.41
																																		1194.06	43.5096					2724.27	6.39985					1712.89	21.6096		1457.26
																																		1194.34	69.2863					2044.94	5.48644					1783.91	11.806		1710.62
																																		1202.78	34.57					2389.04	11.431					1649.58	15.9948		1706.1
																																		1203.02	69.3588					2800.44	50.9574					1448.55	19.8867		1422.72
																																		1204.34	35.7587					2113.86	53.55					1742.72	27.6067		1432.22
																																		1205.98	49.2034					1965.95	35.0595					1606.95	16.9512		1433.59
																																		1206	29.5936					1907.15	23.6369					1702.84	25.0303		1705.87
																																		1209.33	85.6716					1680.56	17.5076					1467.56	23.5076		1409.62
																																		1211.28	43.9434					2347.39	14.1776					1715.22	8.57025		1911.44
																																		1213.32	25.0389					1844.01	11.4501					1676.86	15.4289		1717.76
																																		1214.29	38.1921					1842.23	11.6661					3466.56	4.54527		1718.63
																																		1216.56	69.7285					2068.09	31.017					1954.84	25.9098		1695.24
																																		1220.33	36.2799					1914.87	12.93					1667.7	13.7878		2092.79
																																		1220.64	30.1992					1933.85	12.3955					1705.55	17.4708		1704.97
																																		1227.03	40.034					2609.97	6.33495					303.144	13.5295		1701.52
																																		1229.41	42.263					1832.26	41.8799					1715.3	27.5438		1439.85
																																		1236	30.2551					2328.13	36.9758					1620.06	99.9433		1715
																																		1237.13	69.8823					2631.62	28.6524					1254.69	56.5669		1687.61
																																		1240.56	21.665					1931.48	13.7039					1806.68	8.37209		2876.63
																																		1241.48	16.2721					1918.83	26.8587					1236.24	19.731		2086.21
																																		1243.28	69.7131					2559.23	28.1881					1798.06	8.57581		1724.47
																																		1248.55	21.6249					1930.11	10.0745					1646.4	13.501		1363.22
																																		1251.91	38.3215					2812.23	50.5565					303.144	13.5295		1770.44
																																		1253.73	22.1716					2083.22	7.25724					500.833	7.012		1429.22
																																		1257.45	36.7972					1972.73	14.8209					502.068	4.20651		493.193
																																		1261.96	25.8087					1922.48	10.7639					527.312	11.0378		515.132
																																		1262.44	33.4815					2572.95	6.27299					1062.25	21.154		1066.24
																																		1274.56	28.2447					2703.72	3.22625					1065.18	29.1605		1075.17
																																		1278.67	36.0935					1820.85	10.8582					1085.88	72.1051		1133.24
																																		1285.73	43.6734					444.942	5.54615					1095.85	34.5504		1135.06
																																		1292.03	27.5268					1100.9	34.2775					1102.48	38.5971		1199.19
																																		1293.45	44.1624					1643.09	18.0289					1119.63	21.6865		1200.08
																																		1294.66	4.78986					1648.53	18.6255					1175.18	19.8129		1214.1
																																		1300.83	23.5677					1661.33	17.0363					1186.68	90.6365		1221.5
																																		1303.97	26.9642					1662.01	24.8771					1192.48	19.923		1309.58
																																		1307	32.46					1680.56	17.5076					1230.38	16.4654		1325.85
																																		1308.19	26.5418					1704.18	12.7935					1236.24	19.731		1336.48
																																		1309.29	22.8483					1735.95	72.294					1243.63	10.4364		1363.22
																																		1312.91	47.5906					1778.07	18.2772					1254.69	56.5669		1383.92
																																		1315.62	20.8184					1782.28	15.2377					1275.17	125.43		1384.52
																																		1319.86	29.2447					1789.07	8.03668					1288.35	11.6778		1391.17
																																		1323.59	25.7497					1808.15	18.2508					1304.14	14.3803		1394.41
																																		1324.38	30.0887					1808.53	18.3164					1328.68	11.111		1394.74
																																		1328.87	22.7098					1809.06	33.1751					1346.27	17.6174		1401.71
																																		1332.8	50.2347					1809.79	23.1214					1393.09	16.4124		1404.38
																																		1342.91	44.8677					1815.9	18.3293					1398.18	28.6585		1409.62
																																		1346.32	54.4408					1820.85	10.8582					1399.38	32.5802		1410.4
																																		1351.18	34.817					1821.07	21.1916					1405.39	20.9616		1411.09
																																		1356.97	77.1743					1828.95	43.2349					1406.47	27.547		1413.91
																																		1361.54	40.9735					1829.79	8.38485					1409.84	44.6341		1415.48
																																		1362.36	20.5445					1830.25	43.4722					1410.32	15.4539		1421.59
																																		1368.42	30.9149					1830.71	14.9862					1415.1	14.4843		1422.72
																																		1369.12	27.8864					1832.19	41.3643					1416.43	43.0998		1423.61
																																		1372.39	20.4307					1832.26	41.8799					1417.02	24.2971		1426.37
																																		1375.58	23.4013					1836.58	12.9995					1419.97	25.3619		1427.35
																																		1383.4	71.5607					1836.64	31.0744					1420.46	37.226		1428.87
																																		1386.29	27.3331					1837.67	35.32					1423.74	57.4608		1429.22
																																		1389.53	21.994					1839.63	18.2289					1430.69	31.425		1430.59
																																		1400.75	30.9548					1840.36	18.12					1431.59	15.2769		1432.22
																																		1403.85	33.4561					1842.23	11.6661					1431.76	33.7671		1432.79
																																		1404.71	23.1363					1843.81	8.00104					1433.59	26.0728		1433.59
																																		1407.32	28.5066					1844.01	11.4501					1434.75	32.6723		1435.93
																																		1414.11	27.6462					1847.53	59.5675					1436.33	17.7371		1438.44
																																		1421.93	25.7479					1847.55	18.1533					1440.9	12.0147		1439.71
																																		1429.13	30.5203					1848.5	48.1357					1440.96	10.4273		1439.85
																																		1429.36	62.8903					1851.02	31.3201					1441.12	8.9229		1440.32
																																		1433.8	69.8911					1851.61	18.5325					1442.55	10.6079		1440.98
																																		1434.3	68.9953					1852.31	18.2853					1447.44	15.4832		1446.47
																																		1439.38	33.8504					1854.25	11.2653					1447.94	12.8704		1447.89
																																		1443.7	26.4728					1854.99	18.0816					1448.55	19.8867		1448.42
																																		1444.47	14.5652					1859.55	11.844					1451.82	28.2833		1449.25
																																		1444.98	21.5252					1859.76	18.895					1451.96	26.6551		1450.3
																																		1447.69	22.0511					1861.39	18.1338					1453.81	40.1903		1450.59
																																		1449.23	28.9626					1863.71	18.056					1453.98	11.8525		1452.08
																																		1449.89	18.4157					1865.67	69.6687					1455.29	19.0197		1455.26
																																		1450.41	11.1689					1868.82	6.51532					1458.73	38.5115		1456.38
																																		1451.04	31.9432					1870.45	33.0745					1459.21	14.6255		1457.26
																																		1451.33	17.3464					1870.65	12.3658					1461.03	8.42744		1457.44
																																		1451.64	19.1378					1875.81	22.3906					1461.86	9.23776		1457.65
																																		1454.03	19.1081					1881.04	18.0219					1467.56	23.5076		1457.77
																																		1457.88	34.6308					1893.14	32.4942					1470.02	29.7724		1458.22
																																		1458.09	28.2257					1899.54	17.9932					1470.64	17.3574		1458.9
																																		1458.54	22.2394					1899.88	56.2487					1471.52	11.2987		1459.13
																																		1459.11	29.213					1903.78	44.3197					1475.41	19.1219		1461.33
																																		1460.7	28.6259					1904.1	17.9834					1485.87	25.4796		1463.26
																																		1461.78	26.6988					1904.25	9.34888					1490.18	40.181		1463.98
																																		1464.96	13.0261					1906.64	17.9737					1502.52	32.5687		1465.56
																																		1466.66	45.7484					1907.15	23.6369					1506.15	22.6991		1473.69
																																		1470.6	30.837					1910.47	11.5225					1514.84	29.8356		1483.94
																																		1471.39	30.5114					1912.12	17.9866					1515.28	38.4858		1603.54
																																		1472.5	29.7734					1912.22	32.9037					1518.18	41.9328		1609.67
																																		1473.14	16.9844					1913.14	10.9315					1544.47	26.5065		1613.56
																																		1473.54	17.8144					1913.65	17.9762					1552.93	29.947		1619.45
																																		1474.97	25.5302					1914.87	12.93					1558.46	52.3307		1620.98
																																		1491.79	25.5732					1916.87	12.001					1572.25	22.3233		1626.27
																																		1494.66	26.4432					1918.46	10.4617					1587.94	29.4165		1645.71
																																		1495.39	29.6753					1918.83	26.8587					1606.55	23.4631		1648.81
																																		1506.08	65.2277					1919.88	18.0002					1606.95	16.9512		1654.25
																																		1598.07	54.3483					1919.89	17.9496					1610.68	42.0447		1656.77
																																		1622.99	19.3453					1920.1	15.7574					1620.06	99.9433		1656.98
																																		1654.24	29.6395					1920.53	17.9679					1624.64	26.1369		1658.77
																																		1706.96	29.738					1920.91	18.005					1629.84	14.4012		1659.35
																																		1774.53	11.4126					1922.13	17.944					1631.08	20.4636		1659.72
																																		1837.02	21.5924					1922.48	10.7639					1636.99	17.9264		1662.39
																																		2527.36	17.6595					1922.94	18.0838					1640.65	22.8866		1662.81
																																		2601.22	13.4333					1923.29	17.9594					1644.49	18.2888		1663.87
																																		2665.37	24.0463					1925.39	8.67226					1646.4	13.501		1665.18
																																		2692.66	18.9633					1925.41	18.855					1648.82	13.9215		1665.52
																																		2725.33	8.25317					1926.24	11.2829					1649.2	18.7714		1665.54
																																		2744.72	7.01354					1927.39	13.7392					1649.58	15.9948		1666.34
																																								1930.11	10.0745					1649.85	32.8978		1667.06
																																								1930.36	13.2729					1652.6	30.6134		1669.69
																																								1931.48	13.7039					1656.79	26.0061		1671
																																								1931.7	23.7432					1657.21	18.1091		1671.97
																																								1933.42	17.9118					1665.73	25.9823		1674.26
																																								1933.5	10.8401					1667.7	13.7878		1674.38
																																								1933.85	12.3955					1672.09	12.4922		1677.91
																																								1936.22	5.50563					1673.03	29.3239		1678.13
																																								1937.02	17.9008					1676.86	15.4289		1678.43
																																								1941.23	30.4613					1678.89	34.735		1680
																																								1946.35	57.0896					1683.36	26.5193		1680.71
																																								1946.6	17.9321					1684.06	38.9785		1680.76
																																								1947.65	28.5439					1687.45	9.77193		1683.61
																																								1950.34	17.9173					1687.57	15.59		1683.77
																																								1950.95	34.4351					1687.64	41.3677		1684.12
																																								1951.02	17.871					1688.02	20.643		1684.42
																																								1951.75	7.95202					1688.06	25.3959		1685.3
																																								1952.23	17.9168					1688.93	22.6931		1686.51
																																								1952.85	20.0474					1691	12.6018		1687.61
																																								1954.84	21.6951					1691.48	24.1019		1688.22
																																								1957.89	7.17268					1691.57	24.0886		1689.99
																																								1958.19	18.6137					1691.75	22.0723		1693.61
																																								1961.02	45.9078					1694.31	21.5236		1695.24
																																								1965.95	35.0595					1694.41	15.4962		1696.91
																																								1967.22	20.1678					1694.92	18.3422		1697.82
																																								1968.36	17.8768					1695.08	9.49048		1698.08
																																								1969.5	5.74997					1696.3	16.8537		1698.53
																																								1971.04	17.882					1697.53	34.6244		1701.52
																																								1971.38	6.52228					1697.54	16.1785		1704.88
																																								1972.55	17.8374					1697.83	48.2133		1704.97
																																								1972.73	14.8209					1698.17	28.9626		1705.01
																																								1981.16	77.3211					1699.48	23.0295		1705.87
																																								1983.77	4.58691					1699.78	27.7045		1706.1
																																								1984.18	30.0502					1700.39	90.2298		1710.38
																																								1994.14	17.9705					1701	34.6774		1710.62
																																								1995.12	17.7955					1702.19	18.4818		1710.98
																																								2033.22	5.49194					1702.84	25.0303		1714.69
																																								2037.79	19.0867					1703.95	30.2466		1715
																																								2038.22	17.6994					1705.55	17.4708		1715.09
																																								2044.94	5.48644					1706.67	40.4854		1717.29
																																								2045.82	17.7945					1707	30.8938		1717.57
																																								2046.5	17.7234					1707.08	31.345		1717.76
																																								2049.41	37.8028					1707.53	37.2027		1718.58
																																								2059.5	17.6755					1707.57	6.28035		1718.63
																																								2066.62	50.8391					1707.84	11.5614		1723.2
																																								2068.09	31.017					1708.5	39.7727		1723.71
																																								2071.44	34.5263					1708.75	33.4732		1724.4
																																								2083.22	7.25724					1710.87	5.68226		1724.47
																																								2089.49	17.5928					1711.12	34.115		1725.54
																																								2104.04	35.1771					1712.89	21.6096		1727.27
																																								2113.86	53.55					1715.22	8.57025		1728.69
																																								2120.07	17.5274					1715.3	27.5438		1729.66
																																								2150.87	6.85949					1716.29	42.8245		1733.12
																																								2196.77	17.3964					1717.47	16.1142		1734.18
																																								2208.89	12.8568					1717.63	15.0784		1734.34
																																								2211.1	17.379					1720.96	34.4372		1735.05
																																								2278.87	64.3532					1722.42	26.7382		1737.76
																																								2282.08	17.2264					1722.81	35.0743		1738.73
																																								2300.59	17.1907					1722.82	29.1962		1741.07
																																								2305.57	22.2029					1723.11	6.5722		1741.13
																																								2318.34	18.5498					1723.71	36.754		1741.6
																																								2323.58	13.2365					1724.06	24.0531		1743.52
																																								2324.11	17.1637					1726.48	29.8381		1744.03
																																								2328.13	36.9758					1727.03	5.27303		1747.95
																																								2347.39	14.1776					1728.05	11.843		1748.51
																																								2353.78	30.632					1728.12	36.087		1751.62
																																								2362.79	9.40061					1731.71	17.3123		1755.03
																																								2374.46	22.3447					1734.95	29.8136		1755.3
																																								2376.96	17.131					1737.17	19.5246		1756.14
																																								2379.69	19.9513					1738.2	24.5297		1759.24
																																								2389.04	11.431					1740.07	8.9359		1761.82
																																								2433.49	16.9629					1742.72	27.6067		1765.81
																																								2494.62	16.8723					1745.95	17.8951		1766.06
																																								2531.72	16.669					1748	20.9755		1769.47
																																								2534.09	16.7998					1749.1	18.3828		1770.44
																																								2537.57	16.8389					1750.15	38.4709		1772.13
																																								2547.86	19.6167					1751.79	11.3295		1782.59
																																								2555.72	6.57216					1753.48	6.3382		1784.53
																																								2559.23	28.1881					1754.04	18.7351		1786.15
																																								2564.34	3.73231					1754.6	45.1615		1789.32
																																								2565.51	9.75339					1757.56	27.0749		1795.49
																																								2566.59	17.2375					1757.69	9.29492		1796.62
																																								2572.95	6.27299					1759.14	5.54674		1810.01
																																								2579.31	27.3765					1760.19	29.7288		1818.8
																																								2580.76	8.73313					1762.21	24.9785		1821.82
																																								2600.78	16.6693					1764	42.9025		1828.09
																																								2606.13	19.5416					1773.36	4.26378		1831.68
																																								2609.97	6.33495					1774.39	12.2147		1841.14
																																								2613.59	16.651					1783.91	11.806		1844.33
																																								2618.14	16.6546					1784.42	13.9224		1845.21
																																								2621.69	16.6478					1785.18	43.0379		1860.36
																																								2622.01	16.6483					1785.9	36.3453		1877.96
																																								2631.62	28.6524					1789.32	32.6209		1893.17
																																								2633.9	16.618					1793.23	28.6474		1911.44
																																								2672.81	15.8744					1796.17	20.2547		1916.4
																																								2677.14	16.5972					1798.06	8.57581		1925.56
																																								2683.55	22.844					1800.39	19.6355		1929.48
																																								2683.83	16.5699					1806.68	8.37209		1967.12
																																								2689.28	16.5415					1834.1	47.5696		2057.8
																																								2689.7	16.5988					1837.11	23.6583		2071.23
																																								2698.69	6.82402					1872.79	40.6306		2086.21
																																								2702.36	7.10373					1885.43	34.3297		2092.79
																																								2703.48	5.52367					1954.84	25.9098		2123.89
																																								2703.72	3.22625					2341.7	35.1475		2132.41
																																								2716.66	16.5233					2553.19	23.1905		2144.21
																																								2724.27	6.39985					2567.79	6.17291		2589.04
																																								2724.48	16.4772					2734.37	2.80861		2630.28
																																								2748.15	9.26577					3466.56	4.54527		2679.78
																																								2760.91	35.2254								2686.42
																																								2776.51	4.17766								2745.42
																																								2800.44	50.9574								2763.8
																																								2802.47	16.5388								2876.63
																																								2806.85	16.2752
																																								2812.23	50.5565
																																								2825.22	5.10124
																																								2849.32	13.1645
																																								2925.98	25.6616
																																								2985.09	16.0968
																																								3159.96	15.8807
																																								3314.67	15.6834
																																								3333.11	15.6581
																																								3361.01	3.37723
[truncated: 71 more columns]

## Sheet: Mississippian
	For generating pie diagrams
	Inferred source	lower limit	upper limit		age ref
	1. Appalachian plutons	0	480		Park, H., Barbeau, D.L., Rickenbaker, A., Bachmann-Krug, D., and Gehrels, G., 2009, Application of Foreland Basin Detrital-Zircon Geochronology to the Reconstruction of the Southern and Central Appalachian Orogen, Journal of Geology, v. 118, p. 23-44.
	2. Suwanee/Meguma	540	700		Park, H., Barbeau, D.L., Rickenbaker, A., Bachmann-Krug, D., and Gehrels, G., 2009, Application of Foreland Basin Detrital-Zircon Geochronology to the Reconstruction of the Southern and Central Appalachian Orogen, Journal of Geology, v. 118, p. 23-44.
	3. Grenville crust	950	1300		Whitmeyer, S.J., and Karlstrom, K.E., 2007, Tectonic model for the Proterozoic growth of North America. Geosphere, v. 3, p. 220-259.
	4. OK-CO Aulacogen	530	540		Hanson, R. E., Puckett, R. E, Jr., Keller, G. R., Brueseke, M. E., Bulen, C. L., Mertzman, S. A., Finegan, S. A., & McCleery, D. A.,2013, Intraplate magmatism related to opening of the southern Iapetus Ocean: Cambrian Wichita igneous province in the Southern Oklahoma rift zone. Lithos, 174, 57-70.
	5. Granite/Rhyolite	1300	1500		Whitmeyer, S.J., and Karlstrom, K.E., 2007, Tectonic model for the Proterozoic growth of North America. Geosphere, v. 3, p. 220-259.
	6. Yavapai/Mazatzal	1600	1800		Whitmeyer, S.J., and Karlstrom, K.E., 2007, Tectonic model for the Proterozoic growth of North America. Geosphere, v. 3, p. 220-259.
	7. 1.8-2.0 Ga	1800	2000		Whitmeyer, S.J., and Karlstrom, K.E., 2007, Tectonic model for the Proterozoic growth of North America. Geosphere, v. 3, p. 220-259.
	8. Archean craton	2500	4000		Whitmeyer, S.J., and Karlstrom, K.E., 2007, Tectonic model for the Proterozoic growth of North America. Geosphere, v. 3, p. 220-259.
	5. Midcontinent rift	1096	1107	Paces and Miller (1993)
	Park et al. (2009)																		Xie et al. (2016a)			Chapman and Laskowski (2018 - this study)									Xie et al. (2016b)			Thomas et al. (2017)			May et al. (2013)			Gehrels and Dickinson (2000); Gehrels and Pecha (2014)			Gehrels et al. (2011)			Attia et al. (2018)			Riley et al. (2000)
	Plate 3B sample #1	Mississippian Price Ss.		Plate 3B sample #2	Mississippian Grainger Fm.		Plate 3B sample #3	Mississippian Mauch Chunk Fm.		Plate 3B sample #4	Mississippian Hinton Fm.		Plate 3B sample #5	Mississippian Princeton Fm.		Plate 3B sample #6	Mississippian Bluestone Fm.		Plate 3B sample #7	Mississippian Wedington Ss. - ALL SAMPLES COMBINED; <900 Ma: 6/8; >900 Ma: 7/6		Plate 3B sample #8	Mississippian Aux Vases Ss. (14MO3 - 16S, 236940E, 4200921N)		Plate 3B sample #9	Mississippian Ste. Genevieve Fm. (Amoco#1 Puyear well; 14S, 264382E, 4164452N)		Plate 3B sample #28	Mississippian Kibbey Fm. (180713SWC3 NAD83, -109.32626, 46.71101)		Plate 3B sample #10	Mississippian Parkwood/Pride Mountain formations. - ALL SAMPLES COMBINED; <900 Ma: 6/8; >900 Ma: 7/6		Plate 3B sample #11	Upper Mississippian Mauch Chunk-Pottsville wedge (KY-21-SG)		Plate 3B sample #12	Lower Pennsylvanian Amsden Fm. (BCRA-01-10)		Plate 3B sample #13	Mississippian Tonka Fm., samples from each reference combined		Plate 3B sample #14	Upper Mississippian Surprise Canyon Fm.		Plate 3B sample #15	Mississippian Mexican Spring Fm.		Plate 3B sample #16
Source	Frequency	Relative Frequency		Frequency	Relative Frequency		Frequency	Relative Frequency		Frequency	Relative Frequency		Frequency	Relative Frequency		Frequency	Relative Frequency		Frequency	Relative Frequency		Frequency	Relative Frequency		Frequency	Relative Frequency		Frequency	Relative Frequency		Frequency	Relative Frequency		Frequency	Relative Frequency		Frequency	Relative Frequency		Frequency	Relative Frequency		Frequency	Relative Frequency		Frequency	Relative Frequency		Frequency
1	16	0.179775		4	0.0444444		12	0.136364		11	0.126437		7	0.076087		1	0.0114943		30	0.0571429		20	0.222222		12	0.131868		20	0.206186		54	0.197802		36	0.122034		11	0.142857		4	0.0208333		32	0.0896359		17	0.2125		3
2	0	0		0	0		0	0		2	0.0229885		2	0.0217391		1	0.0114943		3	0.00571429		1	0.0111111		1	0.010989		2	0.0206186		3	0.010989		4	0.0135593		1	0.012987		1	0.00520833		7	0.0196078		2	0.025		0
3	49	0.550562		76	0.844444		53	0.602273		41	0.471264		70	0.76087		70	0.804598		287	0.546667		37	0.411111		36	0.395604		44	0.453608		89	0.326007		136	0.461017		45	0.584416		3	0.015625		172	0.481793		39	0.4875		2
4	0	0		0	0		1	0.0113636		0	0		0	0		0	0		0	0		0	0		0	0		0	0		1	0.003663		1	0.00338983		0	0		0	0		1	0.00280112		1	0.0125		0
5	15	0.168539		8	0.0888889		19	0.215909		9	0.103448		11	0.119565		12	0.137931		67	0.127619		11	0.122222		16	0.175824		6	0.0618557		37	0.135531		40	0.135593		7	0.0909091		2	0.0104167		49	0.137255		16	0.2		1
6	5	0.0561798		1	0.0111111		2	0.0227273		8	0.091954		2	0.0217391		1	0.0114943		80	0.152381		13	0.144444		12	0.131868		11	0.113402		56	0.205128		41	0.138983		3	0.038961		21	0.109375		61	0.170868		3	0.0375		2
7	1	0.011236		0	0		1	0.0113636		5	0.0574713		0	0		1	0.0114943		25	0.047619		2	0.0222222		10	0.10989		4	0.0412371		15	0.0549451		9	0.0305085		7	0.0909091		121	0.630208		20	0.0560224		2	0.025		12
8	3	0.0337079		1	0.0111111		0	0		11	0.126437		0	0		1	0.0114943		33	0.0628571		6	0.0666667		4	0.043956		10	0.103093		18	0.0659341		28	0.0949153		3	0.038961		40	0.208333		15	0.0420168		0	0		12
sum	89			90			88			87			92			87			525			90			91			97			273			295			77			192			357			80			32
%grains not considered	6.31579			5.26316			8.33333			6.45161			4.16667			4.3956			6.08229			6.25			4.21053			4.90196			9			4.83871			7.22892			16.8831			6.29921			11.1111			17.9487
	U-Pb age	1s error		U-Pb age	1s error		U-Pb age	1s error		U-Pb age	1s error		U-Pb age	1s error		U-Pb age	1s error		U-Pb age	1s error		U-Pb age	1s error		U-Pb age	1s error		U-Pb age	1s error		U-Pb age	1s error		U-Pb age	1s error		U-Pb age	1s error		U-Pb age	1s error		U-Pb age	1s error		U-Pb age	1s error		U-Pb age
	376.078	10.302		374.688	5.3509		393.246	6.18017		391.896	6.53981		406.158	7.20338		470.584	11.7539		398.495	5.248		394.151	7.46798		406.221	5.29435		400.211	4.22008		374.808	6.28188		372.2	7		364.321	12.1341		1764.36	28.2959		381	10		380	10.4		1033
	405.326	4.32131		456.424	4.40641		400.919	5.63625		399.237	4.29711		453.752	4.38151		658.263	6.2577		402.662	4.88909		405.648	5.00933		406.292	6.32457		406.27	3.71544		393.172	3.16797		376.2	5.5		380.684	22.949		1852.48	10.9098		393	25		381.3	14.3		1071
	409.428	3.96698		468.299	7.2271		401.374	3.89134		401.652	8.52777		460.843	12.1419		701.457	10.2355		414.918	5.10972		418.848	5.53996		419.418	5.83434		408.526	3.87145		397.312	6.61349		378	6.5		406.606	13.6287		1784.33	11.0539		410	10		390	11.9		1345
	413.683	4.00689		475.618	4.67666		407.914	4.03182		410.057	3.97288		476.387	13.8223		908.978	39.8975		416.071	2.81535		424.466	4.42768		421.944	5.50732		412.612	3.6841		402.531	3.44489		378.6	6.4		408.894	21.6729		1964.25	19.6398		411	11		392.9	8.8		1713
	419.243	4.05901		498.258	7.57594		413.728	4.00731		418.863	4.05545		476.601	5.78856		959.355	88.9258		418.742	4.17214		424.639	7.6524		430.031	3.68754		413.006	3.71301		404.371	8.37919		382.2	7.3		418.807	8.02051		1962.55	14.173		412	33		406.7	16.2		1777
	419.31	4.05964		998.155	32.5369		450.806	4.5282		423.218	4.09625		476.897	8.18238		962.564	52.9503		429.134	7.43502		427.627	6.40899		438.41	7.1761		416.14	3.15521		421.814	4.47857		388.3	5		435.142	11.1917		1775.22	8.72235		412	9		414.1	12.9		1822
	420.38	4.9243		1010.83	20.2838		453.681	10.6455		423.998	4.10355		479.269	10.3925		974.712	69.1829		435.649	4.14141		429.649	5.36138		450.66	3.13257		416.374	4.45837		423.787	4.13343		394.7	6.8		445.98	14.5327		2041.61	11.9861		413	7		432.4	5.9		1826
	428.129	6.29617		1020.1	59.2346		457.396	7.24136		426.793	4.12971		487.504	5.30566		984.463	61.777		446.508	3.60029		430.529	4.58034		453.32	4.93234		423.55	3.47548		428.904	3.92707		397.9	10.2		446.604	11.6691		2626.17	7.42233		419	12		441.9	9		1828
	431.94	4.17788		1020.2	60.3813		458.479	6.72684		428.654	4.31302		555.873	6.17794		992.907	51.1515		453.892	3.20948		432.587	6.90856		463.495	10.7875		425.248	4.7493		433.714	2.99266		404.9	8.6		447.986	16.3204		2479.08	14.5054		419	9		447.1	8.9		1889
	437.387	10.1914		1022.65	95.4537		461.141	4.45033		441.008	4.26262		592.358	9.96085		993.878	73.5199		471.52	7.65666		434.546	6.80373		465.611	5.56554		426.173	3.98716		434.771	5.72554		417.3	7.4		457.86	12.2515		2075.97	7.25785		425	12		449.5	9.4		1912
	442.625	6.28823		1030.79	70.5936		463.422	20.4351		453.155	5.33866		976.211	22.354		995.089	38.249		411.292	6.41267		440.024	4.2815		469.37	2.68751		427.048	2.94543		436.753	5.22723		418.5	7		464.131	28.425		2717.45	7.47601		427	6		449.7	12.2		1913
	449.903	4.34562		1031.26	62.2983		477.219	4.59984		549.407	8.53168		992.58	57.0385		1000.81	34.7293		436.27	3.64511		440.638	14.7154		469.685	7.97885		429.577	3.26789		442.214	3.79945		419.5	11.8		483.964	23.1815		2085.98	10.9405		434	23		450.9	9.6		2080
	450.524	4.35141		1032.06	29.3097		490.213	6.75014		591.552	7.85665		998.833	97.4792		1005.44	52.9054		436.537	5.48942		446.106	13.2306		555.219	12.1339		429.95	3.9549		457.444	3.46911		421.2	9.3		505.911	12.9732		1954.28	44.2302		436	23		460.7	10.4		2474
	456.973	9.13185		1034.92	56.795		539.927	5.23114		998.638	96.3341		1000.17	20.3381		1017.07	41.7669		441.704	7.04802		464.95	3.44944		923.221	51.2916		431.416	5.19341		464.963	4.36327		421.8	7.2		560.809	16.6941		1907.19	23.6311		440	13		461.4	10		2496
	468.259	4.51657		1035.58	25.6807		876.007	73.8691		1006.16	26.7985		1000.97	52.2255		1018.65	24.7181		442.54	5.10619		465.643	3.00325		935.994	17.028		436.432	4.56723		468.904	3.82943		424.2	9.5		815.121	40.1698		1954.56	12.2166		448	9		464.6	7.5		2524
	472.185	4.55307		1036.02	23.9188		939.007	58.2996		1010.64	86.314		1003.54	30.473		1031.52	59.9326		476.574	7.07327		466.7	3.85427		964.398	63.3805		440.412	5.26638		471.615	8.10941		424.9	7.8		935.459	9.07359		1844.71	14.8957		464	18		471.3	27.9		2583
	498.832	4.8002		1040.65	27.5281		943.82	56.6019		1029.03	20.2516		1012.77	91.9022		1034.11	28.4323		500.151	6.42297		467.777	4.81862		972.941	9.72545		458.742	3.20842		539.703	4.92851		425.2	6.9		952.309	74.325		1870.44	32.7896		470	30		476.5	10.9		2655
	529.776	5.08592		1041.79	41.9827		954.074	23.9487		1036.33	24.2566		1013.77	51.9911		1034.2	41.131		420.173	6.65991		469.819	5.41939		973.334	22.3189		461.104	4.33331		603.051	14.3851		426.6	4.6		963.866	170.218		1824.72	24.772		476	16		481.8	7.7		2655
	917.093	20.5816		1042.24	37.7772		960.138	37.4278		1042.29	56.1068		1014.6	48.082		1036.6	33.3741		421.728	5.93469		470.111	8.13866		973.95	121.445		463.249	4.93731		618.129	7.71835		427.3	6.8		977.532	155.193		1923.29	23.4633		479	12		488.4	19.8		2657
	968.067	67.4583		1043.28	20.1991		961.811	53.8681		1046.42	26.0348		1017.67	51.3666		1037.09	34.6249		430.38	6.30705		471.144	9.60336		977.652	44.0724		470.717	4.98638		705.893	4.75569		430.4	15.2		1007.34	75.544		1795.5	13.484		480	26		539.6	4.8		2827
	970.292	50.532		1044.79	25.2403		989.541	34.5157		1047.62	31.0947		1020.34	30.3925		1042.3	42.0084		439.105	5.56081		493.408	12.9301		1005.94	61.57		557.2	4.75459		803.791	7.92321		431.9	6.5		1012.49	43.8849		1811.68	13.1278		485	28		553.2	20.5		341
	988.669	33.1739		1045.04	39.352		1001.19	76.3086		1047.76	82.3089		1022.08	22.4718		1042.47	52.2315		454.605	6.21696		520.369	13.614		1011.17	43.2766		609.878	5.44425		404.487	3.8329		432.7	11.1		1015.8	35.0924		1776.73	18.4234		538	28		588.1	23.2		347
	989.642	20.901		1045.91	27.8352		1010.09	48.8776		1049.19	30.2516		1024.75	43.2252		1043.85	25.0193		461.565	5.4985		562.111	17.2755		1014.62	71.3148		926.815	14.1654		430.133	4.55974		433.9	8.9		1025.93	29.7824		1830.94	47.1306		548	20		769.5	20.1		351
	992.762	26.0984		1046.13	59.1246		1021.4	31.6219		1049.87	27.2261		1025.15	87.9005		1044.7	39.5456		468.265	6.02711		954.225	57.6856		1016.57	109.648		963.469	38.8417		449.184	4.32188		448.9	10.3		1029.41	65.2374		2655.63	9.97236		570	16		821.5	11.3		1813
	1002.48	35.33		1046.55	27.0279		1022.7	20.2398		1055.06	65.7348		1028.27	29.8951		1048.28	29.8595		473.894	3.19135		967.856	22.0679		1020.57	26.7611		972.516	12.0143		457.341	2.75466		451	6.9		1031.74	60.4334		2525.53	2.6115		624	22		898.8	109.2		1825
	1008.73	33.0792		1050.3	46.1683		1030.05	49.1647		1055.43	30.2581		1034.28	35.9089		1049.56	31.6737		579.301	9.75559		975.113	8.37325		1023.64	32.3926		979.396	12.5197		467.774	3.35602		455.4	11.2		1033.72	14.2036		2043.51	26.699		726	17		936.7	62.3		1847
	1020.9	26.5933		1053.34	25.8287		1031.89	20.2185		1068.39	23.5592		1038.31	22.0245		1049.56	39.11		432.983	3.8481		998.883	7.23386		1027.38	59.2099		983.367	13.1902		470.067	6.77476		455.9	9.8		1037.27	30.2152		2554.7	24.0331		740	15		951.5	52.9		1849
	1028.92	66.8428		1054.76	25.9864		1046.09	20.226		1070.87	76.5608		1038.68	46.6639		1055.26	30.4919		464.064	3.19959		999.45	18.7986		1028.12	33.4599		996.488	15.9136		801.278	14.9074		455.9	8.3		1041.66	77.6909		1134.65	57.6835		868	30		976.4	109.4		1907
	1029.58	35.077		1055.38	29.4222		1047.15	64.9579		1075.4	34.8477		1038.87	20.8264		1055.39	40.0823		564.277	3.40761		1004.9	18.2921		1028.31	37.4245		1005.94	24.4753		367.731	11.5039		456.9	8.7		1048.85	54.6357		1851.35	10.0014		946	60		983.9	72.3		1927
	1043.09	37.2014		1060.78	20.1343		1048.76	37.7297		1076.11	23.0659		1040.92	32.6444		1059.72	20.1603		693.601	7.98493		1008.87	66.068		1034.32	66.8721		1009.82	13.0863		378.542	3.68841		458.7	11.3		1051.81	38.5137		2762.58	3.94686		947	17		997.4	24.2		2053
	1049.3	24.0873		1065.56	35.4379		1052.28	29.6603		1083.12	31.1811		1043.91	27.1858		1061.35	20.1428		428.149	5.60708		1009.7	22.1357		1037.19	43.0898		1013.48	13.7245		401.151	6.21521		461.5	9.3		1053.95	85.0935		1957.35	13.8448		959	81		1002.7	51.3		2148
	1050.53	43.7697		1066.88	36.6975		1053.01	64.5052		1083.45	26.087		1044.18	35.9271		1064.23	23.9422		437.053	5.13794		1010.02	73.5289		1040.17	37.8561		1014.42	18.892		405.538	6.35318		461.8	8		1055.74	64.8396		1892.54	27.1552		962	65		1018.8	11.3		2269
	1053.25	32.851		1068.89	66.3461		1057.35	26.4331		1084.77	60.97		1045.7	24.659		1066.44	20.2389		446.13	5.75711		1015.69	76.859		1051.87	7.48124		1021.82	14.0419		408.117	3.62265		463.6	9		1058.98	122.072		2008.51	10.8737		963	39		1023.1	58.2		2407
	1056.96	33.4351		1069.45	32.5702		1060.49	62.8019		1097.1	20.0261		1046.34	20.2312		1069.03	40.0255		459.624	4.66344		1019.41	143.574		1054.23	14.4183		1028.34	17.4297		408.592	2.77743		468	6.7		1060.95	69.5927		2696.61	11.1126		965	93		1030	27.5		2585
	1058.42	29.7308		1069.75	85.7692		1062.39	26.3919		1100.04	35.0331		1049.61	60.8909		1070.13	63.8181		481.11	5.55612		1021.08	16.2812		1060.51	82.8379		1031.86	14.0205		412.325	5.45544		471.3	8.4		1064.22	35.9912		1886.49	16.6859		965	68		1037	61.3		2621
	1066.56	23.3508		1069.83	48.6449		1068.55	36.9916		1103.72	29.2695		1053.91	61.9359		1076.53	44.0546		500.974	7.47776		1023.06	11.7192		1061.82	31.4342		1035.45	19.8444		416.232	4.6949		474.3	7.9		1066.37	45.9371		2088.66	18.5765		976	44		1040.8	48.6		2669
	1069.22	50.2053		1070.05	48.6612		1069.79	59.0975		1116.92	48.3376		1054.13	24.1751		1082.64	20.0773		508.386	10.0007		1031.22	30.0248		1063.62	29.784		1045.17	12.5416		425.809	5.87561		532.4	9.4		1068.95	48.7195		1817.69	49.1441		979	53		1047.3	69.5		2725
	1071.93	20.1004		1071.08	27.3312		1072.46	20.2022		1118.15	62.289		1054.67	50.5837		1091.9	41.632		890.303	13.6345		1035.84	58.0423		1064.42	17.8562		1046.65	9.90448		427.135	5.3839		547.3	11.2		1074.68	27.6853		1861.74	35.4626		984	47		1049.3	29.6		2729
	1081.25	39.0869		1076.27	39.0019		1073.96	45.6023		1119.76	78.3074		1056.97	32.8621		1093.09	62.049		1006.93	27.4781		1041.42	9.78733		1069.77	25.1305		1046.74	14.6628		429.323	6.11865		563.5	9.8		1075.82	25.6619		1883.66	35.9217		999	33		1049.5	24.5		2936
	1084.59	91.5142		1080.98	25.6888		1083.94	20.0604		1123.52	44.2655		1059.9	24.375		1102	49.0767		937.169	20.1447		1049.6	49.1189		1075.66	18.1133		1057.45	17.5644		432.371	2.11671		600.9	7.8		1076.23	21.3669		2602.52	5.50019		1001	35		1051.4	171.3
	1089.87	32.6913		1085.11	27.2876		1087.74	39.7129		1124.42	81.8065		1060.07	33.1035		1122.46	27.5683		1023.54	12.4683		1055.66	31.0031		1084	18.8806		1057.82	35.3056		441.001	7.53416		637.7	13.4		1079.33	42.9894		1842.35	34.9108		1006	45		1062.1	73.1
	1095.9	34.477		1092.16	46.6834		1087.78	32.873		1129.91	87.4979		1064.2	38.0556		1123.96	60.9283		997.265	15.0941		1055.94	89.7773		1099.32	62.3137		1059.34	18.4116		442.52	3.35975		936.1	55.5		1081.25	28.0255		1810.91	31.9986		1008	35		1063.1	30.8
	1127.02	21.7204		1096.67	70.7678		1089.08	41.2821		1145.69	57.689		1064.43	28.7493		1127.46	35.2926		974.278	15.8679		1058.4	140.622		1099.94	77.1658		1067.6	15.7951		443.748	3.9093		963.4	25.3		1088.32	66.4237		2005.54	10.2678		1011	62		1064	27.2
	1127.36	35.0797		1101.96	47.2389		1091.89	29.8747		1161.76	57.3401		1068.42	20.1091		1131	44.1634		996.378	11.9284		1065.53	29.5946		1119.14	37.0265		1068.69	11.476		470.681	6.4864		969.4	60.5		1090.04	33.7676		2603.41	30.3024		1012	55		1075.2	35.8
	1129.38	46.4031		1107.56	43.418		1093.37	34.4507		1169.91	85.5876		1069.32	30.766		1131.02	30.8811		1030.29	13.7917		1069.35	16.1257		1121.05	54.3493		1075.27	12.0829		575.38	5.06257		994.9	49.5		1094.44	44.5184		1789.99	56.1356		1012	28		1090.5	38.6
	1145.95	21.3245		1109.24	62.0268		1093.59	32.8915		1180.87	35.464		1070.75	20.6984		1137.41	19.9205		973.813	27.5626		1070.62	75.4873		1125.8	33.2991		1077.86	14.6091		377.503	3.32317		1001.5	28.3		1097.67	34.4741		1915.12	14.0612		1017	98		1101.3	54.5
	1146.97	38.4973		1112.57	86.7727		1101.43	55.8352		1196.59	105.603		1072.85	55.4801		1139.5	72.2732		1097.72	20.9915		1072.45	101.248		1133.98	44.1591		1088.36	15.1757		397.485	4.37495		1003.6	33.9		1098.76	83.7634		1845.99	14.87		1019	59		1127.6	60
	1154.02	21.649		1118.43	28.9541		1109.01	19.9882		1211.84	34.2548		1073.42	26.5854		1140.35	48.4322		1038.9	25.5923		1072.65	11.3718		1138.96	18.329		1106.06	14.1588		405.296	2.43474		1004.8	29.3		1099.98	75.7936		1936.87	10.7698		1021	34		1128.8	31.5
	1156.62	39.9095		1118.58	44.0135		1114.07	43.8176		1231.93	56.2535		1075.7	21.0885		1141.06	75.4753		986.63	16.7032		1082.17	44.1177		1140.74	12.8525		1113.72	9.58696		421.657	3.46861		1007.7	55.5		1108.33	28.3286		1808.15	8.15991		1022	48		1129.1	119.8
	1157.92	29.23		1123.49	43.2707		1129.32	51.6499		1236.21	29.261		1093.69	77.3408		1141.94	19.9088		1052.13	24.333		1083.95	27.1105		1167.34	10.348		1121.59	11.3728		433.899	2.24261		1007.8	25.8		1123.02	162.245		2190.47	14.0266		1024	63		1142.7	72.4
	1164.21	30.8474		1124.84	38.3273		1146.55	21.2801		1270.17	100.795		1098.3	22.4528		1147.12	24.4522		1048.82	17.811		1084.33	20.6599		1208.08	36.5595		1134.46	11.3758		436.092	7.88494		1010.3	32.4		1133.07	71.3559		1859.61	38.8538		1028	7		1144.4	100.3
	1164.7	28.6778		1127.05	64.434		1148.16	19.8717		1282.96	62.0583		1101.47	41.4174		1148.5	58.9102		1076.92	15.5315		1087.06	16.6507		1302.34	113.785		1137.55	25.7923		437.547	2.54015		1010.6	25.5		1139	100.721		2206.84	18.1213		1029	67		1146	37.6
	1169.32	24.202		1133.89	37.8834		1154.7	32.8035		1283.63	79.8286		1112.2	38.6384		1155.4	48.6834		1046.33	19.835		1093.11	39.4724		1311.87	46.4954		1152.29	15.5476		441.003	2.76254		1011.6	46.8		1157.94	31.7185		1807.68	15.2885		1036	30		1149.7	22.2
	1170.15	23.0279		1136.83	23.2801		1155.84	43.0734		1291.78	100.548		1115.45	20.0632		1160.75	42.7026		1127.47	20.423		1095.98	32.165		1336.5	33.6659		1163.45	10.6282		444.755	6.43322		1011.9	31.7		1160.89	42.2382		1940.15	11.8161		1036	48		1161.1	47.9
	1170.5	42.9906		1139.96	32.6343		1166.43	30.5116		1301.46	64.572		1123.73	93.1265		1166.83	28.7574		1052.94	13.8919		1139.09	17.4317		1343.92	28.425		1171.88	17.3306		462.245	8.02632		1014.6	39.5		1175.99	138.801		1792.8	7.72947		1036	47		1162.3	35.9
	1176.35	63.5288		1149.34	49.7345		1168.95	29.5902		1329.74	19.7506		1124.51	24.1335		1168.7	51.8352		1078.19	21.4886		1184.59	32.5586		1349.27	12.7231		1175.76	13.5408		463.822	3.61117		1017.6	37.2		1184.61	27.455		2679.22	10.4014		1041	60		1164.7	16.7
	1185.75	32.9347		1156.03	22.0909		1172.37	31.7285		1344.82	77.2345		1141.46	19.9057		1168.79	36.847		1061.59	28.8519		1186.12	12.9257		1358.97	43.0386		1181.92	44.9107		466.392	3.87886		1017.9	29.3		1191	16.6771		1847.68	45.7131		1042	33		1169.9	41.9
	1194.33	19.7323		1159.7	43.2722		1179.01	22.3534		1356.35	25.6467		1147.99	22.6496		1180.49	45.5536		1134.93	17.9376		1195.28	32.8285		1371.5	19.7325		1185.07	16.0848		466.493	2.90495		1020.1	30.7		1193.98	50.1749		2072.69	28.232		1042	44		1171	29.9
	1221.32	40.2183		1166.04	24.5815		1179.43	70.842		1360.5	37.4909		1151.88	98.3456		1183.93	49.0297		979.272	19.6537		1200.89	26.8229		1382.59	11.5735		1189.83	10.9682		466.765	2.65512		1021.9	41.4		1208.86	54.9676		1837.32	38.2696		1043	54		1187.6	9.9
	1221.66	98.4116		1170.75	24.878		1181.21	19.7728		1381.28	60.7432		1156.95	19.8463		1198.08	74.3713		1003.85	26.2996		1287.33	18.3207		1394.22	3.2586		1192.63	14.5968		470.521	12.4568		1026.4	33.4		1209.17	69.3239		1844.14	30.961		1047	26		1212.8	23.4
	1222.8	30.0748		1170.96	22.1852		1182.56	32.9171		1468.1	39.8897		1158.87	52.2178		1202.41	44.1637		1074.62	16.4407		1320.04	15.3691		1464.41	49.1248		1199.88	12.0645		473.578	3.2168		1029	22.7		1238.66	29.1765		346.445	3.7123		1050	51		1214.9	19.1
	1222.93	45.9879		1171.09	29.5608		1183.99	20.5721		1474.93	48.389		1160.99	45.6127		1207.85	29.5908		1041.14	15.5978		1336.51	18.9309		1469.06	46.6942		1210.35	17.4771		486.547	7.54036		1029.6	33.6		1330.72	20.4165		1886.86	47.833		1054	34		1216.1	9.8
	1233.42	32.1923		1177.52	22.7484		1197.45	75.2222		1498.46	50.2088		1161.78	32.5492		1214.6	34.6248		1032.36	15.9024		1339.04	11.1147		1471.57	13.5231		1213.33	13.2819		915.517	115.15		1031.2	35.7		1345.37	26.3319		2777.38	9.43708		1056	45		1234.9	22.7
	1234.96	19.6203		1178.39	21.3822		1197.94	48.9166		1503.81	60.8709		1164.63	19.8787		1217.51	47.2122		1015.29	11.2435		1349.57	23.5201		1483.93	48.2047		1222.1	15.2507		993.809	22.0346		1035.9	31.3		1398.55	13.9659		2617.3	6.38074		1056	55		1240.6	41.7
	1253.3	29.3728		1179.49	32.6922		1211.22	22.2679		1513.75	18.885		1165.04	25.3751		1224.48	67.6562		1104.09	21.2366		1387.84	5.27072		1488.57	16.3784		1236.36	11.8258		994.812	23.3927		1036.8	27.3		1405.74	29.8383		1854.16	31.8464		1060	50		1245.6	17.9
	1258.51	39.9791		1182.68	25.1459		1223.97	30.0868		1524.7	37.9091		1171.42	41.6182		1224.88	28.7417		1067.49	12.869		1396.42	13.5731		1490.12	24.403		1260.94	15.0452		1012.43	21.0536		1037.7	32		1409.43	37.7251		2024.28	71.5891		1066	15		1316	121.1
	1270.37	19.5247		1184.69	41.5308		1231.45	38.4801		1535.4	105.596		1176.47	32.2852		1228.69	86.8895		1070.77	13.8278		1419.58	56.1347		1492.87	20.1031		1294.44	10.5761		1031.64	52.2899		1038.7	30.3		1470.36	133.217		2616.45	6.70674		1066	38		1328.6	53.6
	1286.23	21.228		1189.45	43.0734		1258.57	45.9616		1550.02	22.9308		1186.82	19.7603		1229.3	30.0644		1060.38	19.8014		1448.89	8.57375		1511.2	6.59357		1302.94	16.0992		1036.97	39.5458		1038.8	25.4		1479.79	27.0943		1824.86	82.1199		1068	52		1337.6	31.8
	1325.78	20.158		1193.67	53.5507		1278.02	80.7302		1583.34	87.1931		1188.93	26.8763		1237.77	65.9082		1061.85	25.3358		1453.15	27.7917		1559.02	93.919		1317.81	9.89316		1044.05	10.8349		1039	50.4		1516.6	35.8621		2663.54	10.0293		1069	28		1338.1	29.4
	1334.68	41.5431		1205.12	40.1955		1297.16	70.8256		1618.96	62.4653		1190.04	19.7626		1242.14	45.8651		1170.18	24.7702		1463.66	10.6047		1618.92	19.2986		1323.18	14.1585		1053.41	47.0179		1039.4	35.4		1661.05	14.779		2219.41	7.13215		1070	39		1358.8	21.6
	1337.66	35.9797		1220.64	33.8818		1300.46	20.7973		1622.24	57.6938		1191.58	46.9854		1269.53	42.5843		1054.98	15.0158		1491.5	9.54208		1648.11	14.0722		1372	11.2652		1070.09	15.7961		1042.7	63.8		1661.2	57.0871		1843.86	11.7006		1071	25		1367.7	22
	1350.2	21.8306		1222.91	20.4604		1300.82	30.7361		1661.78	20.0725		1196.82	24.6729		1273.74	20.4665		1108.64	11.694		1505.18	9.57745		1650.8	8.90353		1425.07	11.1885		1088.75	9.80947		1043.7	26		1792.55	24.7387		1850.18	24.2674		1072	24		1392.6	99.6
	1355.5	28.0144		1224.11	36.5565		1302.86	53.0929		1681.05	18.4671		1200.43	43.4186		1292.48	39.8902		1057.8	23.4084		1507.29	16.1088		1653.96	16.2453		1476.98	11.6806		1120.11	11.7324		1045.1	67.2		1822.44	12.7704		1984.98	10.7397		1074	53		1410.4	22.2
	1409.04	35.4373		1235.63	47.4151		1317.35	65.0187		1722.91	58.9786		1204.43	28.7726		1297.81	46.4309		1056.22	12.6085		1545.91	10.6031		1661.55	11.7716		1503.54	11.7284		1123.98	28.9093		1046.4	40.5		1861.04	16.2135		1851.04	25.6041		1075	73		1430.3	18.4
	1412.9	26.46		1247.97	30.4996		1318.57	29.8708		1730.87	106.914		1212.73	53.5456		1347.08	37.0771		1180.4	10.5183		1586.12	11.9515		1662.24	25.4431		1577.21	10.9807		1138.21	36.7141		1047.5	32.1		1864.34	8.07191		1801.58	15.5261		1076	49		1435.9	7
	1414.21	26.6158		1258.27	37.7867		1330.57	91.0565		1740.78	22.364		1218.09	36.3864		1372.33	46.975		1020.53	16.9472		1606.36	22.103		1670.35	24.2096		1598.5	15.8079		1152.64	9.82729		1051.4	31.5		1889.48	25.9089		2732.41	11.9971		1078	46		1468	86.6
	1436.74	27.8708		1259.95	60.8005		1347.48	19.329		1781.86	41.3887		1231.56	75.2002		1373.63	29.8775		1077.42	21.7779		1620.82	12.3443		1746.93	6.49349		1611.92	11.8528		1152.92	8.62717		1052.5	32.5		1897.59	10.0612		2495.6	8.59983		1079	39		1472.7	13.7
	1438.38	32.0447		1261.02	21.308		1366.64	35.0751		1850.09	18.0847		1249.54	19.5931		1377.45	19.2413		1112.03	20.912		1622.92	25.8897		1753.74	8.89353		1637.04	11.7063		1199.15	10.0247		1055.4	43.1		1911.13	6.96266		1897.07	29.203		1080	36		1490.4	17.1
	1449	25.3441		1265.27	35.6067		1373.12	29.8385		1881.89	18.019		1251.57	27.029		1428.33	84.2351		1064.38	22.3797		1647.74	15.6315		1755.66	10.0533		1651.12	9.68026		1215.56	51.3271		1056.4	44.4		1916.83	28.9138		1861.14	9.99541		1081	21		1490.6	9.7
	1465.51	78.8747		1280.31	43.566		1406.64	75.0903		1899.21	18.0001		1256.41	54.9878		1428.67	42.967		1094.37	19.1108		1649.26	2.95282		1755.78	14.5593		1656.26	12.1227		1242.54	22.0514		1057	27.3		2048.53	20.6938		1854.32	8.42355		1082	70		1490.9	17.9
	1473.91	61.6801		1297.07	76.2689		1432.41	45.7983		1916.64	40.7036		1316.47	74.4815		1454.15	30.0287		1069.32	15.3272		1651.71	12.7499		1794.32	36.4062		1663.6	12.8218		1246.78	169.161		1057.2	30.2		2727.21	8.79574		1864.83	60.2434		1082	27		1492.6	25.2
	1487.14	25.1976		1301	90.5903		1441.16	28.7836		1997.89	57.5527		1325.54	89.2223		1456.75	55.3539		1130.96	22.1899		1688.36	9.64982		1810.27	4.46365		1676.71	12.9988		1262.61	18.7352		1057.8	35.7		2816.01	11.8081		1856.18	87.3822		1083	78		1541.3	17.9
	1496.26	32.0121		1348.74	19.3145		1451.16	19.059		2631.36	46.0947		1392.32	27.2515		1461.62	32.9448		1098.72	31.0471		1693.39	11.7172		1839.32	6.738		1688.33	10.7917		1315.75	23.8387		1058.9	28.7		2858.09	8.77946		1949.59	19.8662		1089	167		1560.7	7.5
	1559.73	18.7643		1387.24	20.8237		1465.88	26.5957		2683.83	43.664		1397.03	51.0125		1470.22	18.9928		1221.45	16.1031		1720.09	5.83548		1841.57	19.5422		1749.99	12.9702		1341.78	15.3556		1060.9	37.4					2006.74	13.6763		1090	54		1567.8	13.1
	1563.98	26.4457		1457.91	19.0291		1469.77	39.6819		2727.37	16.7983		1399.54	49.2745		1474.47	44.5147		1115.51	16.5487		1729.32	8.59365		1850.84	16.9021		1750.28	9.03789		1376.64	8.2013		1061.8	38.3					2567.99	12.1995		1099	13		1635.1	25.6
	1571.81	18.9662		1463.01	53.985		1473.32	31.5092		2732.3	33.7514		1400.02	31.6441		1474.94	27.7007		1080.59	21.1359		1752.95	6.61556		1875.44	8.03741		1758.7	8.98259		1387.04	7.45212		1062.3	26.6					1765.38	42.5125		1106	31		1650.6	15.3
	1610.88	18.6956		1482.45	22.1752		1478.35	24.8474		2766.81	27.5746		1423.46	27.0153		1502.77	58.0687		1099.4	17.3929		1762.35	14.672		1882.39	16.6517		1777.48	11.3891		1389.76	30.1565		1063.2	22.7					1786.5	10.8178		1107	49		1754.1	27.8
	1646.58	24.3026		1491.42	25.186		1493.07	58.6861		2767.4	16.4076		1481.66	34.7606		1527.01	32.4358		1217.71	20.8062		1776.77	4.32398		1898.61	72.1019		1815.54	12.1735		1432.09	22.4869		1065	37.8					340.154	7.56207		1116	17		1838.8	22
	1689.77	26.9807		1496.65	18.9286		1498.85	28.5715		2772.33	29.208		1484.54	22.7419		1681.35	39.7072		1154.24	16.4765		1888.6	2.81828		1899.33	19.3211		1826.21	9.12008		1456.56	7.10496		1065.4	37.3					1843.55	31.0104		1117	55		1907.6	17.4
	1718.99	62.0406		1563.56	42.0049		1502	48.0294		2773.29	42.244		1491.55	30.1674		1849.42	26.9486		1128.72	16.9385		1908.84	7.65855		1919.09	23.5725		1840.08	10.0062		1503.31	13.0718		1067.9	37.2					1823.46	17.77		1118	47		2078.7	28.9
	1739.54	30.4399		1590.65	66.633		1523.34	39.8833		2891.01	18.6758		1499.83	34.6135		2750.59	25.4819		1126.51	18.7187		2601.52	18.743		1992.48	8.00773		1893.15	10.9195		1508.46	12.2703		1068.3	39.9					1858.56	22.8964		1118	50
	1950.43	31.0509		1719.35	53.9047		1588.67	24.3518		2911.24	16.21		1512.07	23.8025					1155.89	11.4346		2614.11	3.69324		2551.5	6.17461		2308.87	10.0399		1513.26	9.42405		1069.3	45.5					1887.59	75.4241		1129	47
	2716.79	34.9551		2130.93	23.9861		1594.6	24.8341		2950.25	40.8644		1518.63	20.9482					1162.54	19.31		2666.3	4.25156		2728.98	8.98139		2643.61	10.1564		1554.09	11.4258		1070.4	46.3					2092.61	22.4671		1130	60
	2731.96	26.3422		2276.39	82.218		1631.32	36.4282					1661.55	43.3246					1149.18	10.8747		2678.09	6.8086		2795.41	8.70359		2675.23	9.45676		1626.39	8.37468		1071.3	39.5					1835.9	16.1208		1144	56
	2872.8	19.1856		2678.78	16.5475		1719.26	30.5273					1662.43	18.5196					1090.56	31.1182		2680.51	13.6953		2850.34	7.32148		2717.47	9.01411		1649.08	7.10973		1072.3	39.8					1777.32	30.4311		1148	82
							1870.82	18.0465					2006.5	33.2012					1138.11	13.0458		2742.79	16.5931					2741.11	10.1559		1655.17	7.88499		1073.7	27					1917.05	45.8799		1152	30
																			1155.92	18.4776								2742.63	11.5388		1659.1	13.3089		1074.1	38					1925.61	68.4466		1156	43
																			1179.48	9.61064								2764.9	10.5208		1661.49	3.62266		1074.7	29.2					1385.24	32.7115		1158	49
																			1083.4	22.6014								2794.4	11.3674		1668.99	15.228		1075.4	44.4					2703.76	9.6569		1169	58
																			1167.1	17.8918								2835.94	27.6179		1672.51	11.0825		1076.1	63					2598.23	5.78832		1177	29
																			1167.35	18.7765								2902.06	7.21864		1705.89	15.2687		1079.6	42.4					1875.43	12.6974		1179	41
																			1175.48	10.4406								2912.13	8.32288		1723.7	30.1449		1080.1	58.6					1861.53	132.331		1182	36
																			1237.09	18.9491											1813.96	5.29846		1080.9	37.5					2084.9	27.5507		1190	43
																			1138.02	18.7904											1875.93	15.1022		1085.7	54.2					1861.02	25.46		1191	25
																			1223.34	16.5871											1888.91	11.4032		1088.4	23.2					1818.1	16.0521		1191	10
																			1148.81	13.1632											2076.23	37.8756		1089.2	30.5					340.154	7.56207		1195	21
																			1224.18	36.219											947.028	110.992		1089.9	29.6					346.445	3.7123		1203	59
																			1228.96	14.1728											964.108	19.7648		1089.9	44.3					1134.65	57.6835		1207	21
																			1338.49	11.9369											990.424	66.2142		1090.1	30.5					1385.24	32.7115		1207	29
																			1333.38	9.82134											1005.35	67.3888		1090.3	34					1764.36	28.2959		1215	40
																			1349.83	13.4272											1007.47	41.5332		1090.5	26.1					1765.38	42.5125		1215	72
																			1385.97	17.7925											1018.37	29.2698		1090.7	36.1					1775.22	8.72235		1230	44
																			1378.03	15.7013											1022.17	29.9307		1092.1	56.5					1776.73	18.4234		1233	68
																			1343.42	9.95273											1023.2	58.4835		1092.4	46.7					1777.32	30.4311		1238	58
																			1497.54	10.7454											1032.54	63.5282		1096	31.5					1784.33	11.0539		1244	39
																			1441.8	15.1279											1033.07	11.2532		1096.2	38.3					1786.5	10.8178		1246	46
																			1616.74	13.7839											1035.73	37.3455		1096.7	29.9					1789.99	56.1356		1246	71
																			1643.31	10.1202											1039.39	50.412		1097.1	40.1					1792.8	7.72947		1251	26
																			1613.71	10.081											1045.86	40.6391		1098.6	27.2					1795.5	13.484		1256	34
																			1664.81	15.2809											1051.16	12.8312		1100.1	19					1801.58	15.5261		1260	27
																			1662.69	15.7931											1057.69	58.1968		1101.3	52.6					1807.68	15.2885		1268	29
																			1644.27	10.039											1062.63	62.9656		1101.8	23.7					1808.15	8.15991		1275	73
																			1649.5	14.0433											1065.54	65.7768		1104.6	32.1					1810.91	31.9986		1308	34
																			1664.57	15.3945											1079.91	60.79		1105.1	33.9					1811.68	13.1278		1315	45
																			1656.34	12.669											1087.3	62.5892		1105.9	36.6					1817.69	49.1441		1324	67
																			1808.17	12.6595											1103.5	47.9903		1108.2	39					1818.1	16.0521		1327	31
																			1790.44	8.94599											1119.64	55.9054		1108.5	19.3					1823.46	17.77		1358	17
																			1819.85	11.553											1121.12	26.1188		1109.7	30.3					1824.72	24.772		1365	87
																			1806.73	8.55063											1124.67	32.4781		1113.9	44.3					1824.86	82.1199		1380	36
																			1807.37	14.4486											1124.73	32.2869		1115.5	29.3					1830.94	47.1306		1394	34
																			1798.51	14.2067											1139.61	44.7039		1115.8	43.5					1835.9	16.1208		1403	69
																			1853.52	12.3958											1140.08	29.8065		1116.7	40.7					1837.32	38.2696		1408	40
																			2095.62	17.2943											1144.96	26.55		1118.5	28.4					1842.35	34.9108		1410	53
																			2186.32	9.17076											1146.41	6.85724		1122.5	24.8					1843.55	31.0104		1411	29
																			2686.86	12.3668											1149.17	159.487		1125.4	26.2					1843.86	11.7006		1418	45
																			2730.9	10.1395											1191.48	19.8002		1126.8	38.1					1844.14	30.961		1419	15
																			2488.51	6.60951											1328.72	19.0064		1130.1	50.7					1844.71	14.8957		1432	65
																			2546.8	5.47505											1345.9	5.74072		1133.8	24					1845.99	14.87		1433	43
																			2638.63	15.2008											1366.74	48.2742		1134.1	42.9					1847.68	45.7131		1438	19
																			2768.65	10.6162											1373.45	18.5126		1134.4	48.6					1850.18	24.2674		1442	7
																			2775.6	11.0108											1382.72	8.78573		1145.9	31.3					1851.04	25.6041		1446	19
																			2824.47	14.2942											1392.69	11.874		1146.3	45					1851.35	10.0014		1447	50
																			2700.95	10.4374											1400.45	33.2092		1146.8	29.8					1852.48	10.9098		1450	33
																			2785.92	11.4639											1407.84	16.4275		1153.2	32.4					1854.16	31.8464		1454	19
																			2702.32	6.98023											1480.63	59.8734		1154.9	55.2					1854.32	8.42355		1456	60
																			2786.97	9.02946											1502.54	29.4004		1155	34.3					1856.18	87.3822		1457	36
																			964.29	13.614											1503.92	21.9121		1155.5	34.2					1858.56	22.8964		1461	29
																			972.469	13.8649											1510.9	9.49349		1156.6	27.7					1859.61	38.8538		1475	33
																			1065.93	14.1256											1524.78	25.5671		1158.1	37.4					1861.02	25.46		1515	19
																			1041.35	13.8042											1532.93	5.36983		1158.2	46.3					1861.14	9.99541		1526	31
																			1006.72	18.5319											1550.99	61.5157		1160.1	31.2					1861.53	132.331		1529	54
																			1089.79	16.2263											1559.23	12.4935		1165.2	46.4					1861.74	35.4626		1566	28
																			1035	14.2034											1585.83	64.649		1167.6	24.3					1864.83	60.2434		1573	10
																			1122.66	17.4155											1651.09	13.8784		1169.8	37					1870.44	32.7896		1623	44
																			1035.8	17.7456											1653.04	27.835		1172.4	29.9					1875.43	12.6974		1627	43
																			984.054	9.93844											1656.19	13.1003		1173.5	22.6					1883.66	35.9217		1637	83
																			1017.76	11.116											1657.09	11.7967		1174.1	32.1					1886.49	16.6859		1638	15
																			1036.97	35.3697											1662.8	7.71144		1176.1	38.2					1886.86	47.833		1647	19
																			960.654	18.7034											1671.18	12.8078		1178.1	46.3					1887.59	75.4241		1650	28
																			1034.44	20.5537											1685.11	32.9924		1181.7	28.1					1892.54	27.1552		1657	66
																			1097.33	31.332											1694.18	8.79956		1193	23.9					1897.07	29.203		1663	18
																			1008.61	17.3238											1750.58	5.60041		1193.9	26.1					1907.19	23.6311		1664	44
																			1088.75	16.1073											1760	5.87936		1199.4	32.3					1915.12	14.0612		1668	26
																			1036.88	13.0164											1761.99	7.40877		1200.9	25.8					1917.05	45.8799		1670	13
																			1020.44	11.6044											1764.22	15.4504		1206.9	47.2					1923.29	23.4633		1681	10
																			1096.33	16.4112											1773.88	4.94407		1207.4	41					1925.61	68.4466		1685	14
																			1168.23	21.9331											1779.07	9.58532		1208.3	31.3					1936.87	10.7698		1690	15
																			1049.44	15.0909											1804.41	28.8905		1210.5	26.1					1940.15	11.8161		1697	33
																			1083.82	15.5621											1823.12	11.5895		1210.7	32.9					1949.59	19.8662		1709	17
																			1016.8	12.9273											1832.66	6.10988		1212.6	30.3					1954.28	44.2302		1723	16
																			1096.82	17.5847											1840.79	11.1181		1221.6	37.5					1954.56	12.2166		1739	24
																			1057.6	23.9522											2006.65	8.10331		1228.3	35.3					1957.35	13.8448		1743	31
																			1081.53	11.8681											2275.81	12.1041		1230.6	30.1					1962.55	14.173		1747	13
																			1059.09	15.124											2673.85	7.649		1237.5	45.9					1964.25	19.6398		1755	4
																			1052.57	15.1235											2730.19	6.13813		1238.4	59.7					1984.98	10.7397		1763	9
																			1140.69	13.092											2734.75	5.02452		1254	25.4					2005.54	10.2678		1791	18
																			1083.55	15.9438											2747.31	2.81025		1277.7	38.1					2006.74	13.6763		1792	32
																			1120.51	25.3341											2755.93	2.58851		1290.3	50.4					2008.51	10.8737		1823	11
																			1099.07	17.5148											2757.25	3.77156		1300.1	31.4					2024.28	71.5891		1847	18
																			1127.97	8.97601											2779.87	2.76266		1305.5	26.6					2041.61	11.9861		1851	14
																			1066.93	15.3709											2852.75	16.6095		1316.9	45.7					2043.51	26.699		1877	25
																			1078.47	19.2423											920.501	58.0621		1327.1	60.9					2072.69	28.232		1878	10
																			1147.49	16.3673											969.241	48.5955		1327.3	27					2075.97	7.25785		1882	70
																			1069.93	17.6299											998.144	28.4258		1330.8	21.2					2084.9	27.5507		1897	46
																			1144.57	14.2311											999.705	29.3366		1331	34					2085.98	10.9405		1900	7
																			1206.44	45.1554											1011.14	46.6643		1331	26					2088.66	18.5765		1915	9
																			1132.34	14.393											1034.06	29.0094		1332.7	27					2092.61	22.4671		2005	21
																			1142.31	19.446											1050.76	28.6758		1334.6	21.5					2190.47	14.0266		2096	3
																			1157.76	13.9928											1066.25	28.0303		1336.3	33.9					2206.84	18.1213		2180	8
																			1131.15	11.8814											1076.5	23.6916		1349.1	16.4					2219.41	7.13215		2692	13
																			1244.03	14.8268											1089.76	25.9751		1364.6	28.5					2479.08	14.5054		2695	10
																			1199.03	12.9735											1099.12	36.4978		1366.4	32.1					2495.6	8.59983		2705	12
																			1274.5	12.4316											1104.06	51.1418		1379	25.7					2525.53	2.6115		2712	8
																			1196.09	13.7768											1108.02	123.568		1384	24					2554.7	24.0331		2768	9
																			1245.29	13.6383											1108.14	12.9409		1390.4	33.2					2567.99	12.1995		2782	38
																			1353.37	10.0851											1109.97	22.2579		1400.6	30.8					2598.23	5.78832		393	11
																			1176.04	8.71959											1160.82	25.3323		1405.2	31.5					2602.52	5.50019		423	17
																			1255.64	22.1629											1163.68	48.2514		1407	29					2603.41	30.3024		424	12
																			1277.55	16.8115											1182.63	14.9472		1409	33.9					2616.45	6.70674		433	21
																			1256.35	10.089											1201.87	16.6653		1418.9	72.5					2617.3	6.38074		450	26
																			1256.35	10.089											1210.08	12.8233		1427.8	24.1					2626.17	7.42233		461	19
																			1368.17	11.5279											1289.26	25.9523		1430.2	19.5					2655.63	9.97236		464	12
																			1264.22	26.535											1292.22	39.7884		1430.7	25.3					2663.54	10.0293		479	16
																			1265.68	11.8673											1316.99	11.7554		1438.3	25.5					2679.22	10.4014		707	61
																			1375.25	17.2619											1375.45	13.6005		1442.2	33.2					2696.61	11.1126		947	68
																			1279.14	12.3384											1377.3	10.0663		1444.1	16.7					2703.76	9.6569		955	15
																			1312.45	8.02261											1380.21	19.8376		1445.1	21.5					2717.45	7.47601		979	76
																			1343.44	13.1228											1402.1	10.2899		1464	29.2					2732.41	11.9971		982	26
																			1314.7	9.78715											1408.98	29.2156		1466.2	22.6					2762.58	3.94686		982	35
																			1491.68	15.5516											1415.86	34.7357		1479.8	38.9					2777.38	9.43708		984	68
																			1394.4	8.7694											1495.39	4.85146		1482.2	23.5					583	20		996	57
																			1420.56	21.5035											1520.28	14.1903		1488.3	34.8					1077	10		1008	44
																			1422.94	14.4105											1533.46	20.8395		1488.9	22.9					1521	10		1010	25
																			1449.53	7.83376											1617.62	11.7584		1491.4	24.8					1757	20		1012	16
																			1419.54	14.1313											1620.18	27.7133		1492.5	25.7					1818	10		1013	79
																			1473.92	11.5038											1621.25	25.7581		1493.6	47.9					1841	10		1015	51
																			1600.99	13.9124											1623.18	37.1259		1494.7	18.6					1847	10		1017	35
																			1460.84	8.32787											1631.01	10.7696		1497.3	21.1					1868	20		1022	63
																			1591.33	12.3266											1634.47	7.99515		1502.1	17.9					1872	10		1027	41
																			1641.71	10.2256											1641.29	14.7187		1507	22.1					1887	20		1029	58
																			1639.1	16.7841											1641.96	14.1489		1512	20.5					1938	10		1033	79
																			1741.34	11.7702											1642.89	10.2386		1515.6	25.6					1962	40		1033	15
																			1633.44	14.826											1662.32	16.0886		1518.2	20.6					1996	40		1034	28
																			1642.12	8.70097											1687.48	12.4187		1522.9	25.5					2002	10		1040	52
																			1710.23	8.59785											1698.07	8.66131		1532.1	23.2					2004	10		1041	78
																			1555.29	9.1571											1698.47	17.56		1536	28					2298	10		1043	31
																			1658.55	13.2309											1713.68	8.71289		1576.6	36.3					2335	10		1044	33
																			1698.6	10.529											1727.7	27.2515		1598.8	21.3					2665	10		1046	40
																			1656.71	13.1792											1729.57	3.25094		1602.4	34					2673	10		1051	18
																			1594.91	8.42658											1739.32	4.68516		1603	27					2835	40		1061	26
																			1698.16	16.5349											1744.86	10.0683		1613.2	26.4					2884	10		1068	45
																			1729.49	7.79433											1753.9	4.6765		1624.6	32.1								1072	26
																			1693.67	8.22471											1758.04	16.1571		1624.8	23.9								1073	44
																			1631.37	8.58843											1779.22	23.9757		1629.8	23.3								1074	48
																			1738.13	5.12153											1793.28	6.15334		1633	19.8								1075	41
																			1760.12	10.521											1832.57	8.54982		1633.8	21.3								1076	72
																			1945.34	7.60031											1860.58	28.9666		1638.4	22.9								1077	40
																			1794.19	7.34256											2132.91	44.8844		1642.2	23.4								1094	28
																			1750.49	9.20984											2447.06	10.0758		1643.3	22.7								1101	38
																			1878.18	12.5343											2605.17	10.6496		1644.1	31.6								1115	63
																			1825.86	5.38497											2677.55	3.07814		1645.5	30.5								1121	78
																			1875.47	7.72152											2695.02	3.31158		1646	29.1								1129	65
																			1865.76	8.66685											2788.08	2.72312		1647	22.7								1130	28
																			1856.81	8.29008											2911.4	1.79148		1652.8	34.8								1132	39
																			2009.51	11.8053											1018.9	36.4424		1664.6	31								1133	34
																			2554.81	10.1959											1021.05	63.1344		1667.5	37.2								1136	53
																			2660.67	10.2812											1022.71	6.73366		1672	29.7								1146	29
																			2772.38	7.6174											1041.86	8.47402		1679.7	34								1147	19
																			2699.36	7.64258											1055.73	25.6919		1683.1	24.6								1152	25
																			2793.13	8.35922											1058.39	28.6843		1687.9	26.7								1173	25
																			2818.38	6.51642											1058.95	9.20102		1689.9	18.8								1174	51
																			1003.35	15.28											1073.6	21.2292		1691.7	23								1177	46
																			1024.65	12.8844											1087.47	39.4199		1695.9	29.8								1187	41
																			1024.66	17.428											1111.02	10.8406		1700.8	38.8								1202	51
																			1029.99	12.7201											1124.32	15.8602		1700.8	26.3								1203	34
																			1038.78	10.7874											1124.96	32.023		1701.6	33.5								1208	39
																			1051.75	10.0857											1130.63	22.4194		1704.5	29.7								1210	40
																			1058.54	12.081											1131.03	16.226		1707.5	22.8								1210	64
																			1086.14	15.2149											1140.35	10.1002		1714.7	26.8								1211	74
																			1114.61	10.3881											1156.22	27.4205		1717.9	21.5								1217	29
																			1117.57	12.4343											1162.62	16.7417		1724.7	22.1								1223	54
																			1153.61	11.9845											1162.88	28.169		1749.1	19.6								1228	25
																			1164.87	16.9506											1162.96	22.0119		1756	25.9								1236	58
																			1168.15	15.0282											1184.33	12.2486		1760.7	19.7								1251	17
																			1190.87	18.6352											1304.33	27.4512		1771.7	16.1								1270	127
																			1205.62	19.1849											1307.49	23.7899		1779.6	19.4								1272	65
																			1218.19	12.0799											1326.44	16.1686		1780	21.3								1281	15
																			1275.93	12.3756											1354.38	14.9791		1783.4	26.8								1307	48
																			1282.37	12.5057											1382.46	13.9326		1799.7	22.1								1318	72
																			1309.29	16.9299											1404.08	19.0408		1810.2	17.1								1327	23
																			1323.78	20.2607											1404.42	29.731		1812.1	18.2								1378	38
																			1343.16	14.0903											1413.15	16.5257		1815.9	31								1407	63
																			1377.4	12.4538											1447.23	28.4729		1876.6	20.6								1421	62
																			1385.09	12.8465											1486.39	13.9918		1879.2	25.7								1421	26
																			1390.4	10.8165											1491.6	15.4883		1885.5	25.1								1422	54
																			1430.05	8.88427											1492.53	28.9127		1889.4	22.3								1423	50
																			1436.67	10.0411											1499.9	32.6436		1975.1	24.7								1437	13
																			1451.61	9.39416											1585.78	8.31492		1977.2	27.9								1445	27
																			1473.56	12.5884											1600.91	15.9617		2024.6	22.3								1448	22
																			1486.88	10.2396											1613.97	25.4072		2098.1	54.5								1455	28
																			1546.13	15.5134											1621.21	28.7081		2112.6	19.6								1518	32
																			1627.32	12.4412											1627.42	7.38411		2116.1	266.4								1518	56
																			1627.84	12.3464											1632.63	15.3918		2558.7	22.6								1618	9
																			1641.05	10.7261											1655.12	11.977		2594.8	20.8								1637	49
																			1644.47	9.60324											1728.47	17.387		2608.5	26								1649	48
																			1651.04	9.88941											1755.21	12.2754		2611.3	16								1650	21
																			1651.76	10.4177											1758.98	3.95294		2681.1	21.3								1680	10
																			1653.57	9.91711											1776.11	15.2372		2695.6	20.6								1736	12
																			1689.16	11.1096											1782.13	13.0654		2700.5	17.6								1779	17
																			1715.63	8.47655											1814.72	21.2803		2703	23.1								1841	8
																			1761.75	10.4104											1823.69	8.98921		2708.1	19.1								1881	12
																			1775.35	8.97959											1886.39	20.8232		2709.2	16.1								2014	18
																			1784.96	8.6085											1952.82	13.743		2713.9	17.3								2095	10
																			1845.13	9.57933											1969.94	15.4288		2714.5	22.2								2632	12
																			1859.43	9.85281											1992.82	7.74166		2717.2	13.4								2776	9
																			2038.18	14.5613											2569.53	4.04213		2718.3	21.2								2817	11
																			2115.26	38.4847											2711.35	3.02975		2728.4	21.2								309	8
																			2568.6	9.27557											2752.56	6.59635		2742.2	19.6								451	12
																			1069.71	14.671											2847.33	3.77325		2744.9	16.6								461	13
																			1004.31	20.727											2858.48	14.5712		2754.5	22.6								465	11
																			1058.69	14.0591														2773.7	16.8								614	9
																			1071.83	24.2236														2781.3	18.5								630	10
																			1032.72	25.1106														2789.4	15.1								634	10
																			1062.11	31.4462														2790.9	17.9								642	14
																			1025.41	16.5954														2804.7	19.7								774	16
																			1102.69	19.8603														2817.1	30.8								1037	29
																			1004.15	15.44														2836	18.5								1039	36
																			1109.11	22.5086														2943.3	16.2								1048	22
																			1002.31	27.786														2949.6	11.9								1077	14
																			1052.06	14.0851														2966.2	18.4								1084	13
																			1036.72	14.2329																							1089	24
																			989.355	16.8368																							1100	17
																			1018.5	20.6045																							1102	22
																			1069.85	16.5907																							1116	49
																			1121.84	25.131																							1126	31
																			1011.94	26.3671																							1147	10
																			1068.76	14.484																							1159	38
																			1150.56	17.1999																							1162	59
																			1038.46	14.595																							1195	50
																			1078.61	16.6322																							1198	35
																			1031.02	22.6192																							1205	35
																			1042.12	15.986																							1251	48
																			1127.44	24.8504																							1281	57
																			1158.32	27.932																							1344	33
																			1011.1	29.1764																							1370	43
																			1097.31	27.3415																							1414	65
																			1084.21	18.3133																							1420	14
																			1044.97	17.2712																							1428	13
																			1120.8	17.5446																							1440	14
																			1099.11	13.9074																							1443	58
																			1152.68	21.2922																							1446	8
																			1125.68	16.2039																							1453	28
																			1096.97	18.4094																							1464	20
																			1138.45	14.6305																							1627	31
																			1142.89	25.0785																							1628	20
																			1161.23	16.0491																							1636	19
																			1116.62	15.2039																							1638	11
																			1190.3	32.8668																							1642	23
																			1188.91	17.0127																							1644	23
																			1208.7	20.0592																							1645	23
																			1189.86	17.6068																							1665	26
																			1132.06	13.9383																							1675	25
																			1267.02	21.4827																							1675	6
																			1281.54	21.1562																							1676	22
																			1171.62	16.8496																							1678	12
																			1281.54	14.4838																							1680	15
																			1277.22	13.2884																							1684	13
																			1287.56	18.9469																							1688	19
																			1332.92	14.6328																							1704	15
																			1469.14	16.4515																							1717	11
																			1407.38	15.8746																							1719	34
																			1372.17	18.8509																							1721	7
																			1424.73	20.321																							1726	22
																			1386.68	15.687																							1729	11
																			1457.18	14.3383																							1731	17
																			1495.38	14.9293																							1741	31
																			1492.02	14.3405																							1744	19
																			1448.35	14.242																							1751	15
																			1455.38	14.6332																							1752	27
																			1524.55	13.7866																							1764	9
																			1494.06	12.2159																							1768	17
																			1598.83	13.5428																							1775	12
																			1606.23	14.5215																							1788	7
																			1604.94	12.3764																							1815	11
																			1478.92	16.3956																							1820	32
																			1532.04	18.4191																							1908	11
																			1599.45	15.4811																							1941	15
																			1666.37	13.155																							1959	24
																			1630.97	18.2241																							1964	50
																			1646.14	14.4439																							1982	18
																			1688.27	13.061																							1986	18
																			1720.75	12.8541																							1995	14
																			1765.45	13.3833																							2013	23
																			1685.24	12.936																							2063	18
																			1752.93	12.9782																							2223	13
																			2698.44	11.2028																							2569	11
																			2736.17	10.864																							2609	17
																			2710.35	10.3428																							2773	16
																			2737.32	10.4891																							2862	9
																			2779.21	12.433																							2929	9
																			2969.85	10.3181																							3756	5
																			955.833	17.7652
																			1043.37	15.1099
																			991.937	22.5269
																			1039.92	15.3603
																			1046.55	13.882
																			1021.62	10.5208
																			1038.92	12.4545
																			1099.86	16.8384
																			1092.05	12.6618
																			1025.48	27.5271
																			1066.31	14.0874
																			1045.21	16.0155
																			1085.86	15.2256
																			1020.64	10.5904
																			1057.26	15.2351
																			1163.01	62.5921
																			1080.98	21.0378
																			1013.89	17.7
																			1025.1	13.8131
																			1044.82	24.8287
																			1105.79	14.887
																			1140.48	13.4214
																			1146.66	6.53434
																			1081.03	18.8088
																			1093.36	12.9372
																			1179.17	22.6797
																			1095.31	13.9668
																			1169.64	17.4627
																			1137.16	12.4307
																			1119.05	11.6411
																			1108.12	14.5055
																			1163.82	12.5067
																			1200.45	17.9323
																			1062.77	17.5328
																			1130.83	14.2958
																			1201.09	7.86197
																			1220.59	22.0689
																			1235.07	13.2289
																			1234.06	10.5088
																			1270.98	24.7
																			1194.45	12.9703
																			1243.09	12.6212
																			1315.42	11.5112
																			1262.31	30.89
																			1194.19	18.3408
																			1257.47	10.6525
																			1343.41	12.6333
																			1308.95	10.9433
																			1454.44	11.4769
																			1323.58	11.0782
																			1286.17	11.9868
																			1372.67	11.6986
																			1479.09	12.4393
																			1508.54	9.31178
																			1518.75	10.7881
																			1483.39	5.94383
																			1619.12	10.9495
																			1642.21	15.4768
																			1615.41	6.93913
																			1735.68	11.5493
																			1654.23	16.9686
																			1642.59	10.2308
																			1782.77	10.759
																			1769.65	6.79372
																			1854.26	10.5901
																			1656.8	12.4301
																			1800.18	9.28769
																			1676.97	10.5771
																			1789.23	7.51452
																			1792.07	6.97127
																			1791.41	9.86645
																			1963.78	8.72796
																			1980.98	14.1539
																			1999.84	8.20796
																			2304.15	6.62012
																			2465.58	10.1329
																			2497.32	15.0675
																			2826.49	9.09625
																			3036.18	6.16822
																			987.406	16.1969
																			1071.23	28.6371
																			1019.25	15.5098
																			1016.26	19.7182
																			1070.8	22.3785
																			1043.54	16.2845
																			1058.02	15.254
																			1049.63	14.8086
																			1032.9	16.0298
																			1054.15	14.2883
																			1081.78	16.7176
																			1022.02	20.6964
																			1058.57	14.6102
																			1052.42	12.4303
																			1090.93	19.0667
																			1082.59	26.4337
																			1124.61	18.4874
																			1057.1	16.0435
																			1123.23	18.1473
																			1133.17	13.2276
																			1073.15	14.0373
																			1091.39	18.8672
																			1135.57	14.4027
																			1069.68	13.2803
																			1066.34	16.2359
																			1086.06	16.1654
																			1068.57	17.5231
																			1092.84	25.1271
																			1105.13	27.7055
																			1140.74	13.2565
																			1190.17	32.7522
																			1204.76	16.8804
																			1183.28	18.9877
																			1173.06	19.99
																			1144.25	15.9427
																			1086.13	14.3622
																			1137.37	15.2811
																			1185.91	18.7178
																			1100.07	29.5298
																			1202.27	19.5991
																			1237.11	28.9402
																			1164.19	14.7078
																			1087.98	21.3004
																			1241.34	18.5883
																			1214.66	18.061
																			1191.66	20.0886
																			1260.48	18.709
																			1313.52	22.5945
																			1398.79	20.5211
																			1364.84	16.7823
																			1312.86	16.1436
																			1410.92	13.7528
																			1354.41	13.9929
																			1384.73	13.298
																			1519.48	13.5339
																			1493.78	14.6788
																			1502.72	13.7445
																			1517.68	15.5476
																			1425.17	17.1239
																			1491.87	15.949
																			1640.83	14.4414
																			1470.51	13.9643
																			1505.62	17.4952
																			1453.86	10.7178
																			1517.29	12.18
																			1494.62	12.7581
																			1641.64	10.3461
																			1594.53	15.4634
																			1500.37	12.9883
																			1659.24	28.5198
																			1570.07	14.0651
																			1642.21	18.1396
																			1660.48	12.988
																			1687.9	14.2171
																			1616.43	9.88638
																			1619.2	15.5636
																			1636.44	12.8705
																			1642.19	13.1618
																			1633.14	13.8209
																			1664.82	17.7149
																			1655.66	12.3757
																			1645.24	10.3815
																			1727.44	13.2969
																			1883.09	12.7513
																			1745.17	12.1182
																			1874.08	11.6097
																			1851	11.7114
																			1836.82	12.2404
																			1803.26	18.6553
																			1859.37	12.7582
																			1873.31	13.7983
																			2479.28	11.2886
																			2618.45	11.3784
																			2708.2	11.1047
																			2687.32	11.4971
																			2750.16	14.1982
																			2729.76	15.0892
																			2779.7	10.5982
																			2827.01	11.2012
[truncated: 23 more columns]

## Sheet: Pennsylvanian
	For generating pie diagrams
	Inferred source	lower limit	upper limit		age ref
	1. Appalachian plutons	0	480		Park, H., Barbeau, D.L., Rickenbaker, A., Bachmann-Krug, D., and Gehrels, G., 2009, Application of Foreland Basin Detrital-Zircon Geochronology to the Reconstruction of the Southern and Central Appalachian Orogen, Journal of Geology, v. 118, p. 23-44.
	2. Suwanee/Meguma	540	700		Park, H., Barbeau, D.L., Rickenbaker, A., Bachmann-Krug, D., and Gehrels, G., 2009, Application of Foreland Basin Detrital-Zircon Geochronology to the Reconstruction of the Southern and Central Appalachian Orogen, Journal of Geology, v. 118, p. 23-44.
	3. Grenville crust	950	1300		Whitmeyer, S.J., and Karlstrom, K.E., 2007, Tectonic model for the Proterozoic growth of North America. Geosphere, v. 3, p. 220-259.
	4. OK-CO Aulacogen	530	540		Hanson, R. E., Puckett, R. E, Jr., Keller, G. R., Brueseke, M. E., Bulen, C. L., Mertzman, S. A., Finegan, S. A., & McCleery, D. A.,2013, Intraplate magmatism related to opening of the southern Iapetus Ocean: Cambrian Wichita igneous province in the Southern Oklahoma rift zone. Lithos, 174, 57-70.
	5. Granite/Rhyolite	1300	1500		Whitmeyer, S.J., and Karlstrom, K.E., 2007, Tectonic model for the Proterozoic growth of North America. Geosphere, v. 3, p. 220-259.
	6. Yavapai/Mazatzal	1600	1800		Whitmeyer, S.J., and Karlstrom, K.E., 2007, Tectonic model for the Proterozoic growth of North America. Geosphere, v. 3, p. 220-259.
	7. 1.8-2.0 Ga	1800	2000		Whitmeyer, S.J., and Karlstrom, K.E., 2007, Tectonic model for the Proterozoic growth of North America. Geosphere, v. 3, p. 220-259.
	8. Archean craton	2500	4000		Whitmeyer, S.J., and Karlstrom, K.E., 2007, Tectonic model for the Proterozoic growth of North America. Geosphere, v. 3, p. 220-259.
	5. Midcontinent rift	1096	1107	Paces and Miller (1993)
	Chapman and Laskowski (2018 - this study)																		Kissock (2016); Kissock et al. (2017)						Thomas et al. (2004)			Gray and Zeitler (1997); Becker et al. (2005)			Thomas et al. (2017)															Dodson (2008)			Eriksson et al. (2004)
	Plate 4B sample #1	Upper Pennsylvanian Moberly Ss. (15MO1 - 15S, 533851E, 4360992N)		Plate 4B sample #2	Upper Pennsylvanian Warrensburg Ss. (15MO2 - 15S, 434292E,4291426N)		Plate 4B sample #3	Lower Pennsylvanian Kearny Fm. (MESA-PET Seacat 5-19 well; 14S, 443295E, 4131896N)		Plate 4B sample #37	Pennsylvanian Amsden Fm. (10DM14 - UTM 12N 485883E, 4966973N)		Plate 4B sample #38	Pennsylvanian Quadrant Fm. (10DM15 - NAD83 12N 485717E, 4966991N)		Plate 4B sample #48	Pennsylvanian Minnelusa Sandstone		Plate 4B sample #4	Pennsylvanian Forest City Basin combined		Plate 4B sample #5	Illinois Basin combined (Data missing from Appendix C?)		Plate 4B sample #6	Pennsylvanian Sewanee Conglomerate and Cross Mountain Fm. combined		Plate 4B sample #7	Pennsylvanian Pottsville Fm. (P - GS97); Tumbling Run Member (1 - B05)		Plate 4B sample #8	Lower Pennsylvanian KY-18-CB Corbin		Plate 4B sample #9	Lower Pennsylvanian OH-1-SS Sharon south		Plate 4B sample #10	Lower Pennsylvanian OH-1-SN Sharon north		Plate 4B sample #11	Middle Pennsylvanian VA-1-GN Grundy		Plate 4B sample #12	Middle Pennsylvanian KY-19-PR7 Princess		Plate 4B sample #13	Upper Pennsylvanian Monongahela+Conemaugh combined		Plate 4B sample #14
Source	Frequency	Relative Frequency		Frequency	Relative Frequency		Frequency	Relative Frequency		Frequency	Relative Frequency		Frequency	Relative Frequency		Frequency	Relative Frequency		Frequency	Relative Frequency		Frequency	Relative Frequency		Frequency	Relative Frequency		Frequency	Relative Frequency		Frequency	Relative Frequency		Frequency	Relative Frequency		Frequency	Relative Frequency		Frequency	Relative Frequency		Frequency	Relative Frequency		Frequency	Relative Frequency		Frequency
1	11	0.126437		13	0.101562		6	0.0759494		7	0.112903		6	0.0952381		5	0.0609756		203	0.15037		130	0.172414		18	0.246575		23	0.365079		24	0.08		37	0.224242		54	0.175896		11	0.0413534		15	0.0549451		53	0.156342		3
2	10	0.114943		4	0.03125		1	0.0126582		3	0.0483871		0	0		3	0.0365854		119	0.0881481		92	0.122016		0	0		4	0.0634921		3	0.01		12	0.0727273		9	0.029316		6	0.0225564		10	0.03663		4	0.0117994		2
3	51	0.586207		73	0.570312		42	0.531646		9	0.145161		14	0.222222		19	0.231707		509	0.377037		377	0.5		32	0.438356		23	0.365079		143	0.476667		82	0.49697		187	0.609121		188	0.706767		187	0.684982		239	0.705015		99
4	0	0		2	0.015625		0	0		1	0.016129		0	0		0	0		11	0.00814815		4	0.00530504		0	0		0	0		0	0		0	0		1	0.00325733		1	0.0037594		0	0		0	0		0
5	5	0.0574713		17	0.132812		12	0.151899		8	0.129032		6	0.0952381		9	0.109756		237	0.175556		41	0.0543767		6	0.0821918		8	0.126984		39	0.13		19	0.115152		29	0.0944625		50	0.18797		47	0.172161		37	0.109145		16
6	5	0.0574713		8	0.0625		7	0.0886076		15	0.241935		10	0.15873		29	0.353659		130	0.0962963		43	0.0570292		9	0.123288		3	0.047619		51	0.17		10	0.0606061		15	0.0488599		6	0.0225564		9	0.032967		3	0.00884956		8
7	2	0.0229885		5	0.0390625		8	0.101266		8	0.129032		17	0.269841		12	0.146341		52	0.0385185		25	0.0331565		2	0.0273973		1	0.015873		12	0.04		4	0.0242424		6	0.019544		1	0.0037594		1	0.003663		1	0.00294985		4
8	3	0.0344828		6	0.046875		3	0.0379747		11	0.177419		10	0.15873		5	0.0609756		89	0.0659259		42	0.0557029		6	0.0821918		1	0.015873		28	0.0933333		1	0.00606061		6	0.019544		3	0.0112782		4	0.014652		2	0.00589971		10
sum	87			128			79			62			63			82			1350			754			73			63			300			165			307			266			273			339			142
%grains not considered	5.43478			8.57143			4.81928			19.4805			13.6986			12.766			32.1949			7.48466			6.41026			12.5			5.95611			9.83607			3.76176			2.91971			3.87324			2.58621			5.96026
	U-Pb age	1s error		U-Pb age	1s error		U-Pb age	1s error		U-Pb age	1s error		U-Pb age	1s error		U-Pb age	1s error		U-Pb age	1s error		U-Pb age	1s error		U-Pb age	1s error		U-Pb age	1s error		U-Pb age	1s error		U-Pb age	1s error		U-Pb age	1s error		U-Pb age	1s error		U-Pb age	1s error		U-Pb age	1s error		U-Pb age
	309.101	12.1216		301.144	9.32475		386.88	3.81743		2728.75	4.36366		508.884	20.5903		1650.61	16.6684		417	7.5		355	4.7		384.8	4.4		588	17		406.2	6.8		330	15.8		361.5	4.3		322.4	4.3		374.7	9.3		188.4	7.6		939.5
	317.737	8.12737		321.804	12.8149		424.051	3.84468		412.826	5.46354		1097.48	41.4734		413.646	3.27537		418	4.3		357	5.6		396.8	4.8		962	32		406.6	8		336	14.1		390.2	5.3		359.5	5.4		384.5	11.7		314.5	14.3		1168.2
	375.074	9.19256		339.026	9.99769		436.215	3.87223		1792.95	51.9189		1495.09	38.1174		2301.25	37.6456		419	4.6		359	3.7		405.2	5.1		542	12		406.8	10.7		380.9	7.4		394.6	7.8		367.6	6.5		385.4	10.1		337.9	11.6		2756.1
	378.285	6.7962		381.884	13.5116		439.808	8.44538		531.934	11.5024		2747.76	6.7969		1124.99	13.5828		420	5.4		363	4.5		414.5	5		936	117		409	4.7		393.3	3.4		395.2	5.9		370.3	3.8		393.2	14.2		347.7	15		1211.2
	381.255	9.44094		390.6	9.49282		463.75	2.85243		540.321	25.5639		2843.12	34.6132		2817.88	7.64606		438	6.6		368	4.4		435.4	10.4		1667	25		423.9	11		393.3	2.9		398.5	6.4		391.3	10.7		393.5	9.2		349	9.9		1174.5
	383.94	14.3372		396.763	12.3831		468.242	4.31978		610.428	11.8792		1660.8	60.3559		1068.45	25.4708		447	5.2		374	4.5		445.3	5.2		1658	28		429	4.8		401.4	9.2		399.5	7.8		411.3	10.4		412.6	7.6		350.6	7.4		1101.8
	387.442	21.4791		404.939	7.91729		563.653	12.3074		355.197	6.12887		1142.06	61.4491		3375.49	11.2938		463	7.2		376	4.9		455.1	5.9		1085	130		429.1	3.8		420.3	11.1		399.6	6.7		412.5	4.1		413.6	9.5		356.1	8.1		1163.4
	393.954	15.4049		412.467	7.29072		887.685	17.3483		1625.73	16.6667		1992.41	22.2458		1062.83	12.6683		547	8.9		376	4.3		459.6	8.1		1073	23		429.7	6.5		423.1	2.9		401.7	6.6		422.6	4.1		415.7	30.6		360.1	9.6		1170.3
	401.756	7.92745		418.728	14.3434		943.514	101.042		1274.47	19.2282		1844.6	39.8833		1448.84	18.5811		599	8.4		377	5.3		462.9	4.7		427	9		430.5	19.4		431.2	17.3		401.7	8.7		447.3	5.2		417	16.7		379	16.7		1152.5
	443.498	10.4442		421.821	14.943		969.33	64.7149		1704.44	15.7903		2422.79	14.3661		1023.92	72.9747		617	9.2		380	6.7		968.9	59.9		2080	30		430.7	10.8		439.9	9.7		402.7	7.2		449.8	7.3		418.1	10.4		391.2	8.1		1239
	451.665	11.5257		423.39	25.1152		979.909	12.7545		1566.06	12.5523		1970.11	6.94912		434.83	5.23931		920	24.9		387	5.3		985.7	16.2		1405	26		445.2	5.6		452.8	4.3		403.3	9.7		462.1	6.6		419	19.5		392.2	8.4		1019
	509.506	11.3317		458.048	19.4593		991.053	64.3472		1646.45	13.1345		1091.8	23.3893		1862.22	8.09243		939	30.7		390	5		1008.1	27.8		412	9		446.6	10.2		456	10.1		406.1	7.4		517.2	15.5		430.4	12		393.8	10		993.9
	546.221	13.8289		458.373	19.7397		1011.99	22.3453		2620.92	5.19885		1502.33	10.668		1122.55	18.5782		957	28.7		390	4.9		1014.7	11.5		1166	21		447.8	7		456.1	4.3		407	6.4		535.9	16.6		448.7	18		395.8	6.5		1363.4
	553.278	10.2111		481.269	15.3208		1014.37	152.311		1515.37	22.1227		1737.27	14.8634		1160.5	76.088		966	17		391	6.4		1027.2	14.6		1505	24		452.6	4.2		457.3	6.4		408.1	23.4		566	11.5		468.2	10.8		398	12.2		1037.2
	553.741	18.9911		535.484	17.3251		1014.55	24.2014		1512.39	22.1785		1760.79	11.2028		1799.28	9.21336		975	19.3		393	4.6		1029.7	22.5		941	42		453.6	4.7		458.3	5.4		409.4	11.3		572.7	14.2		470.5	10.3		405	5.9		1326.6
	554.065	13.7753		539.001	10.7517		1017.51	15.133		1255.67	8.6576		1514.97	29.9812		964.223	12.8635		977	61.3		396	6.7		1059.1	18.8		639	14		453.8	5.6		458.9	4.3		417.8	4.2		586	16.2		551.5	11.1		405.5	10		1296
	559.038	12.8281		570.865	16.0597		1019	23.8453		2050.31	11.5443		1035.54	23.7705		1839.92	6.84709		978	35.5		400	4.2		1030.8	14.2		427	10		457.6	5.3		458.9	5.3		419.2	5.2		611.2	13.3		571.9	14.9		414	7.9		981.1
	559.347	11.9629		574.439	16.4301		1027.09	51.6458		1777	22.7765		1056.38	139.118		1983.91	8.20931		979	30.9		404	3.8		1064.6	6.1		1768	26		461	4.9		459.5	8.2		419.3	6		612.6	8.6		610	24.3		419.5	11.8		1198
	579.797	31.0349		584.778	13.2076		1029.81	21.4865		1499.41	26.7443		1958.49	6.4414		1264.59	65.6001		985	53.3		408	5.1		1083.6	17.6		1066	20		461.5	5.2		461.3	4.7		422.9	7.4		625	10.4		617.4	10.8		427.9	15.6		1334
	590.651	18.2804		648.93	17.4037		1034.8	29.5153		2987.78	4.60096		1618.14	21.7406		270.044	7.55663		987	23.3		410	5.6		1085.2	24.4		393	11		462.1	5.6		463.2	7.7		425.4	8.2		934.9	7.3		627.6	15.1		436.7	13.3		985.3
	597.108	16.9251		720.445	17.8308		1039.8	83.5489		1069.74	10.5554		428.743	8.36115		614.445	7.20739		996	18.5		415	4.6		1094.5	14		419	13		468.1	4.6		464.4	8.1		432.3	7.7		938.5	27.9		630.1	23.9		441.8	10.5		1503.2
	608.163	20.5415		916.116	38.2141		1043.43	120.726		504.323	13.3276		2544.45	10.1332		1497.23	16.6108		997	30.5		417	5.5		1105	43.5		458	31		468.4	5.8		465.2	8.4		435.2	12.2		941.6	75.9		641.7	16.2		455.4	6.5		1171.3
	715.553	13.4327		923.407	49.375		1047.51	38.2583		1635.23	10.5549		1195.46	39.2913		1683.28	5.41694		997	24.9		419	3.7		1144.3	4.4		1065	20		472.2	4.2		466.7	3		436.3	9.3		949.5	29.7		646.3	33.9		458.1	11.3		1170.7
	915.081	42.4164		929.424	59.9168		1051.54	10.3315		1676.19	17.8696		719.84	57.1845		1645.2	6.13457		1001	35.3		419	5.8		1130.6	14.4		1020	18		478.6	6.8		467.3	8.7		436.6	6.3		969.7	49.9		650.8	20.3		610.2	6.7		1283.9
	986.875	31.0529		939.701	63.5474		1053.98	56.9847		1948.7	15.9118		1807.61	21.6826		1458.04	11.4846		1003	30.2		422	3.8		1175.6	15.3		457	10		480.8	9.1		467.3	9.8		437.1	10		990.9	74.3		661.8	14.3		982.8	97.9		1169.5
	988.51	36.3816		955.794	35.8537		1064.4	112.146		2399	7.25926		1873.71	7.39528		372.009	7.06189		1003	58.5		423	5.7		1214.1	52.1		1159	23		485.3	8.9		468	7.6		438.4	7.7		993.6	14.9		901.3	34.5		1132.7	20		1925.9
	997.6	30.3182		956.058	61.4706		1071.23	40.5621		1344.5	8.10431		391.129	40.9785		1794.92	3.00035		1003	27.1		424	5.3		1232.9	31.7		1380	23		488.3	7.2		469.8	12		438.5	7.1		994.1	47.7		927.5	42		975.3	34.6		999.5
	1000.36	26.8022		961.088	31.6286		1072.24	41.6822		1047.43	17.9431		1620.06	33.3152		1974.97	2.0632		1007	49.6		424	5.7		1258.2	17.6		437	11		499.2	14.5		472.9	7.7		438.7	13.6		995.7	43		943.5	30.2		1147.1	71.6		1343.4
	1003.49	41.1154		963.92	94.7612		1073.2	44.8991		404.021	8.57601		1967.49	40.6177		1157.44	52.8172		1012	26		425	5.2		1312.8	14		1582	24		609.3	5.3		473.4	9		439.4	5.1		1003	40.3		948.9	42.4		1105.8	65.3		1455.4
	1009.24	31.0469		982.472	35.4044		1079.93	133.485		1350.63	28.0467		1116.49	71.4317		1934.79	7.14979		1012	29.2		427	4.1		1315	9.4		1204	40		611.4	15.7		474.2	9.6		440.7	5.8		1011.2	9.5		949.7	33.6		1050.6	90.3		1139.7
	1010.86	35.0865		997.504	48.4342		1087.41	27.6802		1645.98	23.8505		1087.49	26.2025		1641.49	34.3457		1015	30.2		427	5.9		1510.8	4.2		218	13		685.4	11.5		474.3	16		441.8	6.9		1011.9	23.2		963.5	35.1		1002.8	44.7		1106.2
	1012.56	45.3046		998.252	55.1506		1099.46	35.6481		1663.08	10.5194		1451.46	30.231		1537.84	6.5166		1015	44.7		428	6.7		1600.7	8.8		988	18		766.7	12.6		474.6	4.9		441.9	8.9		1011.9	99.7		969.8	35.2		1222.6	110		1184.1
	1017.65	48.1768		1013.07	35.6238		1108.44	36.6248		443.152	13.3428		1296.85	78.1151		1642.38	10.109		1017	31.8		428	4.6		1740.9	6.9		948	17		822.4	14.3		475.5	9		442.4	8.4		1014.1	58.2		970.1	39.1		1052	32.9		1096.8
	1018.87	27.5565		1014.01	48.0625		1110.16	70.6544		1506.54	13.3075		2021.49	22.5715		1706.49	3.63438		1018	37.6		429	5.3		1778.3	7.6		1103	19		924.3	49.5		475.7	10.5		443.4	7.1		1014.8	57.4		970.8	21.4		1051.3	38.8		1062.4
	1023.8	26.9568		1019.38	35.3121		1114.67	94.8444		2689.31	14.1235		1778.93	39.5669		1404.89	27.0935		1019	30.8		439	5.2		1783.1	18.2		502	14		930	79.3		478	8		443.8	5.9		1019.5	15.2		977	38.2		1110.2	41.4		1175.2
	1024.38	30.5987		1019.83	39.5506		1125.01	61.5394		1874.76	10.8926		1501.65	8.54045		1126.85	26.9572		1020	25		458	7.5		1816.4	20.7		1062	19		946.5	59.6		478.8	13.3		444.1	8.1		1021.7	13.3		983.9	46.9		1175.3	61.6		1331.5
	1026.42	35.408		1021.3	43.6879		1126.19	30.6513		2856.71	8.35928		395.485	7.63365		1079.71	35.5066		1021	38.1		458	5.7		1817.1	2.9		1281	23		949.3	45.1		480	7.1		444.8	10.8		1022.7	41		987.4	19.8		1037.6	41.7		1194.1
	1026.59	54.6599		1022.13	36.8051		1127.81	106.655		1509.66	19.2729		2773.35	5.9852		1722.06	6.56515		1024	26.5		459	7.1		2121.9	10.7		379	20		967.3	121.3		482.7	15		446.3	6		1025.9	81.4		989.5	29.7		1069.6	42.6		1185.2
	1033.33	42.733		1024.79	30.5069		1127.9	162.814		345.509	10.9704		3314.22	13.9992		642.587	5.2381		1024	48.9		459	5.3		2689.9	8.2		404	10		969.1	30.6		483.3	15.7		450.2	6.6		1026.1	40.9		991.4	36.4		1030.7	21.8		1220.1
	1034.37	37.8645		1028.84	38.0717		1129.66	47.754		1530.96	14.9313		1835.87	40.486		1800.84	8.36587		1027	42.7		460	6.2		2712	49.3		1173	19		972.9	45.5		501.8	10.3		450.3	7.5		1026.9	22.5		992.5	28.8		1107	89		1097
	1034.46	34.5813		1033.06	64.351		1135.88	16.484		1187.41	12.7208		432.959	11.2828		1639.43	8.90875		1029	38.2		463	4.7		2753.5	8.7		1326	25		974.3	16.1		554.7	8.9		452.4	11.6		1027.1	47.5		995.6	33.2		1094.5	38.1		1066.2
	1036.33	34.7962		1035.93	55.7328		1140.21	85.4144		1930.19	12.7183		1413.39	61.048		1761.41	34.639		1030	25.9		471	5		366	5		1851	27		977.6	51.4		556.3	10.2		453.5	6.4		1027.8	41.2		995.9	33.5		1281.7	67.1		1020.8
	1037.06	48.2545		1037.16	48.0248		1149.84	25.5859		548.235	75.3548		1904.2	14.4938		2425.38	9.16667		1031	23.3		482	6.3		384.3	4.7		393	9		983.1	33.6		582.9	23.7		454.4	6.7		1028.2	93.6		999.8	32		1109.5	42.6		1010.9
	1038.34	24.7413		1038.55	31.8029		1154.34	77.266		1219.46	10.9936		1772.9	12.9548		1798.23	14.0118		1031	29.1		484	6		394.8	9.6		1119	21		987.5	43		585.1	8.6		458.2	5.4		1028.7	32.9		1001.4	35.1		1021.2	21.9		1002
	1041.79	33.4659		1038.81	45.1607		1154.42	12.3393		485.908	21.3244		1810.15	76.7993		1508.23	12.7961		1032	58.8		541	5.2		403.9	4		1023	59		988.4	39.9		601.2	11.9		458.4	6.9		1028.8	10		1001.5	34		1047.3	27.7		1261.9
	1042.97	43.307		1039.12	45.2586		1156.15	17.9267		2370.03	4.45769		2998.18	3.79287		1622.37	15.153		1034	33.2		569	7		413.3	5.5		217	9		998.5	57.7		608.5	8		459.3	6		1030.8	185.3		1004.1	28.9		1247.7	86		1085.3
	1050.83	44.0295		1039.52	44.4952		1169.85	45.8424		2175.17	4.83789		1989.22	16.2461		895.706	29.0909		1035	27.9		571	9.4		413.8	4.8		389	4.3		999.5	103.8		615.1	5.5		461.6	12.4		1031.2	26.5		1004.4	42.4		1120.7	38.8		1120.1
	1058.42	30.8653		1046.05	39.0751		1179.31	41.1206		2344.93	5.95889		1858.93	5.20816		1786.67	13.3546		1036	29.1		597	8.9		421	8.4		407.5	5		1008.1	11.1		625.8	14.5		462.9	8.9		1031.6	30.4		1007.7	42.6		1101.6	31.2		1076.8
	1059.49	32.7228		1047.34	35.5103		1196.71	72.8037		1547.13	11.3374		3511.59	4.3312		1736.96	14.6945		1037	26.5		603	6.6		428	5.3		415.6	6		1010.4	37		627.9	27		463.5	6.4		1031.9	21.9		1011.4	19.2		1073.9	23.4		1040.2
	1060.45	51.0894		1049.18	32.4981		1259.2	46.2641		1432.06	41.8972		1229.88	36.0932		1552.63	8.07558		1039	35.9		624	7.7		472.3	5.2		418.6	2.4		1011.7	23.1		641.4	11.3		464	5.8		1032.7	17.1		1013.3	37.5		1115.3	25.1		1155.9
	1062.74	39.4759		1053.62	32.1038		1274.04	193.907		1933.76	4.05294		1305.48	33.584		621.077	5.44656		1040	28.9		783	8		769.5	7.7		420.6	4.3		1012	25.6		643.6	24		465.4	7.7		1033.1	15.1		1015.7	44.6		1222	44.8		1032.7
	1063.22	28.2903		1062.97	27.9292		1328.11	63.882		416.232	9.27072		1074.67	60.6136		2786.08	9.74048		1040	20.6		936	38.3		888.8	23.1		421	4.4		1012.4	38		657.6	10.2		468.2	8.9		1033.3	18.9		1016.2	46.7		1083	22		1774
	1067.77	41.485		1063.57	36.3727		1332.61	38.2749		1436.69	69.1352		1013.2	22.6269		1062.24	13.3526		1042	30		948	20.3		1013.1	10.4		428.8	4.5		1012.4	18.8		710.6	14.5		470.1	15.8		1036.6	17.6		1019.7	41.1		1079.3	23.2		1169.3
	1068.95	30.3943		1066.81	48.3722		1337.57	84.0406		1907.54	7.37009		1394.95	31.3211		2789.16	5.18866		1043	28.3		962	32.6		1023	51.5		431.2	3.1		1014.2	71.2		894.9	11.6		477.6	8.3		1036.6	11.4		1023.2	34.3		1083.5	24.1		1142.3
	1070.3	32.9902		1070.62	52.4754		1343.11	26.6091		2792.07	3.30906		1053.9	20.9234		1756.54	5.62994		1045	37.9		965	23.8		1026.7	24.3		440.6	4.6		1015.2	15.5		921.7	11.4		487	6.6		1036.8	35.1		1025.1	30.7		1226.1	33.7		1067.7
	1072.05	47.8258		1074.64	27.1643		1369.33	9.79839		1942.13	7.3231		2708.14	7.37838		1849.31	6.93786		1045	21.9		979	55.5		1028.5	25.1		475.8	4		1017	21.4		937	16.2		491.8	11.3		1036.9	18.1		1025.4	23.4		1086.5	32.7		1027.3
	1073.55	21.9779		1075.01	48.7774		1379.82	7.58424		1628.05	18.7118		1106.36	74.9139		1930.17	4.52562		1045	41.5		987	25.9		1034.5	19.6		521.7	7.8		1018.8	84.5		940.1	18.4		538.3	8.9		1037.7	36.3		1025.5	24.4		1079.6	30.2		976.8
	1074.35	44.477		1079.76	32.6657		1392.85	83.5351		1784.32	7.31243		480.947	35.5081		1803.59	5.10917		1046	25		992	38.5		1035.1	27.4		555	8.1		1021.6	24.1		940.7	16.7		579.8	9.5		1037.9	12.4		1026.3	34.5		1127.5	40.5		1090.6
	1079.47	36.6474		1087.54	44.9414		1430.56	35.5853		989.557	17.2659		1772.04	7.67581		1626.41	11.0448		1046	37.5		992	32.6		1040.4	13		1067.9	15		1022	43.6		950.4	10.6		608.8	8.9		1039	53		1027.1	47		1119.4	22.2		1220.3
	1082.44	33.4483		1097.89	48.982		1478.44	23.3275		2646.7	25.9665		1885.72	14.3685		1053.27	47.8985		1046	40.9		994	23.7		1055.5	6.2		1058	46.2		1023	46.9		952.6	11.4		615	6.6		1039.1	11.4		1027.7	57.6		1208.2	64		1117.6
	1127.62	40.7038		1114.07	26.4923		1490.62	14.5399		1663.37	15.0719		2826.49	6.14272		1456.64	10.2508		1046	33.9		997	23.4		1067.5	12.2		1105.2	4.6		1024.3	33.9		963.7	14.3		618.4	8.6		1039.3	15		1028.5	38.6		1097.9	49.1		1039.3
	1129.29	22.6456		1122.98	32.5151		1494.57	13.8733		1847.26	9.90401		1817.57	19.4346		1649.28	3.75057		1047	34.7		1004	34.7		1075.5	14.3		853.5	89.5		1025.4	40.4		965.2	15.1		621.4	12.6		1039.3	19.3		1028.9	23.6		1082.9	73.6		1372.4
	1130.64	45.2379		1127.51	50.4261		1497.24	15.4894		2684.43	4.85085		1868.85	25.2185		1051.77	32.2972		1048	68		1006	49.3		1099	22.2		1200.8	4.4		1030.2	69.5		970.9	22.8		633.2	9		1041.1	33.1		1029.1	39.7		1154.9	29		1051.7
	1146.9	39.5728		1127.71	34.2201		1509.75	14.7004		1636.18	13.1145		1914.54	12.898		1449.79	7.37007		1048	28.2		1009	27		1154.4	15.6		1071.6	25.8		1032.2	35.3		973.1	17.3		648.6	9.6		1042.2	12.9		1031.2	37.4		1159.9	28.6		1195
	1154.74	32.6947		1130.35	42.2256		1540.34	13.4911		1460.28	6.82814		1797.91	57.7929		1509.95	13.459		1049	35		1009	31.5		1217	24.2		1271.2	24.3		1033.2	30.9		980.1	17.2		664	25.6		1045.4	36		1034.4	42.1		1156.7	55.3		1021.5
	1156.53	55.267		1130.48	35.6308		1609.47	36.941		2540.03	4.81541		508.898	25.7837		1905.12	9.65888		1049	30.8		1011	27.2		1342.7	20.3		1240.2	22.5		1033.5	9.4		992	12.3		682.5	16		1046.7	9.9		1035	30.6		1150.4	51.5		999.7
	1158.11	30.0464		1138.76	60.6173		1622.45	43.4141		1805.86	5.09729		1582.57	155.089		1313.56	131.582		1050	26.8		1014	20.3		1362.8	35.2		1413.6	13.5		1034.5	30.6		992.2	63.1		777.4	15.4		1048	96.3		1037.7	57.4		1204.4	36.2		1149.8
	1182.16	33.8013		1140.35	42.2393		1661.74	16.7644		1251.03	19.1944		420.155	14.1114		1443.89	12.0067		1050	19.1		1014	21.9		1376.4	17.4		1389.1	9.6		1035.9	12.3		996.4	20.3		894.6	22.9		1048.2	37.4		1042.9	35.9		1171.6	32		990.4
	1185.35	39.4466		1148.11	38.953		1701.26	19.8397		2983.54	4.73564		444.954	23.5047		1531.58	35.3717		1051	27.7		1023	31.8		1451.2	24.5		1498.1	8.7		1036.7	11.8		1003.1	11.1		917.6	40.2		1049	12		1043.1	32.7		1148.1	31.7		1190.5
	1188.07	43.4336		1149.64	36.2442		1740.75	28.3776		431.704	4.03952		1911.58	27.5718		1624.7	6.97554		1051	54.7		1024	61.2		1567	5.5		1494.7	33.2		1037.6	108.4		1003.1	12.2		931.4	30.5		1050.3	29.9		1043.3	67.1		1194.3	41		1048.6
	1206.71	19.6452		1152.21	71.3055		1758.49	5.66282		1688.99	6.16422		1624.56	5.51793		1638.31	6.33006		1052	50.6		1027	21.5		1664	24.1		1470.7	10.2		1038.1	37.1		1004.4	10.2		941.9	33.6		1054.1	36.8		1049.4	30.4		1221.5	20.2		1244.3
	1216.13	28.9061		1153.17	27.3975		1795.06	28.5051		2792.64	5.76352		2728.96	13.9299		1646.03	30.9651		1053	29.4		1028	38.3		1734.4	16.4		2564.3	1.7		1039.9	20.6		1005.4	10.3		972.5	45.4		1056.8	64.4		1049.7	31.3		1158.4	37.9		1041
	1222.38	27.7683		1153.81	36.3131		1819.99	25.3637		2036.75	6.4092		1454.13	51.4065		1809.72	3.52832		1053	21.3		1029	26.3		1742	8.6					1040.5	17.7		1005.6	13.7		972.6	25.8		1057.6	26.8		1050.4	43.6		1132.2	70.4		1080.1
	1269.15	31.0063		1155.59	37.3373		1837.33	12.2071		1476.82	22.985					1683.25	13.3456		1054	60.6		1031	21.5		1787.6	23.3					1040.6	31.4		1006.5	13		977	48.9		1058.5	4.9		1051.3	38.1		1167.7	62.8		1457.6
	1278.32	39.7227		1158.62	30.1177		1847.24	12.7823		1033.91	14.6994					1504.06	13.2445		1054	29.6		1034	26.9		1798.1	48.3					1041	35.7		1007	13.1		977.8	31.9		1059.4	19.1		1053.6	37.1		1214.5	39.5		964.7
	1321.87	36.8751		1163.72	38.7482		1853.62	14.4147		1664.65	7.38901					2804.63	2.05277		1056	25.8		1039	17.1		2687.2	7					1042.3	59.5		1007.2	19		978.5	49.4		1059.9	29		1053.6	23.5		1220	20.7		645
	1345.64	34.2981		1166.64	54.7985		1856.33	18.2615		1458.8	14.3456					1228.17	10.8954		1056	28.9		1040	35.2		2737.6	9.8					1042.7	22.9		1011.4	19.5		979	32.6		1060.8	145.4		1054.1	33.9		1224.3	31.4		1056.3
	1379.17	23.4902		1167.24	30.3147		1856.99	13.8248								454.711	13.2238		1057	36.4		1041	28.5		2857.7	4.1					1044.1	18.2		1012.7	15.8		980.6	24.9		1064	167.2		1054.4	29.3		1226.7	28.8		1098.4
	1388.71	33.5985		1174.5	37.2588		1865.14	19.2021								1796.04	2.82527		1057	24		1042	20.2								1049.3	19.8		1014.4	15.8		986.9	35.1		1064.6	5.8		1056.5	28.3		1252.6	28.2		1182.2
	1433.55	37.036		1179.73	41.5207		1920.72	17.2586								1639.78	23.4581		1060	30.9		1047	32.5								1049.4	38.7		1015.9	19.8		990.3	42.2		1065.4	8.3		1057.5	27		1255.3	31.7		1125.8
	1555.34	29.3498		1180.59	36.1555		2636.54	66.8491								1758.65	10.7564		1060	32		1048	37.6								1051.1	36		1016.1	12.7		990.7	35.9		1065.4	139.8		1059.7	20.7		1259.5	32.6		1209.1
	1655.26	22.8027		1183.37	35.053		2741.56	69.4842								1534.11	17.3356		1060	26.6		1050	43								1053.9	26.6		1017	12.7		991.4	39.7		1068	49.3		1061.8	40		1270.4	99.9		1147.3
	1660.12	35.031		1188.03	38.4235		2782	3.60198								979.779	61.6146		1061	23.3		1052	26.7								1061.8	13.7		1017.3	18.1		996.9	39.3		1068.8	56.5		1062.5	45.5		1271.2	20		1073.9
	1665.8	26.3074		1191.13	34.0693											1684.46	18.2099		1062	32.4		1052	23.5								1062.4	9.5		1018.4	18.5		997	29		1070	20.3		1063.8	21.1		1286.3	27.1		1051.1
	1703.49	79.344		1191.78	43.2629											2179.89	43.9153		1062	31.8		1054	24.9								1063.7	11.3		1018.9	11.2		1000.1	34.5		1070.4	7		1064.6	36.6		1293.2	35.7		1006
	1716.56	23.3865		1196.57	45.437											1736.24	2.82392		1063	35.1		1055	23								1064.2	37.2		1019.1	17.2		1000.2	34.3		1070.4	14.2		1065	38.3		1307	53.1		398.9
	1814.8	26.4051		1199.11	59.3183											1276.27	7.40896		1063	19.7		1055	33.7								1065.1	12.5		1022.3	18.1		1002.3	34		1070.4	23		1065.5	43.8		1311.3	21.4		1843.6
	1892.05	20.0386		1205.91	55.4103											1750.01	9.37342		1063	52.2		1055	30.7								1066.7	188.6		1031	18		1002.5	18.7		1070.6	14.8		1068.1	32.9		1350.6	49.4		1442.6
	2179.8	21.9438		1221.01	47.9339											1910.65	4.47396		1064	24.8		1057	25.8								1067.3	15.5		1031.4	21.8		1004.8	54.5		1071.5	25.4		1068.7	35.4		1352.4	79.3		1274
	2631.81	26.8483		1221.9	26.7135											1003.58	26.9038		1065	45.5		1057	34.5								1067.7	13.5		1031.9	13.2		1005.4	51.3		1071.7	21.2		1069.9	32.2		1382	28.3		1108.7
	2686.52	24.0089		1228.58	30.2686											1791.55	3.7308		1065	25		1061	24.6								1068.1	14.2		1034.9	18.5		1007.6	30.8		1072.1	7.7		1072.1	30.6		1458.1	67.1		2706.1
	2700.52	24.8407		1236.42	31.1563											940.113	31.0401		1067	23.8		1062	50.4								1068.4	18.4		1036.2	18.9		1010.1	16.3		1073.6	20		1076.1	24.7		1505.2	39.1		2954
				1237.28	43.3487											1350.99	7.47746		1068	25.3		1064	26.1								1068.9	52.2		1051.1	17.2		1011.7	57.6		1073.7	12.7		1077.8	35.8		1677.4	62.4		443.4
				1254.81	32.1525											1240.91	27.0904		1069	23.9		1066	24.9								1069.5	27.8		1054.7	15		1012.5	35.4		1074.6	23.9		1079.3	36.3		348.3	6.6		1084
				1255.27	63.0207														1069	55.6		1067	44.2								1071.7	18.4		1056.5	18		1013	48		1075.1	7.9		1079.6	23.1		348.9	4.7		1072.9
				1264.45	46.3851														1070	33		1067	36.5								1072	23.9		1056.8	17		1013.7	20.5		1076	80.5		1080.9	31		360.6	8		1557.2
				1266.37	42.0875														1071	35.9		1069	31.1								1075.4	23.2		1070.1	14.7		1013.7	23.2		1077	16.2		1081.1	45.1		364.7	5.4		2885
				1278.11	33.2603														1072	17		1070	34.1								1075.6	4.7		1079.5	12.6		1014.3	55.3		1080.1	41		1082.1	34.4		368.2	9.3		1639.8
				1311.25	36.4753														1075	31.3		1070	55.4								1076.7	7.3		1098.8	19.6		1014.7	33.7		1082.1	25.4		1083.2	33		369.5	6.8		1606.3
				1313.94	32.0382														1076	24.5		1074	35								1077.2	32.6		1099.3	20.5		1016.6	55.9		1082.7	31.1		1084.7	32.1		380.3	7.8		1237.1
				1328.52	43.5028														1077	31.9		1075	22.3								1080.7	14.6		1105.4	10.6		1020.2	30.3		1086.1	20.3		1085.2	37.3		385	6.5		1408.2
				1346.36	33.7819														1079	37		1075	45								1080.9	5.1		1108.4	29.4		1020.6	34.3		1086.2	4.4		1087.1	42.9		392.1	7.2		1376.9
				1349.48	58.1796														1080	36.5		1076	29.3								1082.3	16.7		1110.5	33.3		1022.3	59		1092	23.4		1089.5	41.4		402.5	8.5		663.9
				1366.49	51.0833														1080	19		1077	40.8								1082.4	38.8		1112.4	41.9		1023.2	19.6		1094.8	13.4		1089.6	36.1		411.1	5.6		2700
				1381.78	33.3883														1081	44.3		1078	21.2								1083.7	16.3		1120.9	17.3		1025.3	35.1		1097	43.6		1089.9	33.4		422	9.4		1799.8
				1398.47	29.0275														1083	26.6		1079	36.2								1084.9	85		1121.9	12.2		1025.4	72.5		1099.6	11.3		1092.4	54		441	4.3		1071.2
				1403.57	43.2861														1084	43.7		1080	29.3								1088.6	50		1137.3	14.2		1026	13		1100.7	31.3		1093.4	39.7		475.4	15.4		1111.5
				1403.8	44.8617														1084	28.4		1082	22.6								1088.9	36.6		1146.1	13.7		1026.1	40.1		1104.4	19.5		1094.5	39.4		1197.6	67.5		1460.4
				1406.51	39.9057														1085	21.7		1088	22								1089	51.7		1155.5	18.6		1026.4	23.2		1105.7	12.5		1095.7	29		968.8	26.2		1575.6
				1421.67	30.0841														1085	21.7		1088	17.7								1090.8	44.6		1159.5	17.6		1026.6	31.7		1106.4	26.1		1095.8	27.2		1066	56.8		1673.9
				1428.56	48.2106														1088	20.9		1090	19.9								1091.2	60.5		1166.5	16.5		1026.7	17.5		1113.6	74.6		1096.2	36.3		988.1	39.9		2795.8
				1430.62	30.4632														1089	51.2		1091	24.3								1091.7	72.7		1170.5	14.2		1027.7	22		1115.3	67.5		1098	32.2		1008.2	39		1679.3
				1437.54	32.4463														1089	20.1		1092	16.9								1092.3	68.1		1172.4	16.8		1029.7	51.6		1116.2	25.2		1098.8	43.4		1024.1	42.5		432.8
				1454.54	31.0513														1089	48.4		1094	20.4								1094.8	36.9		1173.5	12.9		1029.9	21.6		1119.4	21.3		1099.3	43.1		1121	101.5		1013.4
				1487.65	42.0916														1090	27		1094	24.8								1096	27.2		1175.6	15		1030.6	34.4		1120.4	20.5		1101.9	44.1		1000.2	35.6		1097.3
				1507.41	36.3978														1090	24.7		1096	20.3								1096.2	9.5		1181.2	13.1		1030.8	15.7		1121.5	4.3		1103	30.9		1044.3	43		1662.9
				1536.65	27.1273														1090	39.7		1104	14.6								1099.3	6		1181.4	10.6		1031.6	53.3		1122.9	21.2		1103.1	24.7		1015.3	35		2502.8
				1539.64	30.3609														1092	25.7		1104	32.1								1102.1	39		1182.1	12.9		1031.8	32.7		1124.8	87.9		1106.3	25.8		1131.1	30.2		1168
				1561.59	34.2209														1093	27.7		1106	17.4								1106	101.1		1184.1	21.9		1032.5	47.2		1127.7	44.4		1107.4	36.7		1055	32.9		2756
				1599.16	40.4125														1093	19.6		1107	21.6								1107.2	56.8		1184.7	12.6		1034	27.4		1129	41.4		1108.5	38		1069.2	32		1221.7
				1625.6	28.2626														1096	33.5		1117	22.1								1107.6	51.1		1189.2	17.8		1035.2	25.9		1129.8	106.7		1109.6	37.2		1104.1	31.9		2695.5
				1631.06	22.9321														1096	25.6		1119	35								1109.7	53.6		1190.1	17.6		1035.2	26.2		1135.9	44.8		1111.3	33		1064.6	29.8		1114.3
				1647.34	35.835														1097	32.6		1121	26.2								1112.9	26		1210.4	12.4		1036.1	33.4		1138	14.2		1112.2	37.4		1090.3	34.7		1585.3
				1653.11	46.1094														1097	40.6		1125	41.1								1113.5	31.8		1212.6	12.6		1036.3	25.6		1138.7	53.5		1113.2	36.7		1118.9	44.5		1041
				1663.65	30.7638														1101	48.1		1127	20.4								1113.6	23.4		1219.2	16.4		1037.6	44.5		1138.8	13.8		1114.8	32		1031.9	24		799.3
				1728.25	32.2962														1101	33.8		1128	29.8								1115.6	9		1220.8	17.2		1039	25.9		1144.2	19.5		1116.3	38.2		1028.5	50.8		1070.8
				1732.95	34.6987														1105	52.1		1128	19.2								1115.7	48.9		1226.7	13.2		1039.5	19.7		1147.4	10.5		1118.4	35.9		1069.1	39.4		1404.1
				1759.26	29.7951														1108	26.5		1130	16.7								1117.7	23.6		1227.3	12.5		1040.2	17.8		1147.6	24.7		1119.9	43.4		1088.7	33.4		2712.4
				1819.33	19.9276														1113	39.5		1133	19.3								1122.8	38.9		1227.7	17.1		1041.2	29.7		1149	6.6		1120	38.1		1045.8	41.8		1042.7
				1820.92	25.9539														1116	42.1		1136	16								1126.4	26		1231	17.5		1043.3	26.9		1149.6	17.4		1120.1	32.4		1039.4	20.8		1172.5
				1823.45	63.2421														1116	50.1		1139	19.4								1126.5	44.6		1231.8	10.3		1044.6	46		1150.2	20.4		1120.8	33.3		1065.4	48.3		1318.4
				1921.24	27.5296														1118	20.1		1146	21.2								1127.6	124.3		1232.6	15.9		1045.4	22.2		1150.9	21.2		1124.6	39		1067.3	37.6		955
				1981.95	44.4148														1118	54.4		1146	16.7								1129.1	151.7		1233.6	10.5		1045.6	63.1		1151	50.6		1126.2	29.7		1053	51.9		1088
				2064.79	33.9247														1120	18.7		1150	23.5								1129.9	15.9		1234.7	12.5		1045.8	32.5		1151.7	33.5		1129.8	41.9		1048.4	35.1		979.2
				2550.11	29.242														1121	23.5		1152	28.4								1130.4	24.7		1255.1	17.9		1046.7	26.2		1153.5	20.9		1130.1	31.1		1130.7	35.4		1030.5
				2640.28	29.6396														1121	35.3		1156	19.5								1130.5	10.2		1268.1	25.7		1046.8	34.8		1153.9	48.3		1132.7	36.2		1067	30.6		934.3
				2697.67	37.8344														1121	18.6		1157	21								1134	69		1268.6	14.4		1047.1	62.4		1154.1	7.8		1133.6	38.9		1106.5	62.4		2391.2
				2697.75	22.4725														1122	21.9		1158	22.4								1134.1	7.4		1275.5	17.2		1047.3	41.7		1154.5	46.4		1133.7	27.3		1025.6	82.9		1841.5
				2851.16	27.008														1129	28.9		1161	18.9								1134.6	36.4		1278.9	12.5		1048.3	26.7		1155.3	17.3		1134.4	42.1		1135.6	39.7		1100.5
				2898.39	24.9817														1130	29.8		1169	19.8								1135.9	67.1		1292.9	49.5		1050.7	28.4		1155.9	29.6		1135.8	28.2		1050.9	45.1		1708.6
																			1131	47.3		1170	18								1138.4	40.2		1305.7	11.1		1051.9	17.7		1157.8	93		1139.1	31.6		1092.5	24.9		946.7
																			1131	32.7		1173	29.8								1140.1	17.5		1309.4	12.7		1052.1	37.7		1160.3	41		1142	29.2		1112	51.2		1023.2
																			1134	21.3		1173	28.9								1140.2	62.3		1320.4	56.2		1060.1	40		1161.5	13.1		1146.3	40.5		1159.3	36.9		1051.9
																			1134	16.3		1175	18.9								1141.6	71.5		1322.1	9.8		1060.6	38.3		1163.4	7.7		1149.6	23.4		1099.9	41.9		1041.2
																			1136	28.8		1191	17.1								1143.1	6.8		1322.1	9.9		1060.7	41.3		1166.5	28.2		1151.1	35.2		1119	20.5		994.9
																			1137	28.2		1214	30.4								1146.6	16		1327.9	16.1		1061.2	30.8		1167.2	107.3		1151.9	35		1167.5	64.9		988.1
																			1138	26.8		1219	36.2								1147.2	15.8		1332.5	13.5		1062.3	37.3		1167.4	13.3		1152.5	29.6		1130.6	34		1214.7
																			1139	32		1233	19.9								1149.5	24.6		1332.9	12.2		1063.9	24.3		1167.5	38.2		1152.7	26.9		1191.2	29.4		1118.9
																			1141	34.8		1248	16.4								1151.1	13.7		1336.8	10.8		1071.2	38.5		1167.9	12.1		1155.4	34.8		1199.6	64.4		1304.2
																			1141	34.5		1254	55.1								1159.8	20.9		1339.2	10.4		1073.7	41.3		1169.1	16.7		1155.5	26.3		1192	31.4		1832.1
																			1147	44.5		1264	17.2								1160.6	20.5		1376.9	15.1		1074.2	20.8		1169.4	9.2		1156.3	38.8		1131.2	64.3		1458.4
																			1151	26.1		1267	22.3								1161.4	34.9		1385.4	15.4		1077.5	44.4		1169.4	10.2		1159.5	18.2		1183.5	63.1
																			1151	26.9		1271	23.6								1162.2	11.1		1401.2	15.1		1079.3	25.8		1169.8	106.7		1160	29.4		1197.1	54.9
																			1155	37.2		1282	32.1								1166.3	59.9		1415.8	30.4		1079.8	34.5		1172.3	23.6		1163	41		1193.5	40.8
																			1157	21.6		1285	47.5								1173.9	9		1419.2	15.1		1081.2	24.7		1172.7	19.9		1163.2	39.4		1148.9	26.7
																			1161	48.9		1287	19.3								1174.9	14.3		1425.9	13.8		1083.2	51.9		1173.4	23		1163.4	27		1194.7	34.2
																			1162	44.3		1290	24.1								1175.7	7.3		1459.4	11.1		1085	34.4		1173.5	24.9		1164.6	32.7		1169.8	60.4
																			1166	32.6		1293	18.6								1176.3	6.9		1476.3	10.6		1085.7	32.2		1175.3	175.9		1167.6	20.2		1195.9	19.8
																			1167	49.3		1295	34.3								1176.5	13.4		1481.6	10.5		1085.8	20.6		1175.3	5.8		1167.6	45.5		1192.1	20.4
																			1170	35.8		1299	39.1								1178.1	10		1503	13.1		1087.3	25.7		1178.2	48.5		1167.9	33.9		1211.8	20.7
																			1171	33.7		1319	18.1								1182	27		1518.5	18.4		1088	35.6		1178.6	56.8		1169.5	26.4		1225.4	65.8
																			1172	21.8		1324	39								1189.1	67.8		1540.3	9.5		1091.1	34		1178.7	62.2		1169.6	38.6		1230.2	35.1
																			1176	29.1		1324	24.4								1189.4	7.8		1549.1	16.8		1091.7	35.6		1179.6	8.2		1173.1	42		1239.4	44.2
																			1178	21.1		1324	16.3								1190.6	143.3		1553.8	10.2		1093.3	25.7		1180.1	21.1		1173.9	41.2		1247.8	43
																			1179	21.9		1336	17.7								1191.3	15.4		1554.4	10.8		1094	22.7		1181.4	17.5		1174.6	24.5		1258.7	27.6
																			1193	38.9		1340	15.6								1211.4	58.8		1596.4	12		1094.1	18.3		1182.3	38.3		1178.5	33.7		1265.2	83.8
																			1195	23.3		1350	15.3								1227.4	67.5		1605.1	11.8		1094.2	22.7		1185.9	17.9		1179.1	38		1306.3	39.4
																			1196	23.7		1350	20.4								1237	11.5		1620.6	12		1095.4	45.1		1186.4	19.5		1180.7	31.2		1334.6	31.9
																			1196	22.2		1353	33.9								1240.6	75.8		1640.3	43.1		1096	29.8		1186.6	30		1181.2	40		1360.8	54.7
																			1197	40.8		1357	22.3								1249	6.7		1654.8	11.6		1096.2	39.9		1188.8	69.9		1185.5	47		1392.9	23.4
																			1204	24.9		1362	18.1								1250	149.2		1693.9	9.8		1096.5	18.6		1191.2	17.1		1185.5	30.1		1395.3	29.2
																			1204	31		1365	19								1254.7	36.4		1697.1	19.5		1096.5	58.3		1191.3	26.4		1186.5	30.5		1407.9	99
																			1205	42		1366	16.6								1269	75.1		1748.3	10.6		1097	32		1191.6	26.9		1188.5	28.3		1474.3	36.3
																			1207	36.9		1369	18.3								1272.5	26.4		1761.8	12.4		1098.4	40.8		1192	19		1189.3	36.5		1478.9	28
																			1209	46.4		1377	22								1273.1	14.3		1766.2	12.8		1099.8	28.2		1192.5	55.4		1190.2	38.2		1481.3	38.6
																			1212	22.4		1380	19.9								1276.7	77.8		1791.5	11.5		1101.1	34.1		1192.7	19.3		1190.5	30.1		1599.8	18.9
																			1217	41.4		1380	32.5								1276.8	52.1		1883.3	17		1102	24.7		1193.2	13.9		1191.8	29.5		322	8.6
																			1245	21.1		1425	13.3								1277.4	48.8		1899.4	9.2		1104	37.3		1195.6	22.3		1192.6	33.7		359.1	3.5
																			1246	28.1		1434	20.7								1293.1	6.1		1966.6	10.9		1104.2	34.6		1199.3	36.1		1193.1	36.2		363.7	10.7
																			1265	22.4		1469	21								1298.8	39.9		1969.1	16.6		1105.5	34.2		1199.5	112.8		1194.6	39.5		376.5	6.5
																			1271	25.8		1475	12.9								1303.2	34.1		2095	12.7		1108.9	32.3		1202.4	13		1195.5	34		384.6	7.2
																			1279	27.8		1477	23								1305.4	48.1		2418.8	9.6		1110.4	23.6		1202.7	15.7		1198	30.1		422.7	13
																			1300	16.5		1485	27.6								1311.7	40.9		2695.7	12.1		1112.6	33		1208.1	3.2		1203.5	24.9		524.6	9.4
																			1309	12.9		1487	18								1313.7	29.3					1116	21.3		1210.4	24.5		1203.9	28.8		593.8	6.2
																			1315	28.5		1499	18.5								1317.1	4.6					1120.4	29.8		1211.4	19.3		1204.1	47.3		981.3	54.6
																			1315	28.5		1504	27.4								1324.7	128.3					1124.4	45.4		1212.1	190.6		1207.1	24.5		899.2	138.8
																			1316	38.3		1504	15.5								1324.7	27.3					1125.8	22.3		1212.2	65.7		1210.3	32.7		1087	69.8
																			1335	35.6		1513	24.2								1325.8	19.8					1126.4	14.9		1212.4	13.8		1211.3	23.3		965	59.7
																			1345	24.5		1518	15.6								1328.9	10.9					1130.4	23.1		1213.4	30.8		1211.5	39.5		1017.6	63.5
																			1361	27.7		1534	18.2								1338.2	8.6					1134.6	24.9		1213.9	10.5		1217.9	35.2		954.1	92.7
																			1370	20.5		1537	15.3								1341.8	26.5					1137.2	22		1217.6	22.6		1222.6	32.1		935.2	41.3
																			1372	25		1547	21.1								1342.8	11.2					1137.2	31.7		1233.6	15.7		1223.1	29.8		1097	50.9
																			1381	19.5		1558	28.3								1351.2	27.9					1139.8	27.1		1233.9	14		1227.5	47.2		1212.5	64.3
																			1382	23.9		1561	35.1								1356.2	31.7					1142.8	25.1		1235.1	48.9		1229.2	42.4		1023.9	27.9
																			1399	31.1		1616	11.6								1356.6	99					1143.5	21		1235.3	17.9		1229.3	31.7		982.2	66.6
																			1412	20.6		1618	13.9								1365.9	22.3					1144.7	29.2		1235.5	13.1		1230.2	45.2		1136.7	63.6
																			1436	18.1		1627	16.2								1367	24.6					1145.2	24.8		1235.7	12.4		1238.9	33.8		1096.9	33.6
																			1445	19.9		1630	16								1370.1	101.6					1145.6	27.3		1237.8	10.3		1239.4	36.4		1114.5	202.2
																			1452	14.6		1631	15.2								1371.4	26.7					1146.3	23.4		1241.5	42.4		1241.8	40.2		843.2	156.4
																			1460	18.6		1637	17.2								1372	22.7					1149.8	30.1		1248.9	22.9		1242	29.4		1062.5	36.5
																			1460	22.8		1639	21.4								1374.5	11.9					1150.2	35.5		1252	37.4		1242.4	56.1		1078.2	51
																			1462	18.2		1640	22.4								1375.6	10.3					1150.5	33.9		1271.7	7.6		1244.2	35.1		1192	49.8
																			1472	21.7		1649	15.2								1379.7	20					1150.9	18.7		1271.8	15.5		1246	39.5		1010.9	72.7
																			1473	14.8		1649	13.5								1392.3	8.3					1151.5	22.9		1275.3	21.4		1246.2	37.2		1013.6	63.2
																			1476	21.9		1653	24.1								1392.6	12.1					1153.6	25.1		1284.1	8.8		1246.3	39.7		969.7	58.2
																			1486	23.5		1667	19								1397	36.5					1154.2	22.1		1284.8	29.8		1250.7	16.4		1038.3	30.4
																			1489	25		1677	26.1								1397.2	11.5					1156.2	20.7		1289.1	20.6		1254.6	42.7		1023.7	28.7
																			1498	16.6		1677	16.6								1408.5	19.2					1159.1	42.2		1290.6	14.9		1254.6	34		1058.8	71.8
																			1499	32.3		1689	16.8								1410.3	6.3					1159.9	35.8		1295.7	47.2		1261.2	36.7		1023.9	56.9
																			1502	14.3		1692	15.5								1437.9	16.1					1162.6	29.6		1296.5	18.6		1276.7	46.9		1037.2	54.2
																			1528	24.7		1693	20.3								1441.3	12.7					1163.8	37.8		1297.9	29.4		1277.6	41.1		1045.9	79.4
																			1574	22.8		1709	13.2								1444.7	32.1					1164.1	18.2		1304.1	32		1279.5	46.9		1108.7	99.7
																			1579	17		1711	18.5								1453	6.9					1165.3	24.2		1304.8	19.8		1280.3	44.7		1055.8	56.1
																			1621	14.4		1712	20.8								1468.5	21.5					1169	33.5		1309.4	29.5		1284.1	30.5		1143.5	99.2
																			1621	17.7		1715	13.8								1488.1	14.4					1169.4	14.2		1312.1	27.7		1290.2	32.5		1088	52.2
																			1627	16.2		1726	16.1								1493.3	10.3					1170.1	28.6		1314.6	27.1		1290.8	29.3		1008.5	47.5
																			1632	13.6		1730	15.4								1494.6	7.1					1171.1	25.2		1317.8	7.3		1293.8	41.8		1023.7	35.5
																			1636	20.5		1730	19.7								1497.2	19.1					1171.4	48.6		1319	15.3		1303.2	34.2		1132.8	32.6
																			1636	38.8		1732	20.2								1498.1	38.2					1176.9	32.5		1322	41.9		1304.1	30		1058.9	20.5
																			1652	14.9		1737	20.7								1501	14.9					1176.9	24.5		1329.4	14.2		1308.3	24.3		1096.6	43.7
																			1654	18.7		1738	17								1502.8	6.7					1179.6	24.3		1332	37.6		1308.7	31.7		1094.2	53.8
																			1722	14.9		1745	15.3								1503.1	5.9					1179.8	61.3		1333.1	18.7		1309.2	27.9		1053.8	64.6
																			1725	13.6		1748	18.7								1503.5	15.6					1182.4	21.1		1336.2	7.9		1317.3	25.6		1076	34.4
																			1725	17.5		1749	16.3								1527.1	9.3					1183.7	31.4		1341.8	25.5		1318.5	18.4		1093.8	71.2
																			1730	20.6		1754	9.4								1532.4	54.1					1185	22.7		1343.3	72.5		1319.5	22.7		1054	48.8
																			1733	21.2		1755	17.3								1543.4	3.8					1185.3	22.3		1347.7	23.5		1326.1	43		1131.6	46.7
																			1739	12.4		1758	10.5								1589.7	10.7					1185.4	15.8		1351.5	24.4		1327.1	50.2		1047.6	27.7
																			1753	15.2		1781	15.6								1598.3	59.5					1187.5	20.5		1356.2	75		1330.5	26.5		1144.4	112.4
																			1765	18.1		1787	10.3								1615.8	4.9					1191.2	23.6		1359.6	31.9		1332.2	29.6		1072.3	41.6
																			1770	15.1		1789	15.4								1616.9	19					1192.7	23.6		1360.6	28.9		1350.2	25.5		1136.2	33
																			1785	15.1		1790	15								1617.3	21.1					1193	33		1362.5	23.1		1351	34.2		1108.5	42
																			1792	16.5		1793	14.5								1618.2	19.7					1193.4	24.5		1366.3	20		1353.6	39.8		1150.5	40
																			1797	15.7		1795	17								1622.4	34					1195.9	35.5		1369.7	24		1355.1	27.4		1115.3	41.2
																			1808	14		1796	22.6								1629.4	8.1					1196.2	31.8		1370.7	12.5		1355.3	38.6		1108.6	54.9
																			1811	22.2		1828	24.9								1632.4	18.6					1198.1	24.9		1371.2	15		1356.4	30.5		1126.2	54.9
																			1812	18.9		1837	14								1633.3	24					1200.5	26.1		1374.5	20.4		1379.3	28.5		1167.1	49.9
																			1830	18.2		1837	16.2								1636.1	37.4					1202	18.4		1380.3	15.2		1381.3	24.9		1087.7	53.5
																			1837	17		1852	12.9								1637.4	5.3					1204.3	15.8		1393.8	33.8		1384.6	43.7		1204.5	29.2
																			1839	13.8		1854	20.1								1637.5	9.2					1204.4	40.7		1394.3	20.2		1385.8	90.8		1131.6	58.3
																			1845	20.7		1857	20.4								1637.7	12.8					1214.2	22.2		1394.3	3.8		1397	28.1		1196.1	86.2
																			1860	13.7		1863	18.9								1639	8.4					1217.6	22.6		1395.6	25		1411.3	36.2		1116.1	74.8
																			1878	16.6		1869	19.7								1642.7	22.4					1219.3	12		1396.7	33.6		1420.1	49		1197.3	73.9
																			1893	15.2		1869	12								1644	14.5					1221.9	27.6		1400.4	16.9		1433.3	25.1		1206.5	49.8
																			2379	14.8		1871	11.4								1645.8	21.5					1226.2	27.4		1424.4	18.7		1435.3	40.9		1208.6	24.8
																			2390	24		1883	23.4								1647.6	13.5					1226.8	28.2		1429.8	41		1435.6	34.9		1224.1	48.5
																			2444	13.9		1883	15.7								1648.4	3.9					1234	34.6		1430.4	10.2		1443.4	28		1239.7	52.6
																			2548	17.6		1885	15.3								1648.9	4.9					1234.8	30.1		1434.1	23.2		1444.8	23.6		1243.1	35.7
																			2555	10.2		1891	20.3								1649.1	36.1					1236.9	38.1		1435.5	13		1444.8	34.9		1249	52
																			2586	10.2		1894	14.4								1649.5	16.1					1240.3	37.3		1444.6	8.2		1448.7	38.2		1260.4	57.5
																			2595	17.5		1927	17.4								1650.6	14.7					1240.7	21.1		1447.9	27.2		1450.9	39.7		1289.6	61.8
																			2599	16.9		1976	15.7								1653.2	4.6					1243.8	18.3		1449.7	19.1		1453.7	40.9		1297.1	25
																			2616	11.4		1980	12								1653.6	14.2					1257.3	40.1		1451	12.2		1453.8	29.5		1301.8	29
																			2633	13.5		2006	14.8								1653.9	85					1260.7	20.3		1452.4	9.8		1457.7	34.5		1337.9	82.1
																			2661	14.2		2025	12.8								1654.9	6.2					1263.5	29.1		1453.4	4.8		1462.4	24.8		1342.3	45.1
																			2661	11		2241	13								1655.4	10.1					1279.2	28.7		1453.7	17.4		1470.5	38.3		1358.2	21.2
																			2667	14		2572	15								1655.9	3.9					1293.1	34.1		1457.3	17		1471.1	45.1		1358.9	19.7
																			2673	12.2		2640	14.6								1656.3	14.3					1298.6	19.4		1460.7	54.3		1472.6	31		1373.5	64.6
																			2676	16.3		2643	10.8								1658.4	9.1					1299.9	28.3		1466.2	24.1		1477.7	25.7		1393.6	116.4
																			2677	15		2654	14.4								1661.2	20.4					1302.4	30.3		1467	14.9		1483.3	33.6		1408.3	41
																			2682	15.4		2676	10.6								1667.2	11.6					1334.6	24.2		1478.6	41.4		1483.9	32		1422.1	45.2
																			2683	20.2		2683	17.3								1669.5	17.8					1338.6	16		1479.4	37.7		1486.1	24.8		1441.1	37.6
																			2684	14.9		2684	14.5								1673.7	11.2					1342.3	24.1		1544.3	64.7		1487.6	31.2		1667.5	45.8
																			2686	16.5		2685	12.3								1679.7	20.5					1348.5	32.8		1548.3	91.8		1487.8	36.6		1679.4	19.9
																			2690	14.1		2685	13								1684.2	8.4					1352.4	30.1		1588.4	2.2		1491.3	45.9		2708.6	39.4
																			2690	19.1		2686	14.6								1689.7	12.4					1354.5	22.4		1603.2	6.6		1502.7	35.1		2715.5	34.2
																			2691	12.5		2695	9.3								1708.2	16.3					1357.9	10.6		1606.1	14.7		1520.9	50.2		348.4	5.2
																			2692	18.3		2696	13.8								1725.9	3.9					1360.4	19.6		1630.7	31.1		1526.7	29.7		349.5	7.1
																			2693	17.6		2699	11.7								1738.3	6.1					1373.1	41		1638.5	15.8		1534.1	25.7		352.3	8.9
																			2697	23.6		2701	12.2								1743.4	4.5					1377.6	19		1699.7	17.4		1550.2	27.3		357	7.7
																			2698	17.4		2704	17.3								1744.5	6.3					1380.8	36.2		1770.1	8.4		1615.4	36		357.7	8.4
																			2702	16.4		2709	14.1								1745.9	11.7					1381.6	21.5		1895.2	7.3		1628.2	26.4		373.8	8.5
																			2704	21.9		2717	12.8								1749.5	14.5					1382	66.7		2659.5	18.6		1637.8	22.4		375.4	10.2
																			2708	11.3		2719	14.7								1756	9.3					1390.8	32.4		2715	18.1		1658.6	33.6		391.4	10.9
																			2709	19.9		2724	15.1								1756.6	15.4					1396.3	19.4		2720.8	8.8		1661.9	26.4		402.6	6.2
																			2715	10.2		2728	18.8								1761.2	31.8					1403.6	30.9					1662	32.5		406.3	9
																			2716	11.3		2733	16.4								1763.7	4.6					1406.2	28.2					1688.1	34.6		583.4	17.7
																			2717	20.1		2738	15.4								1783.9	20					1422.7	40.4					1730.4	26.5		605	13.1
																			2718	13.9		2740	12								1784.7	11					1428.4	24.2					1733.5	44.5		748.1	10.5
																			2719	18.4		2742	12								1792.5	11.3					1439.2	25.8					1839.3	23.4		916.2	111.2
																			2720	11.9		2754	13.6								1803.7	5.6					1447.9	25.2					2153.7	38.5		937.2	57.7
																			2723	17.9		2787	21.2								1806	19.1					1449.6	34.5					2668.7	24.4		1186.9	101.2
																			2724	19.6		2799	15.1								1807.8	4.6					1453.8	34.9					2679.6	29.2		1051.6	36.7
																			2726	12.6		2836	14.3								1808.9	13.3					1455.1	21.9					2696.9	25.8		1025.3	40.7
																			2727	15.7		2891	11.3								1811.2	6.7					1468.7	31.6					2763.7	28.9		985.7	44.2
																			2728	16.6		2968	19.6								1811.3	12.2					1473.1	18								1007.8	20.4
																			2736	15.9		2972	10.3								1842.4	4.6					1478.1	27.2								1076.3	41.8
																			2739	17.8		2973	16.7								1843.1	39.4					1485.8	40.3								1126.7	31.6
																			2740	14.5		307	4.3								1896.3	6.9					1523.6	28.4								1140.4	34.6
																			2748	22.2		319	7								1901.2	10.2					1529.7	25.3								1098	100.2
																			2749	14.2		321	5.1								1906.1	7.6					1565.1	19.4								1071.7	22.2
																			2815	12.7		333	4.8								1987.2	3					1577.7	25.8								1050.7	48.6
																			2831	12.5		337	4								2531.9	6.8					1583.9	27.2								1218.9	77.3
																			2855	19.4		338	5								2566.8	2.5					1603.6	20.5								1031	42.9
																			3594	11.5		338	4.4								2567.5	7.8					1626.1	19								1079.4	45.9
																			310	5.4		340	4								2583.6	5.2					1637.8	17.7								1020.6	58.2
																			315	4.9		351	5.6								2673	11.6					1641	24.8								1053.4	64.3
																			317	5.7		352	6.3								2688	10.9					1656.7	22.5								1048	35.7
																			369	4.9		360	6.2								2696.2	2					1656.9	39.2								1200.6	118.3
																			371	7.1		361	5.8								2701.7	4.2					1667	25.5								1032.3	36.5
																			375	7.4		363	5.4								2702.4	3.8					1674.6	28								1071.3	20.2
																			376	7.1		366	7.3								2708.1	2.7					1701.2	39.7								1166.2	58
																			379	6.2		373	5								2709.9	7.5					1732.2	30.6								1068.5	52.8
																			388	7		379	7.4								2714.1	12.1					1745.9	21.2								1042.7	43.3
																			390	8.8		380	6.6								2714.6	2.7					1759.6	26.3								1030.1	50.6
																			401	6		383	5.1								2716	6.4					1761.8	15.4								1049.6	33.3
																			403	7.6		385	5.7								2716.3	3.1					1780.7	18.6								1092.9	46.4
																			403	6.4		385	6								2718.4	3.2					1795.7	17.3								1184.5	62.8
																			406	6.2		393	5.6								2723.5	10.3					1816.1	22.8								1212.5	84.9
																			407	10.7		395	6.9								2724.2	2.3					1822.4	13.5								1121.5	43.9
																			409	6.6		396	5.9								2726.2	12.3					1823.3	19.3								1163.9	33.8
																			410	6.9		404	6.4								2728.9	2.6					1868.1	17.7								1105.6	41.7
																			411	6.4		408	6.6								2748.9	5.3					1876.3	19.4								1052	29.7
																			412	9.3		412	6.8								2751.4	6.8					1881.9	23.2								1212.1	67
																			413	8.6		412	7.8								2763.4	2.2					2675.1	26.7								1175.4	67
																			416	6.8		414	7.6								2791.2	5.2					2682.8	17.1								1251	47.5
																			418	7.8		415	6.3								2813.1	2.4					2718.1	13								1078.5	21.1
																			422	7.8		415	5.9								2986	2.6					2728.3	9.8								1229	115.9
																			427	7.2		415	5.8								3007.2	1.2					2773	15.8								1175	42.8
																			434	9.8		415	5.2								3591.4	7.9					2846.4	16.8								1217.6	30.5
																			435	8		416	6.3																							1142.6	85.4
																			461	6.7		420	6.4																							1187.9	33.8
																			465	11.7		423	7																							1184.3	29.9
																			469	8.7		425	8																							1148.4	36.4
																			473	8		425	6.4																							1188.2	58.8
																			543	9.4		432	6.1																							1212.9	29.7
																			546	9.5		433	6.6																							1132.8	46.6
																			605	12		461	6.2																							1099.8	53.8
																			607	10.2		463	6.7																							1190.5	32.8
																			608	9.9		468	6.9																							1214.1	35.7
																			610	8.9		527	9																							1152.5	20
																			613	11.1		529	7.4																							1210.3	55.6
																			614	8.2		529	8.1																							1237.5	33.1
																			833	16.6		535	8.1																							1242.5	21.2
																			931	53.9		535	9.7																							1258.3	37.4
																			936	32.2		536	8.6																							1270	101
																			945	33.5		544	8.4																							1310.7	31.4
																			953	25		545	8.8																							1312.3	33.6
																			959	32.8		546	7.9																							1313.1	49.9
																			961	35.7		547	8.7																							1332.7	52.3
																			962	38.1		551	9.9																							1399.2	44
																			964	36.1		555	9.7																							1408	43.9
																			968	34.4		556	8.6																							1457	62
																			978	30.2		564	8.5																							1471.2	45.7
																			982	21.9		566	7.5																							1475.4	47.6
																			993	32.5		569	7																							1486.9	29.4
																			1000	29.9		572	8.6																							1497.1	33.4
																			1001	38		580	9.4																							1497.3	24.8
																			1002	25.6		581	10.9																							1989	29.2
																			1002	25.4		583	9.8
																			1003	31.3		583	9.2
																			1006	28.6		585	8.4
																			1008	31.4		585	6.6
																			1019	33		586	7.7
																			1020	24.1		586	10.5
																			1021	25.3		587	7.7
																			1022	33.7		590	9.9
																			1024	30.8		593	11
																			1024	29.1		594	9.3
																			1026	40.3		594	11.7
																			1027	27.2		595	7.5
																			1029	25.1		595	7.1
																			1032	26.4		596	8.5
																			1033	30.9		596	7.8
																			1036	36.9		597	7.9
																			1037	30.1		598	12
																			1037	33		598	7.9
																			1038	28.8		600	7.7
																			1040	28.8		600	7.5
																			1041	28		601	6.2
																			1042	41		604	11.3
																			1046	28.1		606	8.1
																			1048	29.1		607	8.9
																			1048	37.1		610	11.3
																			1050	29.6		611	9
																			1051	28		616	7.6
																			1051	20.5		618	8
																			1052	32.4		618	7.2
																			1053	26.6		629	8.5
																			1053	24.4		632	9.2
																			1056	31.9		632	8.4
																			1057	28.6		632	10.4
																			1059	22.4		635	9.6
																			1061	25.8		653	11
																			1064	24.8		669	10.7
																			1068	30.1		723	10.9
																			1071	28.3		891	16.6
																			1072	28.3		902	36.8
																			1072	31.7		908	37.5
																			1072	26.3		920	41
																			1078	31.9		944	44.9
																			1079	36.7		949	58.1
																			1080	30.6		950	36.6
																			1081	30.6		954	28.4
																			1089	28		956	32
																			1090	21.9		962	22
																			1091	40.4		962	33.6
																			1092	24.2		963	30.5
																			1093	23.5		963	33.8
																			1094	27.1		964	31.5
																			1095	41.1		964	42.4
																			1099	34.3		965	35.5
																			1102	27.3		966	28.4
																			1107	22		967	48.7
																			1110	29.4		970	42.7
																			1117	36.2		972	43.1
																			1124	43.3		972	24.1
																			1127	30.1		974	29.5
																			1132	28.6		974	24.7
																			1132	32.7		978	29.1
																			1134	27.8		980	72.4
																			1136	24.6		980	22.9
																			1137	30.7		980	55.2
																			1138	24.8		984	29.8
																			1140	23.3		984	33.5
																			1143	31.7		984	20
																			1143	26.5		984	29.1
																			1148	26		986	25.5
																			1148	26.7		986	22.5
																			1148	32.5		987	33.2
																			1155	25.2		990	35.5
																			1157	36.4		994	40.6
																			1158	46		998	28.1
																			1158	47.4		1000	27.7
																			1161	30		1000	42.4
																			1161	32.9		1002	56.7
																			1164	30.9		1006	34.9
																			1165	33.7		1009	23.6
																			1167	31.7		1011	19.1
																			1184	31.5		1011	20.4
																			1186	35.2		1012	22.9
																			1187	40.7		1015	31.5
																			1188	18.4		1016	41.8
																			1189	25.6		1017	29.9
																			1189	31		1017	35.7
																			1191	24.1		1017	30.3
																			1199	30.6		1019	25.7
																			1203	23.5		1022	32.7
																			1203	31.8		1024	23.7
																			1203	29.3		1025	17.2
																			1211	29.8		1026	32.6
																			1218	25.1		1029	23.7
																			1226	33.9		1032	34.3
																			1233	23.5		1032	20.2
																			1234	24.4		1034	36.1
																			1237	77.7		1037	31.2
																			1238	31.5		1039	23.5
																			1251	39.5		1039	33.8
																			1253	38.2		1042	32.4
																			1253	27.2		1043	34.1
																			1255	25.4		1043	51.1
																			1256	39.1		1046	37.8
																			1266	29.9		1047	24.1
																			1269	58.3		1049	27
																			1278	20.2		1054	63.5
																			1291	27.3		1059	24.2
																			1317	28.7		1062	46
																			1322	28.9		1063	30.1
																			1326	25.8		1063	39.1
																			1328	28.1		1064	43.1
																			1334	32.6		1067	44
																			1335	30.4		1068	36.4
																			1336	28.4		1077	36.2
																			1339	26.2		1077	29.2
																			1343	25.6		1078	43.6
																			1346	17.6		1078	26
																			1364	32.2		1081	26.5
																			1371	23.5		1082	26.8
																			1373	22.3		1083	54.1
																			1374	27.3		1088	25.9
																			1377	31.9		1092	28.7
																			1386	27.6		1093	43.9
																			1386	33.5		1100	47.5
																			1388	22.5		1100	43.2
																			1392	22.4		1104	24.9
																			1394	33.5		1106	55.2
																			1422	28.7		1107	16.7
																			1425	21.2		1109	31
																			1440	33.1		1110	41.4
																			1440	31.1		1112	21.5
																			1446	18.9		1115	23
																			1448	33.4		1116	36.7
																			1448	24.2		1121	24.3
																			1453	25.7		1121	33
																			1457	27.7		1122	20.6
																			1463	24.7		1122	27.6
																			1468	37.6		1123	34.6
																			1484	26.1		1123	41.9
																			1488	29.1		1124	31.4
																			1488	33.7		1124	33.2
																			1489	24		1129	40.9
																			1491	20.4		1135	30.8
																			1491	31.9		1135	17.3
																			1495	24.3		1138	19.5
																			1496	28.1		1140	54.6
																			1498	26.4		1144	34.1
																			1500	23.2		1147	28.5
																			1505	22.5		1148	39
																			1509	20.8		1149	43.5
																			1559	25.4		1150	30.3
																			1571	26.5		1153	35.2
																			1593	31.7		1156	41.9
																			1597	28.6		1157	34.4
																			1618	23		1160	23.6
																			1620	34.8		1160	29.7
																			1633	26.8		1163	18.7
																			1641	19.6		1172	24.4
																			1643	32		1174	51.1
																			1647	29.9		1175	32
																			1648	30.9		1191	20.6
																			1649	27.7		1194	32.9
																			1652	22.7		1196	23.4
																			1655	24.6		1210	27.4
																			1657	27.2		1221	36.4
																			1657	22.1		1251	30.9
																			1659	36.4		1289	16.9
																			1664	31.3		1343	27.3
																			1671	22.6		1359	19.6
																			1679	24.5		1361	23.4
																			1681	28.6		1364	22.2
																			1687	22.9		1408	28.5
																			1691	25.2		1416	21.7
																			1694	30.5		1484	16
																			1700	25.9		1538	16.7
																			1706	20.8		1551	19.7
																			1730	20.5		1629	16.6
																			1733	28.7		1732	76.9
																			1737	21.2		1808	26.3
																			1741	40.1		1812	18.5
																			1761	25		1977	28.2
																			1767	24.8		1980	26.5
																			1778	21.4		2004	22.3
																			1786	25.6		2028	15.1
																			1809	50.4		2031	14.2
																			1815	23.9		2038	13.8
																			1819	19		2055	16.6
																			1826	22.6		2061	16.5
																			1862	23.2		2078	22.5
																			1866	18.7		2120	15.5
																			1866	27		2160	26.6
																			1868	27.8		2167	17.8
																			1882	31.7		2186	18.6
																			1921	21.1		2189	12.8
																			1957	23.8		2301	15.8
																			1993	20.6		2305	18.8
																			2075	26.7		2442	24.7
																			2285	17.7		2478	19.8
																			2292	77.8		2576	14.8
																			2516	23.6		2761	12.5
																			2535	23		2903	15.6
																			2568	16.9		279	6.5
																			2578	26.2		312	3.7
																			2612	19.3		313	4.1
																			2628	17.7		334	4.9
																			2653	21.2		360	6.7
																			2654	23.4		366	4.4
																			2672	23.3		366	4.3
																			2695	22.7		366	4.9
																			2717	16		368	4.8
																			2726	22.2		369	5.9
																			2736	19.1		371	5.3
																			2808	28.3		373	5.7
																			2954	21		376	4.3
																			480	12.6		376	3.6
																			1420	22.7		378	5.3
																			1137	28		386	4.1
																			1699	19.3		387	5
																			1399	19.2		394	5
																			1055	26.9		404	4.1
																			1363	27.8		405	5
																			1125	21.3		405	4.2
																			467	12.1		407	5.3
																			1070	24.9		408	4.1
																			1219	20.9		410	3.8
																			1445	31.7		410	6.3
																			1098	34.8		412	4.3
																			1012	26.9		413	5.7
																			966	32.6		413	5.3
																			1591	27.1		414	3.5
																			606	14.4		415	4.4
																			1112	36.5		416	5.4
																			1321	22.9		417	5.2
																			1220	31.1		418	4.6
																			1061	36.7		419	6
																			1650	25.7		420	6.5
																			1053	24.8		421	4.9
																			1016	38.1		421	6.8
																			1789	27.1		422	6.4
																			1012	29.2		424	5.3
																			1291	30.4		425	5.4
																			1298	26.3		429	3.7
																			1194	24.6		436	6.4
																			1213	29.1		437	5
																			459	10.4		439	4.8
																			1136	24.8		474	4.8
																			972	32.8		480	5.3
																			1008	36		491	5.3
																			1058	25		527	6.1
																			1064	34.5		537	8.2
																			821	12.7		543	6.2
																			1095	29.5		550	5
																			1813	25.8		551	6.4
																			410	10.5		554	5.4
																			1005	29.8		569	8.4
																			1755	23		575	7.3
																			1305	25.9		581	5.5
																			1434	26.5		584	7.7
																			1916	28.6		587	6.4
																			1736	31.8		596	5.5
																			1655	30		596	5.1
																			462	11.5		596	6.8
																			1541	25.4		599	6.4
																			1015	83.9		601	7.4
																			1007	25.7		601	8
																			1096	33.1		602	7.1
																			1447	31		604	10.2
																			466	10.5		605	7.1
																			1177	32.9		606	7.8
																			476	9.6		610	6.2
																			965	31.7		610	9.1
																			781	16.5		610	7.4
																			1172	27.9		611	6.3
																			1065	26.2		612	7.8
																			1518	26.9		614	8.6
																			1128	33.3		614	9.5
																			433	10.6		622	7.3
																			1685	29.9		622	6.5
																			989	33.2		623	6.5
																			499	14.2		624	7.1
																			1445	26		626	6.3
																			421	10.4		628	8.3
																			1549	23.5		629	10.1
																			430	9.2		632	7.9
																			1341	28.3		637	8.6
																			1107	25.5		640	8.6
																			473	10.9		680	10.7
																			1031	38		742	8.5
																			1165	33.8		760	10
																			1418	21.2		768	8.6
																			633	16.2		916	45.8
																			1053	37.3		920	34.5
																			347	9.5		942	37.7
																			1087	28.5		945	62.2
																			1057	29		948	52.3
																			1442	25.8		955	33
																			1252	34.6		956	48.2
																			1240	31		959	35.3
																			1174	24.3		960	28
																			1138	23.5		966	27.6
																			1361	27		967	23.3
																			1538	32.9		967	16
																			1196	31.3		971	46.3
																			1003	35.5		971	42.4
																			410	8.5		971	24.9
																			1461	19.9		972	38.2
																			1796	22.1		973	39.5
																			1029	51.4		975	23.9
																			1041	31.9		975	32.1
																			1322	28.2		981	30.6
																			1076	25.8		986	30.3
																			1093	41.6		988	36.2
																			1497	24.6		992	57.7
																			1045	36.7		996	21.9
																			1358	32.1		998	24.7
																			1460	20.6		999	37.2
																			440	9.8		1001	34.5
																			1031	33.7		1004	25.2
																			1277	29.4		1008	41.9
																			1682	24.7		1010	18.2
																			1087	30.7		1013	40.8
																			1381	29.4		1013	38.7
																			1162	36.2		1014	38.9
																			1287	24.3		1014	34.7
																			1315	27.5		1016	18.1
																			1193	27.4		1018	17.8
																			1097	27.1		1018	22.2
																			1610	31.1		1019	16.8
																			457	10.1		1019	38.2
																			2085	26.8		1020	31.2
																			1133	23.7		1020	30.8
																			396	9.5		1030	35.4
																			407	9.1		1035	26.8
																			775	17.2		1039	22.5
																			1440	24.9		1040	31.7
																			1378	32.6		1044	36.4
																			433	10.3		1044	27.6
																			1089	33.4		1045	48.2
																			1005	24		1048	35.9
																			1421	25.4		1049	47.4
																			407	6.5		1052	32.1
																			1076	39		1054	24
																			515	14.7		1055	17.7
																			1040	36.9		1057	24.4
																			416	6.7		1060	30.1
																			1151	30.9		1060	24.5
																			1690	28.8		1062	18.1
																			410	9.9		1067	38.6
																			989	30.4		1067	18.2
																			1652	29.5		1069	50.8
																			1204	26.8		1073	33.1
																			1008	27.4		1073	27.8
																			1040	30.3		1076	29.1
																			434	13.8		1079	27.4
																			412	7.9		1080	54.1
																			1166	27.6		1081	26.6
																			1374	18.7		1084	25.6
																			1187	25.6		1085	46.6
																			318	6.7		1087	20.7
																			1084	26.3		1087	43.6
																			1013	63.4		1088	42.7
																			1188	40		1088	23.8
																			1467	25.3		1088	29.8
																			1567	22.8		1090	33.1
																			426	12.6		1092	22.1
																			1523	23.5		1093	24.5
																			1095	34.1		1093	39.4
																			1517	24.8		1095	21.1
																			1014	37.2		1097	26.9
																			1129	29.2		1097	40.1
																			459	10.8		1100	36.5
																			459	9.8		1100	28.9
																			1116	29.6		1101	24.4
																			1747	22.8		1103	28.2
																			1077	27.7		1104	33.7
																			1549	28		1105	36.7
																			473	12.2		1106	25.1
																			1792	20.6		1107	20.8
																			1417	32.9		1108	39.2
																			1154	29.6		1108	36.8
																			1337	31.6		1108	21.6
																			1298	29.7		1109	29.2
																			1084	19.5		1109	24.9
																			667	13.1		1109	24.9
																			1022	36.9		1111	29.9
																			1193	33.6		1112	22.1
																			1064	27.9		1112	27.7
																			1036	28.7		1112	48
																			1386	38.9		1115	22.8
																			1060	39.5		1117	23.9
																			1500	32.4		1119	26.6
																			1133	31.3		1119	19.6
																			1199	30.9		1123	27.9
																			1264	47.2		1123	21.6
																			665	13.5		1124	29.5
																			1065	30.3		1125	33.4
																			401	11.2		1126	22.4
																			2749	13.5		1127	24.1
																			441	10		1128	27.5
																			941	30.4		1129	30.6
																			634	16		1130	19.4
																			1268	29.1		1131	23.8
																			1380	18.7		1134	31.7
																			1014	47.6		1135	32.8
																			1017	36.6		1136	14.7
																			1017	29.1		1136	22
																			1170	26.1		1137	19.7
																			1084	59.1		1137	23.7
																			1068	24.4		1137	28.4
																			1277	30.4		1142	28.7
																			356	6.9		1143	48.2
																			999	35.5		1143	27.5
																			1085	34.7		1143	33.5
																			1050	27.4		1143	27.9
																			1550	29.3		1146	25.6
																			1039	22.7		1147	31.8
																			1077	24.1		1148	18.1
																			1055	28.6		1152	30.6
																			1434	26		1153	45.6
																			1064	25.6		1154	24.1
																			1230	29.7		1155	22.6
																			572	14		1155	15.8
																			1176	23.1		1155	35.9
																			1363	25.3		1157	34.1
																			1372	23.5		1159	44.8
																			1344	25.9		1161	35.7
																			1564	29.3		1162	40.8
																			1515	25.2		1163	35.7
																			715	16.9		1164	42.8
																			2723	21.2		1165	13.3
																			1312	31.6		1169	34
																			1553	34.6		1173	34.4
																			715	17.8		1175	17.6
																			1453	35.7		1176	39.1
																			1073	36.3		1184	41.9
																			986	35.3		1189	27.9
																			1028	34.2		1195	44.9
																			1427	31.6		1201	20.9
																			1573	29.3		1208	37.9
																			1728	22.1		1230	18
																			1014	24		1230	17.8
																			1864	21.7		1326	87.8
																			1632	32.6		1348	12.7
																			1833	26.2		1381	18
																			1174	26.6		1388	24
																			553	13.3		1403	17.9
																			405	12.3		1431	21
																			487	13.4		1460	19.5
																			1287	24.7		1461	16.6
																			925	35.4		1490	29.2
																			1741	33.4		1542	20.3
																			1053	27.1		1616	9.7
																			990	29.8		1805	14.8
																			554	13.1		1894	27.8
																			1466	32.4		1923	32.7
																			1195	29.9		2050	12.2
																			1053	33.9		2070	38.8
																			1473	34.6		2082	9.2
																			1117	22.4		2128	18.7
																			1891	28.2		2381	16.4
																			1907	25.9		2651	15.2
																			1009	36.3		2656	11.1
																			924	32.1		2692	10.6
																			1341	38.9		2693	10
																			1425	33.5		2756	10.7
																			958	31.4		2775	12.7
																			1234	29.2		3342	18
																			1838	27.1
																			1403	22.8
																			1394	22.3
																			988	31.2
																			1309	25.7
																			1254	24.8
																			395	9.1
																			1620	34.3
																			1107	32.2
																			1157	38.4
																			424	12.4
																			1011	28.6
																			1078	35
																			499	9.7
																			1286	26.4
																			1330	37.9
																			1053	32
																			910	46.3
																			1842	25
																			1041	25.4
																			424	7.9
																			1067	27.1
																			1651	22.6
																			1043	31.8
																			1241	24.3
																			1119	29.1
																			1128	25.3
																			939	35.9
																			983	35.3
																			970	31.5
																			1127	34.4
																			1434	22.7
																			1467	25.9
																			1199	23.5
																			1846	34.1
																			1173	26.2
																			1829	29.1
																			989	35.5
																			1087	48.2
																			1091	28
																			1349	29.3
																			1058	42.6
																			1104	25.2
																			965	30.9
																			937	31.3
																			492	9.9
																			352	5.7
																			354	8.8
																			362	6.1
																			376	7.8
																			384	6.1
																			397	6.1
																			403	5.7
																			409	7.3
																			409	5.7
																			413	6.3
																			440	6.5
																			446	6.1
																			449	5.8
																			469	6
																			480	6.4
																			548	8.9
																			558	9.3
																			570	10.1
																			593	8.7
																			595	7.2
																			599	8.4
																			605	9.5
																			616	12.8
																			621	8.1
																			634	9.9
																			646	8.8
																			896	41
																			896	13
																			896	13.2
																			903	40
																			909	12.1
																			932	37.1
																			937	51.7
																			940	49
																			946	39.4
																			946	20.9
																			946	21.6
																			952	32.8
																			955	35.8
																			959	34.1
																			965	38
																			965	30.6
																			967	21.9
																			970	38.6
																			972	44.8
																			974	33.3
																			974	46.7
																			976	23.3
																			978	45.2
																			979	27.4
																			992	26.1
																			996	38.8
																			996	32.6
																			1001	47.1
																			1003	27.7
																			1006	29.2
																			1007	31.3
																			1011	24.2
																			1011	24.8
																			1012	30.9
																			1013	28.2
																			1014	25.6
																			1015	25.4
																			1015	27.7
																			1018	29.1
																			1018	42.3
																			1018	29
																			1018	24.8
																			1019	30.9
																			1019	25.4
																			1021	23
																			1022	28.9
																			1023	29.4
																			1025	30.8
																			1026	17.1
																			1026	35.7
																			1026	25.3
																			1027	24.5
																			1027	38.8
																			1027	21
																			1028	31.8
																			1029	28.1
																			1031	24.7
																			1033	40.5
																			1033	24.6
																			1034	32.2
																			1034	18.9
																			1034	22.4
																			1035	24.9
																			1036	47.1
																			1037	30.3
																			1038	37.3
																			1040	23.8
																			1042	34.4
																			1042	42.2
																			1045	40.5
																			1045	23.9
																			1046	26.8
																			1047	41.1
																			1047	25.6
																			1048	43.3
																			1049	23
																			1049	21.9
																			1049	21.9
																			1050	24.8
																			1050	34.5
																			1051	24.1
																			1051	26.8
																			1052	17.1
																			1053	26.5
																			1054	20.4
																			1054	30.2
																			1055	24.7
																			1057	36.1
																			1057	25
																			1061	31.4
																			1062	37.4
																			1062	41.6
																			1065	33.6
																			1065	37.8
																			1066	24.9
																			1066	29.2
																			1071	38.1
																			1074	23.3
																			1075	31.2
																			1076	22.6
																			1076	22.1
																			1077	24.8
																			1077	16.6
																			1079	17.4
																			1079	30.9
																			1080	36.3
																			1080	47.8
																			1081	25.8
																			1082	19.8
																			1082	16.7
																			1082	36.1
																			1083	25.8
																			1083	23.2
																			1083	17.9
																			1084	41.6
																			1087	23.5
																			1089	21.5
																			1093	30.8
																			1094	33.5
																			1095	23.1
																			1096	33.6
																			1103	24.5
																			1104	34.5
																			1104	17.7
																			1105	35
																			1110	18.4
																			1116	43.7
																			1117	26.6
																			1117	37.6
																			1121	53.5
																			1121	29.2
																			1121	36
																			1121	19
																			1124	26.6
																			1126	27
																			1127	16.3
																			1131	21.7
																			1131	32.1
																			1133	32.9
																			1134	19.2
																			1135	32.2
																			1136	24
																			1136	32.2
																			1136	23
																			1136	19.1
																			1138	22.8
																			1138	25.4
																			1140	31.6
																			1141	31.1
																			1142	25.5
																			1143	28.7
																			1145	26.1
																			1147	30.6
																			1148	20.6
																			1149	23.7
																			1149	24.3
																			1149	16.4
																			1150	17.1
																			1150	22.8
																			1152	25.5
																			1152	28.7
																			1154	29.1
																			1157	18.2
																			1157	21.3
																			1159	24.4
																			1160	26.7
																			1160	49.9
																			1162	23.4
																			1163	22.7
																			1165	30.7
																			1166	24.9
																			1168	23.7
																			1172	21.2
																			1174	26.2
																			1174	19
																			1175	19.6
																			1175	20.4
																			1175	29.7
																			1177	30.9
																			1181	20.3
																			1182	29.5
																			1182	35.7
																			1183	46.1
																			1183	26.2
																			1183	22.8
																			1184	20.6
																			1186	23.7
																			1186	32.3
																			1186	23.9
																			1192	22.8
																			1195	14.7
																			1196	42.7
																			1196	28.6
																			1200	20.9
																			1201	25.4
																			1202	50.7
																			1202	38.2
																			1205	26
																			1206	19.4
																			1206	36.7
																			1209	21.3
																			1209	27.9
																			1215	20.7
																			1217	30.5
																			1217	27.9
																			1224	25.3
																			1224	32.5
																			1225	20
																			1225	20.7
																			1229	18.5
																			1241	33.9
																			1243	31.8
																			1246	36.9
																			1249	28.3
																			1259	20.7
																			1260	18.2
																			1260	22.9
																			1261	17.4
																			1261	19.4
																			1265	24.3
																			1274	20.1
																			1278	26.5
																			1313	29.8
																			1314	23.9
																			1317	31
																			1323	24.2
																			1323	23.3
																			1326	22.3
																			1333	27.7
																			1345	24.9
																			1345	19.4
																			1350	23.3
																			1354	20.7
																			1358	27.8
																			1384	27.7
																			1388	30.1
																			1392	20.3
																			1408	32.6
																			1422	22.1
																			1434	16.8
																			1434	16.5
																			1440	21.6
																			1444	43
																			1449	19.6
																			1450	23.6
																			1452	18.9
																			1454	21.9
																			1459	28.6
																			1460	20.4
																			1460	20.2
																			1461	25.5
																			1461	23.8
																			1464	22.6
																			1472	21.1
																			1499	19.3
																			1506	21.6
																			1555	25.9
																			1587	18.3
																			1599	28.7
																			1631	19.6
																			1636	22.1
																			1642	24.8
																			1646	25.1
																			1653	23.5
																			1655	17.5
																			2086	14.7
																			2122	20.6
																			2206	20.9
																			2231	21.5
																			2604	17.3
																			2651	13.5
																			2784	13.5
																			2890	13.8
																			359	6.2
																			384	7
																			399	6
																			399	6.8
																			409	8.5
																			410	5.6
																			411	5.8
																			413	6.1
																			418	5.2
																			436	5.9
																			438	5.8
																			453	8
																			455	5
																			456	7.4
																			461	7.4
																			465	6.9
																			556	7.7
																			564	7.5
																			802	15.9
																			911	37.4
																			921	27.2
																			930	25
																			943	29.5
																			950	24.6
																			964	18
																			968	27.6
																			968	32.5
																			974	37.8
																			974	31.1
																			980	23.6
																			983	46.9
																			986	19
																			988	47.4
																			989	44.9
																			990	18.4
																			994	25.9
																			998	28.2
																			1000	25.7
																			1001	34.2
																			1002	51.1
																			1004	31.4
																			1005	29.6
																			1006	40.3
																			1006	37
																			1006	28.1
																			1007	14.1
																			1012	24.3
																			1012	24.7
																			1013	21.3
																			1014	41.2
																			1015	61.4
																			1018	34.8
																			1018	27.3
																			1019	19.7
																			1019	31
																			1019	31
																			1021	32.4
																			1021	27.6
																			1021	39.5
																			1023	34.1
																			1024	60.3
																			1024	38.6
																			1025	46.6
																			1027	45.8
																			1027	30
																			1028	27.3
																			1028	32.5
																			1029	28.1
																			1029	19.2
																			1031	22.6
																			1032	24
																			1034	30.8
																			1036	29.7
																			1038	36.3
																			1041	41.9
																			1042	22
																			1043	28.2
																			1045	33
																			1046	27.6
																			1049	20.5
																			1050	27.8
																			1051	26.1
																			1052	25.6
																			1053	34.9
																			1053	44.5
																			1054	22.7
																			1058	39
																			1059	37.5
																			1060	28.9
																			1061	26
																			1062	28.6
																			1062	33.4
																			1063	40.1
																			1064	25.6
																			1065	29.6
																			1068	53.8
																			1069	35.6
																			1071	34.6
																			1074	23.4
																			1076	33.9
																			1083	34.6
																			1085	31.1
																			1086	26.2
																			1088	16.8
																			1089	22.7
																			1091	28.1
																			1091	20.6
																			1092	25.7
																			1092	16.8
																			1096	31.6
																			1097	19.7
																			1097	28.7
																			1098	23.9
																			1100	20.4
																			1101	55.9
																			1107	33.3
																			1107	26.6
																			1109	25.8
																			1113	39.7
																			1113	16.1
																			1113	35.2
																			1118	28.3
																			1120	26
																			1121	24.4
																			1125	17.6
																			1130	29.1
																			1130	30.8
																			1131	21.5
																			1131	24.2
																			1132	22.2
																			1141	21.3
																			1141	26.7
																			1141	16.6
																			1142	26.9
																			1145	18.1
																			1146	35.7
																			1147	31.4
																			1148	16.1
																			1150	24.8
																			1151	19.8
																			1152	33.8
																			1155	23.1
																			1161	23.5
																			1161	56.8
																			1161	34.6
																			1162	17.2
																			1163	20.6
																			1167	19.6
																			1173	21.1
																			1180	19.6
																			1184	28.4
																			1197	35.7
																			1203	24
																			1204	65
																			1207	54.8
																			1226	91.1
																			1233	16.9
																			1234	23
																			1241	46
																			1243	30.5
																			1253	18.2
																			1255	28.1
																			1259	40.6
																			1271	17.1
																			1275	42.9
																			1275	27.9
																			1276	17.7
																			1284	25
																			1285	18.4
																			1287	28.5
																			1297	27.6
																			1303	31.9
																			1309	38.4
																			1311	32.1
																			1329	28.3
																			1336	24.4
																			1341	34.8
																			1341	18
																			1346	40.4
																			1351	28.5
																			1359	46
																			1360	18
																			1361	26.1
																			1367	32
																			1367	27.8
																			1370	28.5
																			1376	18.9
																			1380	20.5
																			1381	18
																			1383	17.4
																			1389	25
																			1390	24.4
																			1391	19.9
																			1401	24.8
																			1402	26.7
																			1406	19.2
																			1419	25
																			1424	20.7
																			1446	19.1
																			1454	23
																			1455	17
																			1460	15.6
																			1462	19.8
																			1463	23.1
																			1471	25.4
																			1473	26.2
																			1477	18.5
																			1483	16.2
																			1497	17.1
																			1498	16.3
																			1501	21.1
																			1501	16.7
																			1502	20.9
																			1509	15.9
																			1510	18.9
																			1519	17.1
																			1546	18.3
																			1546	19.6
																			1566	14.8
																			1596	15.4
																			1610	21
																			1620	23
																			1620	22.5
																			1620	19.4
																			1622	32.1
																			1629	19.6
																			1634	24.1
																			1636	25.3
																			1637	24.3
																			1637	16.7
																			1638	13.7
																			1639	29.2
																			1642	25.7
																			1643	19.3
																			1644	20.3
																			1655	18.9
																			1658	15.8
																			1662	19.6
																			1676	31.3
																			1684	15.9
																			1684	20.3
																			1691	25.7
																			1693	19.8
																			1697	17.4
																			1704	17
																			1713	18.2
																			1720	13.2
																			1731	14.4
																			1736	18.5
																			1736	19.1
																			1738	20.2
																			1740	18.5
																			1741	18.1
																			1754	17.1
																			1760	15.2
																			1761	14.9
																			1766	16.9
																			1766	17.7
																			1776	24.1
																			1789	18.9
																			1795	18.4
																			1799	16.3
																			1807	16
																			1817	14
																			1827	18.2
																			1841	19.1
																			1843	11.7
																			1848	15.1
																			1851	16.4
																			1905	14.8
																			1911	19.1
																			1911	16.9
																			2370	18.5
																			2487	14.7
																			2587	19.2
																			2696	14.2
																			2696	19.9
																			2699	19.7
																			2713	14.3
																			2722	19.9
																			2730	17.4
																			2740	20.3
																			2795	12
																			2850	20.4
																			3168	14.3
																			369	6.5
																			370	5.1
																			373	5
																			373	7
																			378	5.3
																			380	7.9
																			385	6
																			390	8.3
																			404	5.2
																			406	6.8
																			409	7.3
																			410	6.2
																			411	7.5
																			414	7.6
																			417	8.6
																			417	6.7
																			418	7.3
																			420	4.6
																			421	5.9
																			422	6.7
																			427	6.8
																			428	10
																			432	7.3
																			433	5.9
																			436	7.3
																			437	4.9
																			439	8.2
																			440	6.4
																			444	5.7
																			444	5.5
																			447	7.9
																			448	7.3
																			455	6.2
																			457	7.2
																			459	9
																			460	7.8
																			461	8.6
																			471	4.7
																			532	6.6
																			546	7.5
																			559	10.8
																			575	7
																			580	8.2
																			605	8.7
																			605	10.9
																			612	6.3
																			615	9.4
																			618	10.9
																			632	12.9
																			635	11.6
																			893	33.2
																			913	38.9
																			923	28.6
																			926	20.1
																			939	28.1
																			947	44.7
																			950	35
																			959	38.8
																			959	24.4
																			964	70.8
																			964	31
																			966	37.8
																			967	26.8
																			972	22.8
																			973	40
																			975	25
																			976	50.8
																			986	24.5
																			987	26
																			987	42.5
																			988	32.2
																			991	28.1
																			992	56.2
																			995	30
																			996	31.9
																			997	47.6
																			999	25.3
																			999	46.3
																			1002	23.7
																			1002	18.2
																			1003	30.7
																			1004	25.8
																			1006	21.9
																			1009	28.5
																			1009	27.1
																			1012	24.2
																			1013	27.4
																			1013	33.6
																			1014	26.3
																			1014	33.9
																			1015	27.8
																			1016	20
																			1018	30.2
																			1019	47.4
																			1021	26.4
																			1023	33.6
																			1023	38.9
																			1023	31.5
																			1025	26.5
																			1025	37.3
																			1025	41.9
																			1028	34.6
																			1029	61.6
																			1030	26.1
																			1030	38.2
																			1031	38.5
																			1034	39.6
																			1035	26.9
																			1038	27.2
																			1038	35.7
																			1039	26.1
																			1040	19.1
																			1040	32.4
																			1041	24.7
																			1042	33
																			1043	36.9
																			1044	53.8
																			1045	21.4
																			1046	18.5
																			1048	25.8
																			1049	35.6
																			1050	20.4
																			1050	33.6
																			1050	37.4
																			1050	23.9
																			1053	53.6
																			1054	26.5
																			1054	33.8
																			1060	40.7
																			1066	29.9
																			1068	25.7
																			1070	26.4
																			1071	23.9
																			1071	29.5
																			1074	21.4
																			1077	52.6
																			1078	29.8
																			1079	24.9
																			1080	27.4
																			1081	25.1
																			1083	24.1
																			1088	19.8
																			1088	22.8
																			1090	31.2
																			1092	28.3
																			1094	18.9
																			1095	22.8
																			1099	36.1
																			1100	42.5
																			1100	20.3
																			1101	26.4
																			1102	34.1
																			1102	32
																			1102	29.8
																			1104	30.8
																			1105	26.9
																			1105	23.9
																			1107	28.2
																			1107	15.9
																			1109	26
																			1113	34.9
																			1113	49.6
																			1115	27.1
																			1117	32.8
																			1117	46.5
																			1119	30.3
																			1119	20.3
																			1120	45.3
																			1121	29.4
																			1121	42.9
																			1122	33.7
																			1126	27.5
																			1127	38.8
																			1129	22.9
																			1132	39.4
																			1133	22
																			1134	36.1
																			1139	24.2
																			1141	17.9
																			1141	30
																			1143	27.4
																			1144	31.3
																			1146	34.9
																			1150	29.6
																			1150	32
																			1154	37.3
																			1155	22.6
																			1155	32.2
																			1156	28
																			1158	24
																			1160	31.7
																			1164	21.7
																			1164	27.5
																			1166	28.2
																			1167	37.9
																			1169	35.2
																			1171	16.7
																			1172	26.7
																			1174	30.8
																			1181	29.9
																			1185	26.4
																			1187	22.4
																			1198	24.9
																			1198	29.7
																			1206	28.1
																			1211	24.9
																			1214	34.1
																			1227	32.5
																			1238	19.4
																			1240	21.3
																			1240	53.4
																			1249	27
																			1254	13.7
																			1263	25.7
																			1263	24.5
																			1274	23.2
																			1287	17.6
																			1294	22.8
																			1294	31.2
																			1296	21.5
																			1301	27.4
																			1309	32
																			1316	29.8
																			1330	24.7
																			1335	20.7
																			1336	30.9
																			1340	26.9
																			1341	18.7
																			1341	49.3
																			1341	19.9
																			1345	37.8
																			1348	28
																			1353	37.8
																			1361	22.2
																			1375	24.8
																			1382	36.5
																			1398	34.2
																			1400	30.8
																			1403	17.8
																			1407	37.5
																			1436	23.8
																			1436	25.6
																			1438	17.1
																			1447	29.8
																			1449	24.5
																			1453	22.6
																			1454	23.8
																			1456	25.3
																			1458	22.8
																			1461	24.4
																			1470	21
																			1486	24.2
																			1488	21.4
																			1491	21.1
																			1493	30.6
																			1535	20.7
																			1561	38.8
																			1624	16.7
																			1647	20.5
																			1661	21.1
																			1671	20.7
																			1698	20.8
																			1714	31
																			1834	18
																			1846	24
																			1857	21.5
																			1858	25.9
																			1876	20.7
																			1881	19.1
																			2060	15.3
																			2088	16.3
																			2111	17.7
																			2270	16.8
																			2617	15.7
																			2651	18.2
																			2707	15.5
																			2718	18.3
																			2736	20.2
																			2791	14.3
																			306	6.9
																			307	4.4
																			319	5.2
																			320	4.3
																			321	5.1
																			332	4.8
																			332	4.1
																			336	5.2
																			342	6.9
																			355	5.6
																			356	4.9
																			357	6.6
																			363	6.1
																			363	7.5
																			363	4.5
																			365	5.4
																			369	4
																			373	5
																			375	6
																			375	5.4
																			376	6.5
																			386	5.3
																			388	6.2
																			389	5.7
																			391	4.9
																			404	4.4
																			404	5
																			405	4.6
																			405	5.3
																			406	4.7
																			407	4.6
																			408	5.7
																			408	5.4
																			410	6.6
																			410	5.7
																			411	5.5
																			412	5.7
																			412	4.7
																			413	5.8
																			413	6.7
																			413	6.2
																			414	5
																			415	6.6
																			416	3.8
																			416	5.7
																			417	5.6
																			420	5.3
																			423	6.5
																			423	5.8
																			424	6.1
																			426	4.8
																			427	8.7
																			428	5.2
																			429	5.8
																			429	5.6
																			431	7.2
																			431	6.3
																			432	6.8
																			448	5.6
																			454	6.3
																			456	6.3
																			460	5.3
																			492	6.7
																			496	6.6
																			525	9.7
																			526	6.4
																			530	7.3
																			531	9
																			532	5.9
																			534	6.4
																			534	7.3
																			536	8.3
																			536	8.3
																			537	8
																			540	7.1
																			540	6
																			543	8.2
																			544	6.1
																			549	7.9
																			550	8.7
																			558	8.4
																			563	9.1
																			564	7.7
																			567	7.4
																			576	8.6
																			577	7.3
																			577	7.6
																			582	8.2
																			582	9.5
																			584	7.1
																			584	6.9
																			588	6.7
																			589	8.2
																			589	5.2
																			589	7.3
																			591	7.7
																			595	8.5
																			595	9.4
																			596	9.4
																			597	7.8
																			600	7.9
																			600	10.3
																			602	7.2
																			603	7.2
																			604	7.5
																			604	9.4
																			604	7.7
																			605	9.2
																			606	6.3
																			608	8.7
																			608	8.3
																			609	7.3
																			609	9.4
																			609	8.8
																			610	8.1
																			610	8.6
																			611	11
																			613	8.2
																			614	8.8
																			614	7.2
																			614	9.6
																			615	6.1
																			615	8.7
																			615	7.8
																			616	8.2
																			616	10.2
																			618	8.3
																			618	8.2
																			619	7.3
																			619	7.4
																			623	7.9
																			624	7.8
																			624	8.5
																			627	6.5
																			628	8
																			628	8.8
																			628	6.9
																			629	9.6
																			629	9.9
																			638	7.6
																			639	9.2
																			640	6.5
																			641	8.8
																			642	7.4
																			647	11.3
																			649	9.2
																			650	8.6
																			650	8.6
																			654	9.1
																			654	10.4
																			706	8.4
																			709	8.3
																			729	7.3
																			763	10.8
																			765	13
																			833	11.4
																			876	10.8
																			920	33.1
																			925	37.4
																			942	55.6
																			958	21.6
																			959	34.1
																			963	28.5
																			975	25.2
																			979	38.2
																			981	21.9
																			994	29.1
																			995	38.4
																			995	25.8
																			1005	33.3
																			1005	41.8
																			1010	27
																			1014	19.5
																			1018	39.7
																			1022	32.6
																			1028	29.3
																			1032	52.3
																			1037	20.5
																			1038	27.1
																			1039	39
																			1040	22.4
																			1049	20.2
																			1050	19.5
																			1052	28.9
																			1056	21.9
																			1063	46.8
																			1066	21.2
																			1067	33.7
																			1076	21
																			1077	22.2
																			1080	22.4
																			1086	16.2
																			1090	22.6
																			1090	63.5
																			1091	38.9
																			1093	24
																			1094	27.3
																			1098	24.5
																			1099	48.3
																			1103	43.8
																			1112	29.6
																			1113	25.7
																			1121	22.8
																			1122	30.7
																			1125	21.1
																			1134	27
																			1135	31.8
																			1141	39.5
																			1151	27.7
																			1182	19.4
																			1193	20.9
																			1202	56.1
																			1212	19.1
																			1213	17.6
																			1231	17.4
																			1234	14.7
																			1240	35.4
																			1242	15.5
																			1258	32.6
																			1274	20.6
																			1286	49.8
																			1301	37.3
																			1324	17.9
																			1347	16.4
																			1386	26.2
																			1392	24.7
																			1398	24
																			1398	22.6
																			1406	18.1
																			1416	22.2
																			1460	17.8
																			1480	24.3
																			1487	16.4
																			1493	24.2
																			1494	21
																			1504	20
																			1527	16.7
																			1569	22.9
																			1595	17.2
																			1627	26.2
																			1658	24.7
																			1678	28.8
																			1687	19.8
																			1767	18.8
																			1770	22.7
																			1795	21.4
																			1880	15.7
																			1899	17.2
																			1930	21.6
																			1977	15.7
																			2009	17
[truncated: 16 more rows]
[truncated: 63 more columns]

## Sheet: References
Reference
Alsalem, O.B., Fan, M., Zamora, J., Xie, X., and Griffin, W.R., 2018, Paleozoic sediment dispersal before and during the collision between Laurentia and Gondwana in the Fort Worth Basin, USA: Geosphere, v. 14, no. 1, p. 325–342, doi: 10 .1130/GES01480.1.
Alsleben, H., Wetmore, P.H., Gehrels, G.E., and Paterson, S.R., 2012, Detrital zircon ages in Palaeozoic and Mesozoic basement assemblages of the Peninsular Ranges batholith, Baja California, Mexico: constraints for depositional ages and provenance. International Geology Review, v. 54, p. 93-110.
Amato, J.M., and Mack, G.H., 2012, Detrital zircon geochronology from the Cambrian-Ordovician Bliss Sandstone, New Mexico: Evidence for contrasting Grenville-age and Cambrian sources on opposite sides of the Transcontinental Arch. GSA Bulletin
Attia, S. Paterson, S.R., Wenrong, C., Chapman, A.D., Saleeby, J., Dunne, G., Stevens, C., Memeti, V., in press, Paleogeographic affinity and tectonic assembly of pre-Mesozoic Sierra Nevada framework terranes, submitted to GSA Special Papers.
Becker, T.P., Thomas, W.A., Samson, S.D. and Gehrels, G.E., 2005, Detrital zircon evidence of Laurentian crustal dominance in the lower Pennsylvanian deposits of the Alleghenian clastic wedge in eastern North America. Sedimentary Geology, 182, 59–86.
Beranek, L.P., Link, P.K., and Fanning, C.M., 2016, Detrital zircon record of mid-Paleozoic convergent margin activity in the northern U.S. Rocky Mountains: Implications for the Antler orogeny and early evolution of the North American Cordillera. Lithosphere, v.8, p 533-550.
Boothroyd, J., 2012, Carboniferous provenance trends from clastic strata of the Michigan Basin, M.S. Thesis, Michigan State University, East Lansing, MI, USA, 189 pp.
Bradley, D.C. & O’Sullivan, P. 2016. Detrital zircon geochronology of pre-and syn-collisional strata, Acadian orogen, Maine Appalachians. Basin Research, https://doi.org/10.1111/bre.12188.
Bream, B.R., Hatcher, R.D., Jr., Miller, C.F., and Fullagar, P.D., 2004, Detrital zircon ages and Nd isotopic data from the southern Appalachian crystalline core, Georgia, South Carolina, North Carolina, and Tennessee: New provenance constraints for part of the Laurentian margin, in Tollo, R.P., Corriveau, L., McLelland, J., and Bartholomew, M.J., eds., Proterozoic tectonic evolution of the Grenv…
Cawood, P.A., and Nemchin, A.A. 2000, Provenance record of a rift basin: U/Pb ages of detrital zircons from the Perth Basin, Western Australia. Sediment. Geol. 134:209-234.
Charnock, R.D., 2015. Origin and evolution of the southeastern Merrimack Belt, Massachusetts. M.S. Thesis, Colorado School of Mines, Golden, CO, USA, 107 pp. (advisor)
Cole, D., Myrow, P., Fike, D.A., Hakim, A., and Gehrels, 2015, Uppermost Devonian (Famennian) to Lower Mississippian events of the western U.S.: Stratigraphy, sedimentology, chemostratigraphy, and detrital zircon geochronology. Palaeogeography, Palaeoclimatology, Palaeoecology. v. 427, p. 1-19.
Darby, B.J., Wyld, S.J., and Gehrels, G.E., 2000, Provenance and paleogeography of the Black Rock terrane, northwestern Nevada: Implications of U-Pb detrital zircon geochronology. In Soreghan., M.J. and Gehrels, G.E., eds. Paleozoic and Triassic paleogeography and tectonics of western Nevada and northern California. Boulder, Colorado. Geological Society of America Special Paper 347:77-87.
De Souza, S., Tremblay, A. & Ruffet, G. 2014. Taconian orogenesis, sedimentation and magmatism in the southern Quebec–northern Vermont Appalachians: Stratigraphic and detrital mineral record of Iapetan suturing. American journal of science, 314, 1065–1103.
Dodson, S. 2008. Petrographic and geochronologic provenance analysis of Upper Pennsylvanian fluvial sandstones of the Conemaugh and Monongahela Groups, Athens County, Ohio. Unpublished MS thesis. Ohio University. 86 pp.
Dokken, R. 2017. Detrital Zircon Studies in Silurian Basins of Southern New Brunswick. M.Sc. Thesis, University of Alberta
Dorais, M.J.; Wintsch, R.P.; Nelson, W.R.; and Tubrett, M. 2009. Insights into the Acadian orogeny, New England Appalachians: a provenance study of the Carrabassett and Kittery formations, Maine. Atlantic Geol. 45:50-71.
Eriksson, K.A., Campbell, I.H., Palin, J.M., Allen, C.M. and Bock, B., 2004, Evidence for multiple recycling in Neoproterozoic through Pennsylvanian sedimentary rocks of the central Appalachian basin. Journal of Geology, 112, 261–276.
Evans, J.E., and Soreghan, M., 2015, Long-distance sediment transport and episodic resedimentation of Pennsylvanian dust (eolian silt) in cave passages of the Mississippian Leadville Limestone, southwestern Colorado, USA. GSA Special Paper 516
Fyffe, L.R., Barr, S.M., et al. 2009. Detrital zircon ages from Neoproterozoic and Early Paleozoic conglomerate and sandstone units of New Brunswick and coastal Maine: Implications for the tectonic evolution of Ganderia. Atlantic Geology, 45, 110–144.
Gehrels, G.E., and Dickinson, W.R., 2000, Detrital zircon geochronology of the Antler overlap and foreland basin assemblages, Nevada, in Gehrels, G.E., and Soreghan, M.J., eds., Paleozoic and Triassic Paleogeography and Tectonics of Western Nevada and Northern California: Boulder, Colorado, Geological Society of America, Spe- cial Paper 347, p. 57–63, doi:10.1130/0-8137-2347-7.57.
Gehrels, G.E., and Miller, M.M., 2000, Detrital zircon geochronologic study of upper Paleozoic strata in the eastern Klamath terrane, northern California, in Soreghan, M.J., and Gehrels, G.E., eds., Paleozoic and Triassic paleogeography and tectonics of western Nevada and northern California: Boulder, Colorado, Geological Society of America Special Paper 347, p. 99–107.
Gehrels, G.E., and Pecha, M., 2014, Detrital zircon U-Pb geochronology and Hf isotope geochemistry of Paleozoic and Triassic passive margin strata of western North America: Geosphere, v. 10, p. 49–65, doi:10.1130/GES00889.1.
Gehrels, G.E., Blakey, R., Karlstrom, K.E.,Timmons, J.M., Dickinson,W.R., and Pecha, M., 2011, Detrital zircon U-Pb geochronology of Paleozoic strata in the Grand Canyon: Lithosphere, v. 3, p. 183–200, doi:10.1130 /L121.1.
Gehrels, G.E., Stewart, J.H., and Ketner, K.B., 2002, Cordilleran margin quartzites in Baja California - implications for tectonic transport, Earth and Planetary Science Letters v. 199 p.201-210
Gillis, R.J., Gehrels, G.E., Ruiz, J., Flores de Dios González, L.A., 2005. Detrital zircon provenance of Cambrian–Ordovician and Carboniferous strata of the Oaxaca terrane, southern Mexico. Sedimentary Geology, v. 182, p. 87-100.
Gleason, J.D., Finney, S.C., and Gehrels, G.E. 2002, Paleotectonic implications of a Mid- to Late-Ordovician provenance shift, as recorded in sedimentary strata of the Ouachita and Southern Appalachian Mountains. J. Geol. 110:291-304.
Gleason, J.G., Gehrels, G.E., Dickinson, W.R., Patchett, P.J., and Kring, D.A., 2007, Laurentian sources for detrital zircon grains in turbidite and deltaic sandstones of the Pennsylvanian Haymond Formation, Marathon Assemblage, West Texas, U.S.A.: Journal of Sedimentary Research, v. 77, no. 11, p. 888–900, doi:10.2110/ jsr.2007.084.
Gray, M.B., and Zeitler, P.K. 1997, Comparison of clastic wedge provenance in the Appalachian foreland using U/Pb ages of detrital zircons. Tectonics. 16:151-160.
Harding, J.P., Gehrels, G.E., Harwood, D.S., and Girty, G.H. 2000, Detrital zircon geochronology of the Shoo Fly Complex, northern Sierra terrane, northeastern California. In Soreghan., M.J. and Gehrels, G.E., eds. Paleozoic and Triassic paleogeography and tectonics of western Nevada and northern California. Boulder, Colorado. Geological Society of America Special Paper 347:43-55.
He, T.X., 2017. Origin and evolution of the Rocky Pond Slice, an enigmatic tectonic block in eastern Massachusetts. M.S. Thesis, Colorado School of Mines, Golden, CO, USA, 138 pp.
Henderson, B.J., Collins, W.J., Murphy, J.B., Gutierrez-Alonso, G. & Hand, M. 2016. Gondwanan basement terranes of the Variscan–Appalachian orogen: Baltican, Saharan and West African hafnium isotopic fingerprints in Avalonia, Iberia and the Armorican Terranes. Tectonophysics, 681, 278–304, https://doi.org/10.1016/j.tecto.2015.11.020.
Ibrahim, D.M., 2016, High-resolution sequence stratigraphy and detrital zircon provenance of the Ordovician Ancell Group in the Iowa and Ilinois Basins: insight into the evolution of midcontinental intracratonic basins of North America. Unpublished Ph.D dissertation. University of Iowa 179 pp.
Kissock, J.K., 2016, Detrital zircon evidence for the unroofing of the northern Appalachians in Early-Middle Pennsylvanian sandstones of North America. Unpublished MS thesis.University of Iowa. 207 pp.
Kissock, J.K., Finzel, E.S., Malone, D.H., and Craddock, J.P., 2018, Lower–Middle Pennsylvanian strata in the North American midcontinent record the interplay between erosional unroofing of the Appalachians and eustatic sea-level rise: Geosphere, v. 14, no. 1, https://doi.org/10.1130/GES01512 .1.
Konstantinou, A., Wirth, K.R., Vervoort, J.D., Malone, D.H., Davidson, C., and Craddock, J.P., 2014, Provenance of quartz arenites of the Early Paleozoic midcontinent region, USA: The Journal of Geology, v. 122, p. 201-216.
Kraft, J.L., 2013, Stratigraphy, paleogeography and tectonic evolution of early Paleozoic to Triassic pericratonic strata in the northern Kootenay Arc, southeastern Canadian Cordillera, British Columbia, Unpublished PhD dissertation. University of Alberta, 361 pp.
Kuiper, Y.D., Shields, C.D., Tubrett, M.N., Bennett, V., and Buchwaldt, R., 2014, Age and provenance of a Paleoproterozoic to Devonian Canadian Cordilleran sequence of metasedimentary rocks, Thor–Odin dome, southeastern British Columbia. GSA Bulletin. v. 126; no. 9/10; p. 1259–1274; doi: 10.1130/B31031.1
Lemieux, Y., Thompson, R.I., Erdmer, P., Simonetti, A., and Creaser, R.A. 2007, Detrital zircon geochronology and provenance of Late Proterozoic and mid- Paleozoic successions outboard of the miogeocline, southeastern Canadian Cordillera. Can. J. Earth Sci. 44:1675-1693.
Linde, G.M., Trexler, J.H., Jr., Cashman, P.H., Gehrels, G.E., and Dickinson, W.R., 2016, Detrital zircon U-Pb geochronology and Hf isotope geochemistry of the Roberts Mountain allochthon: New insights into the early Paleozoic tectonics of western North America: Geosphere, doi:10.1130/GES01252.1.
Link, P.K., Mahon, R.C., Beranek, L.P., Campbell-Stone, E.A., and Lynds, R., 2014, Detrital zircon provenance of Pennsylvanian to Permian sandstones from the Wyoming craton and Wood River basin, Idaho, U.S.A.: Rocky Mountain Geology, v. 49, p. 115–136, doi: 10.2113/gsrocky.49.2.115.
Loan, M.L., 2011. New Constraints on the Age and Deposition of the Metasedimentary Rocks in the Nashoba terrane, SE New England. M.S. Thesis, Boston College, Chestnut Hill, MA, USA, 125 pp.
Malone, D.H., Craddock, J.P, Konstantinou, A., McLaughlin, P.I., and McGillivray, K.M., 2017, Detrital Zircon Geochronology of the Bighorn Dolomite, Wyoming, USA: Evidence for Trans-Hudson Dust Deposition on the Western Laurentian Carbonate Platform. Journal of Geology, v. 125, p. 261-269.
Martens, U., Weber, B., and Valencia, V., 2010, U/Pb geochronology of Devonian and older Paleozoic beds in the southeastern Maya block, Central America: Its affinity with peri-Gondwanan terranes, GSA Bulletin, v. 122. p. 815-829.
May, S.R., Gray, G.G., Summa, L.L., Stewart, N.R., Gehrels, G.E., and Pecha, M.E., 2013, Detrital zircon geochronology from the Bighorn Basin, Wyoming, USA: Implications for tectonostratigraphic evolution and paleogeography: Geological Society of America Bulletin, v. 125(9-10), p. 1403-1422.
McFadden, S., S.H. Emerman, J.P. Dawson, K.A. Rey, and T.K. Anderson, 2012. Evidence from detrital zircon ages for Middle Pennsylvanian uplift and drainage in the source area of the Chariton Conglomerate and Marmaton Group sandstones, southern Iowa and northern Missouri: Journal of the Iowa Academy of Science, v. 119, pp. 8-15.
McGuire, P.R., 2017, U-Pb detrital zircon signature of the Ouachita orogenic belt. Unpublished MS thesis. Texas Christian University. 78 pp.
McLennan, S.M., Bock, B., Compston, W., Hemming, S.R., and McDaniel, D.K. 2001, Detrital zircon geochronology of Taconian and Acadian foreland sedimentary rocks in New England. J. Sediment. Res. 71:305-317.
McWilliams, C.K., Walsh, G.J. & Wintsch, R.P. 2010. Silurian-Devonian age and tectonic setting of the Connecticut Valley-Gaspe trough in Vermont based on U-Pb SHRIMP analyses of detrital zircons. American Journal of Science, 310, 325–363.
Memeti, V., Gehrels, G.E., Paterson, S.R., Thompson, J.M., Mueller, R.M., and Pignotta, G.S., 2010, Evaluating the Mojave-Snow Lake fault hypothesis and origins of central Sierran metasedimentary pendant strata using detrital zircon provenance analyses: Lithosphere, v. 2, p. 341–360, doi: 10.1130/L58.1.
Mohamed, T.I., 2015, Sequence Stratigraphy and Provenance of the Bakken Formation in Southeast Alberta and Southwest Saskatchewan, Unpublished MS thesis. University of Calgary, 106 pp.
Murphy, J.B., and Hamilton, M.A., 2000. U-Pb detrital zircon age constraints on evolution of the Late Paleozoic St. Marys Basin, central mainland Nova Scotia. Journal of Geology, v. 108, p. 53-72.
Murphy, J.B., and Hamilton, M.A., 2000. U-Pb detrital zircon age constraints on evolution of the Late Paleozoic St. Marys Basin, central mainland Nova Scotia. Journal of Geology, v. 108, p. 53-72.
Murphy, J.B., Fernandez-Suarez, J. & Jeffries, T.E. 2004a. Lithogeochemical and Sm-Nd and U-Pb isotope data from the Silurian-Lower Devonian Arisaig Group clastic rocks, Avalon terrane, Nova Scotia: A record of terrane accretion in the Appalachian-Caledonide orogen. Geological Society of America Bulletin, 116, 1183–1201.
Murphy, J.B., Fernandez-Suarez, J., Keppie, J.D. & Jeffries, T.E. 2004b. Contiguous rather than discrete Paleozoic histories for the Avalon and Meguma Terranes based on detrital zircon data. Geology, 32, 585–588.
Park, H., Barbeau, D.L., Rickenbaker, A., Bachman-Krug, D., Gehrels, G., 2009, Application of Foreland Basin Detrital-Zircon Geochronology to the Reconstruction of the Southern and Central Appalachian Orogen, Journal of Geology, v. 118, p. 23-44.
Pickell, M. J., 2012, Detrital Zircon Geochronology of Middle Ordovician Silicilastic Sediment on the Southern Laurentian Shelf. Unpublished MS thesis. Texas A&M, 120 pp.
Pothier, H.D., Waldron, J.W.F., DuFrane, S.A., White, C.E. & Jamieson, R.A. 2015b. Stratigraphy, Provenance and Tectonic Setting of the Lumsden Dam and Bluestone Quarry Formations (Lower Ordovician), Halifax Group, Nova Scotia. Atlantic Geology, 51, 51–83.
Riley, B.C.D., Snyder, W.S., and Gehrels, G.E., 2000, Detrital zircon geochronology of the Golconda allochton, Nevada. In Soreghan., M.J. and Gehrels, G.E., eds. Paleozoic and Triassic paleogeography and tectonics of western Nevada and northern California. Boulder, Colorado. Geological Society of America Special Paper 347:65-75.
Ross, G.M., McNicoll, V.J., Geldsetzer, H.H.J., Parrish, R.R., Carr, S.D., and Kinsman, A., 1993, Detrital zircon geochronology of Siluro-Devonian sandstones, Rocky Mountains, northeastern British Columbia. B. Can. Petrol. Geol. 41:349-357.
Sarrah, K.L., 2006, Comparative study of the sedimentology and provenance of the Atoka formation in the frontal Ouachita thrust belt, Oklahoma. Ph.D. Dissertation, University of Tulsa, Tulsa, OK, USA, 252 pp.
Siddoway, C.S. and Gehrels, G.E., 2014, Basement-hosted sandstone injectites of Colorado: A vestige of the Neoproterozoic revealed through detrital zircon provenance analysis. Lithosphere, v.6, p. 403-408.
Soreghan, G.S., Moses, A.M., Soreghan, M.J., Hamilton, A., Fanning, C.M., and Link, P.K. 2007. Palaeoclimatic inferences from upper Palaeozoic siltstone of the Earp Formation and equivalents, Arizona-New Mexico (USA). Sedimentology. 54:701- 719.
Soreghan, M.J., Soreghan, G.S., and Hamilton, M.A., 2002, Paleowinds inferred from detrital-zircon geochronology of upper Paleozoic loessite, western equatorial Pangea. Geology. 30:695-698.
Sorota, K.J., 2013. Age and origin of the Merrimack terrane, southeastern New England: a detrital zircon U-Pb geochronology study. M.S. Thesis, Boston College, Chestnut Hill, MA, USA, 217 pp.
Spurlin, M.S., Gehrels, G.E., and Harwood, D.S., 2000, Detrital zircon geochronology of upper Paleozoic and lower Mesozoic strata of the northern Sierra terrane, northeastern California. In Soreghan., M.J. and Gehrels, G.E., eds. Paleozoic and Triassic paleogeography and tectonics of western Nevada and northern California. Boulder, Colorado. Geological Society of America Special Paper 347:89-98.
Thomas, W.A., Becker, T.P., Samson, S.D., and Hamilton, M.A., 2004, Detrital zircon evidence of a recycled orogenic foreland provienance for Alleghanian clastic- wedge sandstones. J.Geol. 112:23-37.
Thomas, W.A., Gehrels, G.E., and Romero, M.C., 2016, Detrital zircons from crystalline rocks along the Southern Oklahoma fault system, Wichita and Arbuckle Mountains, USA: Geo- sphere, v. 12, p. 1224–1234, doi:10.1130/GES01316.1.
Thomas, W.A., Gehrels, G.E., Greb, S.F., Nadon, G.C., Satkoski, A.M., and Romero, M.C., 2017, Detrital zircons and sediment dispersal in the Appalachian foreland. Geosphere, v. 13, p. 2206-2230.
Wallin, E.T., Noto, R.C., and Gehrels, G.E., 2000, Provenance of the Antelope Mountain Quartzite, Yreka terrane, California: Evidence for large-scale late Paleozoic sinistral displacement along the North American Cordilleran margin and implications for the mid-Paleozoic fringing-arc model, in Soreghan, M.J., and Gehrels, G. E., eds., Paleozoic and Triassic paleogeography and tectonics of western …
Weber, B., Schaaf, P., Valencia, V., Iriondo, A., Ortega-Gutiérrez, F., 2006, Provenance ages of Late Paleozoic sandstones (Santa Rosa Formation) from the Maya block, SE Mexico – implications on the tectonic evolution of western Pangea: Revista Mexicana de Ciencias Geológicas, 23, 262-276.
West, D.P. Jr., Yates, M.G.,; Gerbi, C., and Barnard, N.Q. 2008, Metamorphosed Ordovician Fe- and Mn-rich rocks in south-central Maine: From peri-Gondwanan deposition through Acadian metamorphism. Am. Min. 93:270-282.
Wilson, R.A., Van Staal, C.R. & McClelland, W.C. 2015. Synaccretionary sedimentary and volcanic rocks in the Ordovician Tetagouche backarc basin, New Brunswick, Canada: Evidence for a transition from foredeep to forearc basin sedimentation. American Journal of Science, 315, 958–1001.
Wintsch, R.P., Aleinikoff, J.N., Walsh, G.J., Bothner, W.A., Hussey, A.M. & Fanning, C.M. 2007. Shrimp U-Pb evidence for a Late Silurian age of metasedimentary rocks in the Merrimack and Putnam-Nashoba terranes, eastern New England. American Journal of Science, 307, 119–167.
Xie, X., Cains, W., Manger, W.L., 2016a, U–Pb detrital zircon evidence of transcontinental sediment dispersal: provenance of Late Mississippian Wedington Sandstone member, NW Arkansas, International Geology Review, v. 58, p. 1951-1966.
Xie, X., O'Connor, P.M., Alsleben, H., 2016b, Carboniferous sediment dispersal in the Appalachian–Ouachita juncture: Provenance of selected late Mississippian sandstones in the Black Warrior Basin, Mississippi, United States, Sedimentary Geology, v. 342, p. 191-201.

## Sheet: Info
Total number of analyses			Average proportion of grains not captured by pie slices
Ordovician	11146		10.8545
Silurian-Devonian	10055		10.943
Mississippian	4199		9.12298
Pennsylvanian	12024		9.2851
TOTAL	37424
